# Supplementary material for: Analysis of variation in charges and prices paid for vaginal and caesarean section births: a cross-sectional study
Source: PubMed Central journal article supplement — BMJ Open. 2014 Jan 15;4(1):e004017. doi: 10.1136/bmjopen-2013-004017 (PMC3902513; doi:10.1136/bmjopen-2013-004017), 2014-01-15
Supplement: bmjopen-2013-004017.draft_revisions.pdf [file bmjopen-2013-004017.draft_revisions.pdf]

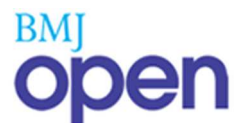

**Analysis of Variation in Charges and Prices Paid for Vaginal and Cesarean Section Births: A Cross-Sectional Study**

|                                 |                                                                                                                                                                                                                                                                                                   |
|---------------------------------|---------------------------------------------------------------------------------------------------------------------------------------------------------------------------------------------------------------------------------------------------------------------------------------------------|
| Journal:                        | <i>BMJ Open</i>                                                                                                                                                                                                                                                                                   |
| Manuscript ID:                  | bmjopen-2013-004017                                                                                                                                                                                                                                                                               |
| Article Type:                   | Research                                                                                                                                                                                                                                                                                          |
| Date Submitted by the Author:   | 12-Sep-2013                                                                                                                                                                                                                                                                                       |
| Complete List of Authors:       | Hsia, Renee; UCSF, Emergency Medicine<br>Akosa Antwi, Yaa; Indiana University Purdue University – Indianapolis, Department of Economics<br>Weber, Ellerie; RAND-University of Pittsburgh Health Institute-Carnegie Mellon University,<br>Galan, Emilio; UC Berkeley – UCSF Joint Medical Program, |
| <b>Primary Subject Heading</b>: | Health services research                                                                                                                                                                                                                                                                          |
| Secondary Subject Heading:      | Obstetrics and gynaecology                                                                                                                                                                                                                                                                        |
| Keywords:                       | HEALTH SERVICES ADMINISTRATION & MANAGEMENT, OBSTETRICS, Health economics < HEALTH SERVICES ADMINISTRATION & MANAGEMENT                                                                                                                                                                           |
|                                 |                                                                                                                                                                                                                                                                                                   |

SCHOLARONE™  
Manuscripts

1  
2  
3 **Analysis of Variation in Charges and Prices Paid for Vaginal and Cesarean Section Births:**  
4  
5  
6 **A Cross-Sectional Study**  
7

8 Renee Y. Hsia, Yaa Akosa Antwi, Ellerie Weber, Emilio Galan  
9

10  
11  
12  
13 Word Count: 3567  
14

15  
16  
17 Author affiliations:

18 Renee Y. Hsia, MD, MSc (corresponding author)  
19 Department of Emergency Medicine  
20 University of California, San Francisco  
21 1001 Potrero Ave, 1E21, San Francisco General Hospital  
22 San Francisco, CA 94110  
23 Tel: (415) 572-6779  
24 Fax: (415) 206-5818  
25 Renee.hsia@emergency.ucsf.edu  
26

27  
28 Yaa Akosa Antwi, PhD  
29 Department of Economics  
30 Indiana University Purdue University – Indianapolis  
31 425 University Boulevard, Cavanaugh Hall, Room 516□  
32 Indianapolis, IN 46202  
33 yakosaan@iupui.edu  
34

35  
36 Ellerie Weber, PhD  
37 RAND-University of Pittsburgh Health Institute-Carnegie Mellon University  
38 5000 Forbes Ave, Hamburg Hall□  
39 Pittsburgh, PA 15213  
40 elleries@cmu.edu  
41

42  
43 Emilio Galan, BS  
44 UC Berkeley – UCSF Joint Medical Program  
45 570 University Hall #1190□  
46 University of California, Berkeley□94720  
47 egalan@berkeley.edu  
48  
49

50  
51  
52  
53 Keywords: hospital charges, obstetrics, cesarean section, health services research  
54  
55  
56  
57  
58  
59  
60

## Abstract

*Objective:* To examine the between-hospital variation of charges and discounted prices for uncomplicated vaginal and cesarean section deliveries, and determine the institutional and market-level characteristics that influence adjusted charges.

*Design, Setting, and Participants:* Using data from the California Office of Statewide Health Planning and Development (OSHPD), we conducted a cross-sectional study of all privately insured patients admitted to California hospitals in 2011 for uncomplicated vaginal delivery (DRG 775) or uncomplicated cesarean section (DRG 766).

*Outcome Measures:* Hospital charges and discounted prices adjusted for each patient's clinical and demographic characteristics.

*Results:* We analyzed 76,766 vaginal deliveries and 32,660 cesarean sections in California in 2011. After adjusting for patient demographic and clinical characteristics, we found that the average California woman could be charged as little as \$3,296 or as much as \$37,227 for a vaginal delivery, and \$8,312 - \$70,908 for a cesarean section depending on which hospital she was admitted to. The discounted prices were, on average, 37% of the charges. We found that hospitals in markets with middling competition had significantly lower adjusted charges for vaginal deliveries, while hospitals with higher wage indices and case mixes, as well as for-profit hospitals, had higher adjusted charges. Government hospitals charged significantly less for cesarean sections, while hospitals in markets with higher uninsurance rates charged more. However, the institutional and market level factors included in our models explained only 35-36% of the between-hospital variation in charges.

*Conclusions:* These results indicate that charges and discounted prices for two common, relatively homogeneous diagnosis groups – uncomplicated vaginal delivery and cesarean section – vary widely between hospitals and are not well explained by observable patient or hospital characteristics.

## Article Summary

### *Article focus:*

- Wide variation in both hospital charges and payment rates has been documented by past studies. However, few studies attempt to explain such variation for episodes of care.
- We aimed to (1) document the variation in charges and discounted prices between California hospitals for the same, average woman's hospital stay for a vaginal birth or cesarean section, and (2) analyze whether hospital or market characteristics could explain that between-hospital variation in charges.

### *Key messages:*

- After adjusting for patient clinical and demographic characteristics, charges for the average California mother's uncomplicated vaginal birth ranged from \$3,296 to \$37,227 depending on which of the 198 hospitals she visited; adjusted charges for cesarean sections ranged from \$8,312 to \$70,908.
- Discounted prices were 37% of charges, on average (range: 5% - 92%)
- For-profit hospitals, hospitals in areas with high costs of living, and hospitals with more severe case-mixes charged more than their counterparts; however, only 35-36% of charges were explained by the observable hospital and market characteristics in our models.

### *Strengths and limitations of this study:*

- Uses a comprehensive dataset of all visits to California hospitals and links to patient and institutional characteristics, allowing for isolation of between-hospital variation and analysis over a complete population.
- Limitations include use of aggregate discount rates to estimate discounted prices paid, potential residual patient-level variation in care intensity, and inability to completely capture hospital quality.

**Funding Statement:**

This work was supported by the National Center for Advancing Translational Sciences, National Institutes of Health, through UCSF-CTSI Grant Number KL2 TR000143 (R.Y.H), the Robert Wood Johnson Foundation Physician Faculty Scholars Program (R.Y.H.), and a UCSF Center for Healthcare Value grant. The funding sponsors played no part in the design and conduct of the study; collection, management, analysis and interpretation of the data; and preparation, review, or approval of the manuscript. Its contents are solely the responsibility of the authors and do not necessarily represent the official views of any of the funding agencies.

**Competing Interests:**

None of the authors have any competing interests to report.

## BACKGROUND

Healthcare expenditures in 2011 totaled \$2.7 trillion dollars - 17.7% of US GDP – and are projected to rise steeply in future years.<sup>1</sup> Unlike most other industries, the way healthcare is priced and paid for is notoriously opaque, making it difficult for patients to act as consumers.<sup>2</sup> At a time when out of pocket payments for healthcare are increasing,<sup>3</sup> and growing numbers of “consumer directed” high deductible health plans put more pressure on patients to make cost-efficient healthcare decisions,<sup>4,5</sup> the opacity of the system is becoming an even greater concern.

Recently, hospital charges have come to the forefront of political, popular, and medical discourse due to their seemingly inexplicable magnitude and devastating effects on specific patients.<sup>6-8</sup> While insurers typically negotiate lower reimbursements, these full, inflated charges are still billed to the 22% of American adults aged 19-64 who are uninsured and to privately insured patients receiving care out of network,<sup>9,10</sup> contributing to the 57% of US bankruptcies that are due to medical bills.<sup>11</sup> Further, charges are the basis of price negotiations with many private insurers,<sup>7,12,13</sup> involved in inpatient diagnosis group weighting and outlier payments by Medicare,<sup>14-17</sup> and used in calculations of uncompensated care, which affect hospital non-profit status.<sup>18,19</sup>

Yet despite their consistent use in many forms of healthcare price setting and hospital bills, charges appear to be nearly random, and are either based on outdated, historical methods or set using opaque idiosyncratic proprietary formulas.<sup>12,13,20</sup> One hospital administrator called his hospital’s method of setting charges “madness.”<sup>21</sup> The academic literature has supported this assumption; studies have documented the wide variation in hospital and physician charges and payment rates for the average inpatient stay.<sup>22</sup> Past economics literature has attempted to discern some method to charge setting by documenting the relationship between hospital payment rates

1  
2  
3 and industry organization, and has found for example that less competitive markets have higher  
4 predicted prices.<sup>23 24</sup> These studies, however, have mostly addressed broad price indexes based on  
5 aggregate hospital charges.  
6  
7  
8  
9

10 Given the wide range of procedures and diagnoses that comprise hospitals' inpatient  
11 censuses, it is important to evaluate specific, common episodes of care that should have less  
12 variation in charges, and are more relevant to patients presenting with a complaint and no  
13 knowledge of the specific services they will need. An ideal service is childbirth, the most  
14 common reason for hospitalizations in the US,<sup>25</sup> accounting for 4.2 million inpatient stays and  
15 \$16.1 billion in hospital costs in 2008.<sup>26</sup> Recently, a study by Truven Health Analytics looked at  
16 both charges and discounted prices nationally for vaginal and cesarean childbirth using their own  
17 proprietary database of paid medical claims, finding significant variation of both charge and  
18 reimbursement.<sup>27</sup> However, the study does not address the possible sources of the variation in  
19 charges that it documents.  
20  
21  
22  
23  
24  
25  
26  
27  
28  
29  
30  
31  
32  
33

34 In this study, we sought to fill this gap by documenting and attempting to explain  
35 between-hospital variation in charges for the same, average woman's inpatient stay for vaginal  
36 birth or cesarean section in California – relatively homogeneous episodes of care. We first predict  
37 charges and estimated prices paid at each hospital after adjusting for patient characteristics, and  
38 then determine if hospital or market-level characteristics can explain some of this charge variation.  
39  
40  
41  
42  
43  
44  
45  
46  
47

## 48 **METHODS**

### 49 **Data Source**

50 We used the 2011 California Office of Statewide Health Planning and Development  
51 (OSHPD) Patient Discharge Public Data Set (PDD) to perform our cross-sectional analysis. The  
52  
53  
54  
55  
56  
57  
58  
59  
60

OSHPD PDD captures patient demographic and clinical information, along with charges, for each inpatient encounter at California hospitals. OSHPD masks selective patient information in this public dataset to prevent identification of individuals pursuant to the California Health Data and Advisory Council Consolidation Act, Health and Safety Code section 128675 et seq. Our study was exempt from review by the Committee on Human Research at the University of California, San Francisco because we used a public data source that was masked for identifiers.

To capture hospital-level characteristics, we used OSHPD's hospital financial and utilization files for 2011. We also used the 2009 Area Resources File,<sup>28</sup> the most currently available year, to obtain county-level area percent of uninsurance and poverty, and the Impact Files from the Centers for Medicare & Medicaid Services (CMS), to obtain hospital wage index.<sup>29</sup>

### Sample Selection

We limited our study to adult women ( $\geq 18$  years old) who were admitted for diagnosis-related group (DRG) of 775 (uncomplicated vaginal delivery) or 766 (uncomplicated Cesarean section) at short-term general California hospitals. We also only included privately insured women, as our estimated discount rate only applies to them. Patients admitted to federal hospitals (e.g. Veterans Administration hospitals) are not in our data as OSHPD reporting requirements do not apply to such hospitals. Also, women who receive care through the Kaiser Permanente network are absent, as they do not report charges to the state.

To restrict our sample to a relatively healthy and more homogenous population, we excluded patients who died in the hospital or who did not have a routine discharge. We further excluded patients without a valid age group or gender recorded, as we could not accurately adjust for their demographic predictors of charge. We also excluded patients with invalid charges, those



1  
2  
3 receiving charity care, and those with charges exceeding the cell size limit. Finally, we excluded  
4 patients visiting hospitals that did not report a wage index. See Figure 1 for a full description of  
5 the applied exclusions.  
6  
7  
8  
9

## 10 11 12 **Outcome**

13  
14  
15 Our first outcome was hospital charges, which are the total dollar amounts billed by the  
16 hospital for each admission, excluding physician fees. These charges reflect the hospital's full,  
17 established rates before contractual adjustments and prepayments.  
18  
19

20  
21  
22 Our secondary outcome was estimated discounted prices, or the amounts which hospitals  
23 received from private insurers for the services their enrollees received. We obtained this by  
24 multiplying the hospital charge by the average hospital discount for privately insured patients. As  
25 done in previous literature, this discount factor for privately insured patients was calculated using  
26 the formula:  $(\text{gross inpatient revenue} + \text{gross outpatient revenue} - \text{contractual adjustments}) / (\text{gross}$   
27  $\text{inpatient revenue} + \text{gross outpatient revenue})$ .<sup>23 30</sup> We obtained these amounts through the 2011  
28 OSHPD financial files for each hospital.  
29  
30  
31  
32  
33  
34  
35  
36  
37  
38  
39  
40

## 41 **Statistical analysis**

42  
43 Our analysis is similar to the two-stage approach used by previous economic analyses.<sup>31</sup>  
44 We performed separate analysis for each DRG. In the first stage, to control for patient-level  
45 variation in charges, we regressed raw charges on patient characteristics including age (in two  
46 categories: 18-34, and  $\geq 35$ ), number of conditions present on admission, Charlson comorbidities,  
47 and length of stay. Because length of stay is often right-skewed, we transformed it to log (length  
48 of stay + 1). We included three different types of private insurance, including two forms of  
49  
50  
51  
52  
53  
54  
55  
56  
57  
58  
59  
60

1  
2  
3 managed care (Knox-Keene/Medi-Cal County Organized Health System, or other), and traditional  
4 private coverage. To control for unobservable within-hospital factors that could affect variation,  
5  
6 we also included a dummy variable for each hospital.  
7  
8  
9

10 From this regression, we then calculated a given hospital's adjusted charge for the average  
11 statewide patient for that DRG, where the adjusted charges represented standardized log  
12 charge/(day + 1). This gave us a single adjusted charge for each hospital, representing the  
13 predicted charge for a patient with the same, average clinical and demographic characteristics,  
14 which we then used as the dependent variable in our second-stage regression.  
15  
16  
17  
18  
19  
20  
21

22 In the second stage, we regressed our adjusted charges on hospital and market level factors  
23 cited by previous literature as related to broad price indices,<sup>23 31 32</sup> to determine which  
24 characteristics explain observed between-hospital variation in charges for childbirth. Hospital-  
25 level factors included ownership (not-for-profit, for-profit, government), teaching status,  
26 urban/rural location, capacity (number of licensed beds), patient payer mix (proportion Medicare,  
27 Medicaid), and case-mix (which was used to adjust the average cost per patient for a given  
28 hospital relative to the adjusted average cost for other hospitals).<sup>33</sup> We also incorporated three  
29 quality measures from the Agency for Healthcare Research Quality's Inpatient Quality Indicators  
30 (IQIs): cesarean delivery rate, vaginal birth after cesarean rate (uncomplicated), and primary  
31 caesarian delivery rate.<sup>34</sup> These utilization indicators are intended to capture either over-use of  
32 procedures found to be unnecessary or low quality, or under-use of procedures with merit, such as  
33 vaginal birth after prior cesarean delivery.<sup>35</sup> We further incorporated market-level factors  
34 including wage index, percent uninsured in the county, percent below the poverty line in the  
35 county, as well as the system-wide Herfindahl-Hirschman Index (HHI).  
36  
37  
38  
39  
40  
41  
42  
43  
44  
45  
46  
47  
48  
49  
50  
51  
52  
53  
54  
55  
56  
57  
58  
59  
60

1  
2  
3 The HHI is a widely used economic measure of degree of competition faced by a company,  
4  
5 or in this case hospital, within its market.<sup>36</sup> It is calculated as the sum of the squares of market  
6  
7 shares for each hospital in a given market. Higher HHIs are associated with less competition,  
8  
9 while lower HHIs indicate more competitive markets. We calculated these shares of patients  
10  
11 directly from the hospital discharge data. Our HHI calculation also accounts for membership in a  
12  
13 hospital system, which has been shown to influence hospital price setting.<sup>32</sup>  
14  
15  
16  
17  
18  
19

## 20 RESULTS

### 21 Sample

22 We analyzed a sample of 76,766 uncomplicated vaginal deliveries, and 32,660  
23  
24 uncomplicated cesarean sections in 2011 across California. As shown in Table 1, 78.4% of  
25  
26 women with uncomplicated vaginal deliveries were between the ages of 18-34, and 97.9% had a  
27  
28 Charlson comorbidity index of 0, indicating that they were relatively healthy. The length of stay  
29  
30 for 77.8% of these women was less than 3 days. For the 32,660 women with uncomplicated  
31  
32 Cesarean sections (Table 2), the majority (69.5%) were again between ages 18-34, almost all  
33  
34 (97.2%) had a Charlson comorbidity index of 0, and 77.5% had a hospital stay between 3 to 6  
35  
36 days. For both DRGs, the majority of hospitals were not-for-profit, non-teaching hospitals located  
37  
38 in urban areas.  
39  
40  
41  
42  
43  
44  
45  
46  
47

### 48 Charges

49 We found that the raw charges for uncomplicated vaginal birth ranged from \$3,344 to  
50  
51 \$43,715, with a median charge of \$15,278 (IQR \$7,981). Once adjusted for patient clinical and  
52  
53 demographic characteristics, charges for the average patient ranged from \$3,296 to \$37,227,  
54  
55  
56  
57  
58  
59  
60

1  
2  
3 depending on which of the 198 hospitals she visited (median \$14,620; IQR \$7,643). For  
4  
5 uncomplicated Cesarean sections, the raw charges ranged from \$7,905 to \$72,569, with a median  
6  
7 charge of \$27,517 (IQR \$14,206). Adjusted charges ranged from \$8,312 to \$70,908 with a  
8  
9 median charge of \$27,481 (IQR \$12,525), again for a patient with the same average  
10  
11 characteristics.  
12  
13

### 14 15 16 17 **Estimated discounted price**

18  
19  
20 Discounted prices paid by private insurers ranged from 5% to 92% of the charge, with an  
21  
22 average of 37%. Discounted prices for vaginal deliveries ranged from \$835 to \$12,873 (median  
23  
24 \$5,123; IQR \$3,827), and prices for cesarean sections varied from \$1,135 to \$28,105 (median  
25  
26 \$9,640; IQR \$6,631). For vaginal births, the largest difference between a hospital's adjusted  
27  
28 charge and estimated discount price was \$29,217, where it charged \$33,593 for an average patient,  
29  
30 almost eight times the \$4,376 it finally received from insurers. The smallest difference was just  
31  
32 \$920, where the hospital's average charge (\$11,251) was a mere 109% higher than its estimated  
33  
34 price (\$10,332). For uncomplicated Cesarean sections, the differences were even more dramatic –  
35  
36 one hospital charged 1899% of what it typically received, while another charged 124%. Figure 2  
37  
38 illustrates the differences between the adjusted charges and discounted prices for each hospital in  
39  
40 our dataset for the two conditions.  
41  
42  
43  
44  
45  
46  
47

### 48 49 **Hospital and market-level factors**

50  
51 In the multivariate model using adjusted charges across hospitals as the dependent  
52  
53 variable, for uncomplicated vaginal delivery, hospitals with for-profit ownership, severe case-  
54  
55 mixes, and high wage indices charged significantly more than their counterparts (Table 3).  
56  
57  
58  
59  
60

1  
2  
3 For uncomplicated Cesarean section (Table 4), again charge was associated with  
4 ownership. Government-owned hospitals had 14.6% lower charges (95% CI -29.8, 0.6), while  
5 for-profit hospitals had 17.2% higher charges (95% CI 3.2, 31.2) than non-profit hospitals. This  
6 implies that if the mean charge for uncomplicated Cesarean section, \$29,480, was offered at a  
7 non-profit hospital, the adjusted charge in a government hospital would be \$25,176 and the  
8 adjusted charge in a for-profit hospital would be \$34,551. Also similar to our findings with  
9 uncomplicated vaginal births, hospitals with higher labor costs (wage index) had higher charges.  
10 The case-mix was no longer predictive, but a higher rate of percent uninsured in the county was  
11 significantly correlated with higher charges. Though the significance was marginal, the proportion  
12 of patients covered by Medicare was also associated with higher charges.  
13  
14  
15  
16  
17  
18  
19  
20  
21  
22  
23  
24  
25  
26  
27  
28

## 29 DISCUSSION

30  
31 Our results demonstrate the wide variability of charges and prices for childbirth between  
32 hospitals, even after controlling for patient characteristics, and point to specific institutional and  
33 market-level factors that affect those standardized charges. Even after adjusting for patient  
34 demographic and clinical characteristics, we found that charges for vaginal births ranged from  
35 \$3,296 to \$37,227, and charges for cesarean sections ranged from \$8,312 to \$70,908, depending  
36 only on which hospital the average California woman giving birth visited. That implies that, after  
37 adjusting for patient characteristics, the highest hospital charge was more than 11 times that of the  
38 lowest hospital charge for vaginal births, and more than 8.5 times that of the lowest hospital  
39 charge for cesarean section births. Without adjusting for patient characteristics, the hospital with  
40 the highest charges would charge about 13 times more than the hospital with the lowest charges  
41 for vaginal births, and about 9 times more than the hospital with the lowest charges for cesarean  
42  
43  
44  
45  
46  
47  
48  
49  
50  
51  
52  
53  
54  
55  
56  
57  
58  
59  
60

1  
2  
3 sections. While the variation of adjusted charges is, as expected, smaller than the variation in raw  
4  
5 charges between hospitals, the very small difference between the two implies that service-  
6  
7 intensity and patient observable factors provide little explanation for variation in charges between  
8  
9 hospitals.  
10

11  
12 Our findings show that some hospital and market-level factors, on the other hand, do  
13  
14 clearly impact the differences in charges between hospitals. We find a positive relationship  
15  
16 between charges for childbirth and hospital wage index, case-mix index, for-profit ownership and  
17  
18 county percent uninsured. However, it is probably more notable how *few* of the hospital and  
19  
20 market-level regressors are significant in explaining the variation. Our vaginal and cesarean  
21  
22 delivery models account for only 36% and 35%, respectively, of the variation observed between  
23  
24 hospitals in adjusted charges. This implies that either the variation is a result of (a) unobservable  
25  
26 hospital characteristics or (b) pure noise.  
27  
28  
29  
30

31  
32 Based on findings from past literature, we hypothesize that the pure noise explanation is  
33  
34 more likely. A MedPAC study of hospitals found that many items on chargemasters were based  
35  
36 on historical prices, which were formulated before it was possible to accurately estimate costs.<sup>20</sup>  
37  
38 Even today, the survey found that only a third of hospitals reported any concern regarding  
39  
40 covering operating costs when updating their chargemasters. Rather, most were concerned with  
41  
42 conforming to regulations and maintaining their overall bottom line.<sup>20</sup> Today, even for new  
43  
44 services providers are not incentivized to set charges based on costs, because third party payments  
45  
46 are largely not based on true costs for a given service.<sup>12 22</sup> This therefore precludes a valuable  
47  
48 correlation between cost and charge and thus an anchor on which charge variation would be  
49  
50 limited.<sup>12</sup> In addition, the current miscorrelation is exacerbated by simplistic “updates” in the  
51  
52 form of across the board percentage increases of charges, often resulting in certain services  
53  
54  
55  
56  
57  
58  
59  
60

1  
2  
3 subsidizing others to manage the overall solvency of the hospital or department.<sup>12 20 37</sup> Thus, our  
4  
5 results again confirm the documented lack of comprehensible or at least measurable sense in the  
6  
7 chargemaster system.  
8  
9

10 The troubling part of this largely random variation is that charges do still matter to patients  
11 and to hospitals in many ways. The 41.9 million uninsured Americans, along with privately  
12 insured patients visiting an out of network hospital may be faced with the full charges for their  
13 care, which are typically so high that few patients can pay them, resulting in need for charity care,  
14 sliding scale payments, or often bad debt on the patient's part.<sup>13 38</sup> In addition, as some private  
15 insurers still negotiate discounts off charges, especially in fee for service systems, and use charges  
16 to benchmark the relative weights of their prospective payment systems, higher charges can lead  
17 to higher out of pocket payments for patients.<sup>3 12 13</sup> Medicare also compares charges between  
18 DRG groups modified by cost-to-charge ratios calculated at the cost center level to determine the  
19 relative weight of DRG's and identify qualifying outlier payments within DRGs.<sup>14-17</sup> Finally,  
20 many hospitals use charges to calculate their uncompensated care costs, which affect their not-for-  
21 profit and hence tax exempt status. In fact, the IRS found that 18-20% of hospitals include the  
22 difference between charges and allowed payments by private insurers, and 50% include the  
23 difference between charges and payments received from the uninsured in their uncompensated  
24 care calculations.<sup>18 19</sup>  
25  
26  
27  
28  
29  
30  
31  
32  
33  
34  
35  
36  
37  
38  
39  
40  
41  
42  
43  
44  
45

46 A secondary finding in this study is the large discrepancy between hospitals' predicted  
47 charges and their estimated discounts. Our finding of an average 37% discount is supported by  
48 previous literature showing that private insurers pay on average 39% of the charge for hospital  
49 inpatient services.<sup>39 40</sup> We estimated median payments of \$5,123 for vaginal and \$9,640 for  
50 cesarean section births, slightly lower than the Truven estimates of \$8,519 and \$12,894,  
51  
52  
53  
54  
55  
56  
57  
58  
59  
60

1  
2  
3 respectively.<sup>27</sup> The difference between the adjusted charge and discounted price estimates what  
4 could be considered “excess charges”, and in 2011 sums to \$1.36 billion dollars for all  
5 uncomplicated vaginal and cesarean births in California (\$760.1 million for uncomplicated  
6 vaginal deliveries; \$601.1 million for uncomplicated cesarean sections).  
7  
8  
9  
10  
11

12  
13 Past literature has speculated two reasons for high charges relative to reimbursements.  
14 First is the change in Medicare’s reimbursement protocol from the historical cost-plus  
15 reimbursement system to today’s prospective payment system.<sup>37</sup> Because providers were paid a  
16 percentage above the charged rate, it was in the providers’ financial interest to maintain exorbitant  
17 charges, a practice that has persisted despite the change in reimbursement. Second, in fee for  
18 service payments for which reimbursements are simple discounts of charges, hospitals are  
19 incentivized to raise their charges in an effort to increase reimbursement. Finally, hospitals may  
20 be setting artificially inflated charges to increase the nominal value of their uncompensated care  
21 indices, which are based on charges.<sup>19 41</sup>  
22  
23  
24  
25  
26  
27  
28  
29  
30  
31  
32  
33  
34  
35  
36

### 37 **Limitations of Research**

38  
39 There are several limitations of this study. First, we used DRGs to determine what  
40 constituted an episode of care. The MS-DRG system was designed to classify patients into groups  
41 based on likely utilization of services and accumulation of costs. However, because the  
42 administrative data we used does not provide charge itemization, it is very likely that some  
43 women received greater “intensity” of services in unobservable ways. For instance, if one woman  
44 received an epidural, and another woman did not, we might expect the woman with the epidural  
45 to have higher charges. As much as possible, we are minimizing fallout from this limitation by  
46 using observable attributes of the episode (e.g. length-of-stay, discharge, comorbidities) in our  
47  
48  
49  
50  
51  
52  
53  
54  
55  
56  
57  
58  
59  
60



1  
2  
3 first-stage regression, which should absorb some of the patient-level differences in care intensity.  
4  
5 It is possible, however, that if unobservable patient characteristics affecting intensity of care are  
6  
7 correlated with hospital characteristics, we might expect our second stage estimates to be biased.  
8  
9  
10 On the other hand, if treatment intensity is a hospital- level characteristic, then our analysis does  
11  
12 accurately capture this.  
13  
14

15  
16 Second, our brief analysis of discounted prices is limited by the fact that we must estimate  
17  
18 discount rates, since insurers and providers carefully guard their actual payment rates as  
19  
20 proprietary. The financial data we used is self-reported, and thus the accuracy of our estimates is  
21  
22 dependent on the accuracy of hospital reporting to OSHPD. However, inaccuracies are not a big  
23  
24 concern as OSHPD performs systematic financial audits of their data. Further, the discount rates  
25  
26 are hospital-wide and aggregate across all insurers, while negotiations regarding discount rates  
27  
28 granted by a given hospital may vary widely by particular insurer and according to DRG or cost  
29  
30 center. It is partly because of this significant limitation that we chose to focus our main results on  
31  
32 charges and the factors affecting them. That said, our estimated prices were roughly consistent  
33  
34 with the Truven study, which did have access to claims-based prices paid.<sup>27</sup> In addition,  
35  
36 discounted rates negotiated by insurers have been found to be broadly applied to wide swaths of  
37  
38 services, as the main goal of such negotiations is overall solvency.<sup>42</sup> Further, modifications to  
39  
40 charges at the aggregate level are regularly used in institutional practice, such as cost to charge  
41  
42 ratios used by Centers for Medicare and Medicaid Services (CMS) to estimate outlier payments,  
43  
44 which have been shown to be imperfect but generally appropriate estimates of cost.<sup>43</sup>  
45  
46  
47  
48  
49

50  
51 Third, our study only examines charges in California. Though California is a large, diverse  
52  
53 state, our results cannot be generalized to the entire nation. Last, our study could not examine the  
54  
55 full effect of quality of care on hospital price premiums, though we included select quality  
56  
57  
58  
59  
60

1  
2  
3 indicators. However, it is difficult to imagine that these variations could be attributed entirely to  
4  
5 quality, given numerous studies demonstrating that both charges and payments are unrelated to  
6  
7 quality, which we similarly found in our analysis of three quality measures.<sup>44 45</sup>  
8  
9

## 10 11 12 13 **CONCLUSIONS**

14  
15 For the same average patient in California, we find that charges for uncomplicated vaginal  
16  
17 delivery ranged from \$3,296 to \$37,227 (median: \$14,620), and charges for uncomplicated  
18  
19 cesarean section ranged from \$8,312 to \$70,908 (median: \$27,481) depending on which hospital  
20  
21 she visited. Hospital ownership, case-mix, wage index, percent uninsured in the county, and  
22  
23 market competitiveness had a significant impact on these adjusted charges. Estimated discounted  
24  
25 prices averaged 37% of the adjusted charges. Our findings indicate that the charge faced by a  
26  
27 patient for a common obstetrical procedure is significantly influenced by institutional and market-  
28  
29 level factors outside of her own presentation, but that the majority of variation in charges between  
30  
31 hospitals she could visit remains unexplained. Our results also suggest significant room for  
32  
33 improved methodologies, incentives, and policy interventions for accurately estimating and  
34  
35 presenting charges and ultimate costs.  
36  
37  
38  
39  
40  
41  
42  
43  
44  
45  
46  
47  
48  
49  
50  
51  
52  
53  
54  
55  
56  
57  
58  
59  
60

### Authors' Contributions

RYH conceived of the study, obtained the data, directed and interpreted the analyses, and helped draft and edit the manuscript. YAA helped conceive the study design, analyzed the data, interpreted the results, and edited the manuscript. EW analyzed the data and interpreted the results, and helped with editing of the manuscript. EG conducted background research, helped in interpreting the results, drafted the manuscript, and assisted in editing. All authors have read and approved the final manuscript.

### Acknowledgements

We especially thank Julia Brownell, BA, for her editorial assistance.

**REFERENCES:**

1. Centers for Medicare and Medicaid Service, Office of the Actuary. *National Health Expenditure Projections 2011-2021*; 2011.
2. Government Accountability Office (GAO). Meaningful Price Information Is Difficult for Consumers to Obtain Prior to Receiving Care. GAO-11-791; 2011.
3. Truffer CJ, Keehan S, Smith S, Cylus J, Sisko A, Poisal JA, et al. Health spending projections through 2019: the recession's impact continues. *Health Aff(Millwood)* 2010;**29**:522-29.
4. The Kaiser Family Foundation, Health Research & Educational Trust. Employer Health Benefits 2012 Annual Survey; 2012.
5. Robinson JC, Ginsburg PB. Consumer-driven health care: promise and performance. *Health Aff(Millwood)* 2009;**28**:w272-81.
6. Brill S. Bitter Pill: Why Medical Bills Are Killing Us. *TIME Magazine*. Feb 20, 2013.
7. Selberg J, Marks CM. A Problem Too Big to See: The Sobering Reality of Hospital Pricing: Institute for Healthcare Improvement, 2013.
8. Salam R. Guest Post by Oren Cass: What Steven Brill Gets Wrong on U.S. Health Care Costs. *The National Review Online*. Feb 28, 2013.
9. Anderson GF. From 'Soak The Rich' To 'Soak The Poor': Recent Trends In Hospital Pricing. *Health Aff (Millwood)* 2007;**26**:780-89.
10. DeNavas-Walt C, Proctor B, Smith J. Income, Poverty, and Health Insurance Coverage in the United States: 2011. *Current Population Reports*. U.S. Census Bureau. Washington, D.C.; 2012.
11. Himmelstein DU, Thorne D, Warren E, Woolhandler S. Medical Bankruptcy in the United States, 2007: Results of a National Study. *Am J Med* 2009;**122**:741-46.
12. Ginsburg PB, Grossman JM. When the price isn't right: how inadvertent payment incentives drive medical care. *Health Aff (Millwood)* 2005;W5.
13. Reinhardt UE. The Pricing Of U.S. Hospital Services: Chaos Behind A Veil Of Secrecy. *Health Aff (Millwood)* 2006;**25**:57-69.
14. Medicare Program; Change in Methodology for Determining Payment for Extraordinarily High-Cost Cases (Cost Outliers) Under the Acute Care Hospital Inpatient and Long-Term Care Hospital Prospective Payment Systems; Final Rule. 68 *Federal Register* 110. (June 9, 2003):34494-504.
15. Medicare Program; Changes to the Hospital Inpatient Prospective Payment Systems and Fiscal Year 2007 Rates; Fiscal Year 2007 Occupational Mix Adjustment to Wage Index;

- 1  
2  
3 Health Care Infrastructure Improvement Program; Selection Criteria of Loan Program for  
4 Qualifying Hospitals Engaged in Cancer-Related Health Care and Forgiveness of  
5 Indebtedness; and Exclusion of Vendor Purchases Made Under the Competitive  
6 Acquisition Program (CAP) for Outpatient Drugs and Biologicals Under Part B for the  
7 Purpose of Calculating the Average Sales Price (ASP); Final Rules & Interim Final Rule  
8 With Comment Period. *71 Federal Register* 160. (August 18, 2006):47870 -8351.  
9  
10
- 11 16. Medicare Program; Proposed Changes to the Hospital Inpatient Prospective Payment Systems  
12 and Fiscal Year 2009 Rates; Proposed Changes to Disclosure of Physician Ownership in  
13 Hospitals and Physician Self-Referral Rules; Proposed Collection of Information  
14 Regarding Financial Relationships Between Hospitals and Physicians; Proposed Rule. *73*  
15 *Federal Register* 84. (April 30, 2008):23542-47.  
16  
17
- 18 17. Carter GM, Rogowski JA. The Hospital Relative Value Method as an Alternative for  
19 Recalibrating DRG Relative Weights: RAND/UCLA/Harvard Center for Health Care  
20 Financing Policy Research; 1993.  
21  
22
- 23 18. Internal Revenue Service. IRS Exempt Organizations (TE/GE) Hospital Compliance Project  
24 Final Report; 2006:98.  
25  
26
- 27 19. Capps C, David G, Carlton D. Antitrust Treatment of Nonprofits: Should Hospitals Receive  
28 Special Care? *University of Chicago George J. Stigler Center for the Study of the*  
29 *Economy and the State Working Paper*. 2010.  
30
- 31 20. Dobson AJ, DaVanzo J, Doherty J, Tanamor M. A Study of Hospital Charge Setting  
32 Practices: Lewin Group; 2005.  
33
- 34 21. Lagnado L. California Hospitals Open Books, Showing Huge Price Differences. *Wall Street*  
35 *Journal*. December 27, 2004.  
36  
37
- 38 22. Ginsburg PB. Wide variation in hospital and physician payment rates evidence of provider  
39 market power: Center for Studying Health System Change; 2010.  
40
- 41 23. Gaynor M, Vogt WB. Competition among hospitals: National Bureau of Economic Research  
42 Working Paper #9471; 2003.  
43  
44
- 45 24. Melnick GA, Zwanziger J, Bamezai A, Pattison R. The effects of market structure and  
46 bargaining position on hospital prices. *J Health Econ* 1992;**11**:217-33.  
47
- 48 25. Vashi AA, Fox JP, Carr BG, D'Onofrio G, Pines JM, Ross JS, et al. Use of hospital-based  
49 acute care among patients recently discharged from the hospital. *JAMA* 2013;**309**:364-71.  
50
- 51 26. Podulka J, Stranges E, Steiner C. Hospitalizations Related to Childbirth, 2008: Statistical  
52 Brief #110: Agency for Healthcare Research and Quality; 2011.  
53  
54
- 55 27. Truven Health Analytics. The Cost of Having a Baby in the United States; 2013.  
56  
57
- 58 28. Health Resources and Services Administration. Area Resource File; 2009.  
59  
60

- 1  
2  
3 29. Centers for Medicare and Medicaid Services. Historical Impact Files; 2011.  
4  
5  
6 30. Dranove D, Lindrooth R, White WD, Zwanziger J. Is the impact of managed care on hospital  
7 prices decreasing? *J Health Econ* 2008;**27**:362-76.  
8  
9 31. Keeler E, Melnick G, Zwanziger J. The changing effects of competition on non-profit and for-  
10 profit hospital pricing behavior. *J Health Econ* 1999;**18**:69-86.  
11  
12 32. Melnick G, Keeler E. The effects of multi-hospital systems on hospital prices. *J Health Econ*  
13 2007;**26**:400-13.  
14  
15 33. California Office of Statewide Health Planning and Development. Calculation of the Office of  
16 Statewide Health Planning and Development's (OSHPD) Case Mix Index (CMI).  
17 [http://www.oshpd.ca.gov/HID/Products/PatDischargeData/CaseMixIndex/CMI/ExampleC](http://www.oshpd.ca.gov/HID/Products/PatDischargeData/CaseMixIndex/CMI/ExampleCalculation.pdf)  
18 [alculation.pdf](http://www.oshpd.ca.gov/HID/Products/PatDischargeData/CaseMixIndex/CMI/ExampleCalculation.pdf) (accessed 15 March 2013)  
19  
20  
21 34. Agency for Healthcare Research and Quality. Inpatient Quality Indicators Technical  
22 Specifications, Version 4.4, 2012. (accessed 15 March 2013):  
23 [http://www.qualityindicators.ahrq.gov/Modules/IQI\\_TechSpec.aspx](http://www.qualityindicators.ahrq.gov/Modules/IQI_TechSpec.aspx)  
24  
25  
26 35. Davies SM, Geppert JJ, McClellan M, McDonald KM, Romano PS, Shojania KG. Refinement  
27 of the HCUP Quality Indicators: Agency for Healthcare Research and Quality. AHRQ  
28 Publication No. 01-0035, 2001.  
29  
30 36. US Department of Justice and the Federal Trade Commission. Horizontal Merger Guidelines.,  
31 2010. <http://www.justice.gov/atr/public/guidelines/hmg-2010.html> (accessed 15 March  
32 2013)  
33  
34  
35 37. Kaplan RS, Porter ME. How to solve the cost crisis in health care. *Harvard Business Review*  
36 2011;**89**:46-52.  
37  
38 38. Reinhardt U. What Hospitals Charge the Uninsured. *The New York Times*. New York, NY;  
39 March 15, 2013. In: *Economix* [blog].  
40 <http://economix.blogs.nytimes.com/2013/03/15/what-hospitals-charge-the-uninsured/>  
41 (accessed 1 April 2013)  
42  
43  
44 39. Ginsburg PB. Shopping for price in medical care. *Health Aff (Millwood)* 2007;**26**:w208-16.  
45  
46 40. Tompkins CP, Altman SH, Eilat E. The precarious pricing system for hospital services.  
47 *Health Aff (Millwood)* 2006;**25**:45-56.  
48  
49 41. David G, Helmchen LA. The Role of Task Adhesion in Limiting Specialization along the  
50 Medical Care Continuum. *Labour* 2011;**25**:24-44.  
51  
52 42. Reinhardt U. How Do Hospitals Get Paid? A Primer. *The New York Times* New York, NY;  
53 January 23, 2009. In *Economix* [blog].  
54 <http://economix.blogs.nytimes.com/2009/01/23/how-do-hospitals-get-paid-a-primer/>  
55 (accessed 1 April 2013)  
56  
57  
58  
59  
60

- 1  
2  
3 43. Shwartz M, Young DW, Siegrist R. The ratio of costs to charges: how good a basis for  
4 estimating costs? *Inquiry* 1995;32(4):476-81.  
5  
6  
7 44. Commonwealth of Massachusetts Division of Health Care Finance and Policy.  
8 Recommendations of the Special Commission on Provider Price Reform; 2011.  
9  
10 45. Massachusetts Attorney General. Examination of Health Care Cost Trends and Cost Drivers:  
11 Report for Annual Public Hearing; 2011.  
12  
13  
14  
15  
16  
17  
18  
19  
20  
21  
22  
23  
24  
25  
26  
27  
28  
29  
30  
31  
32  
33  
34  
35  
36  
37  
38  
39  
40  
41  
42  
43  
44  
45  
46  
47  
48  
49  
50  
51  
52  
53  
54  
55  
56  
57  
58  
59  
60

For peer review only

1  
2  
3  
4  
5  
6  
7  
8  
9  
10  
11  
12  
13  
14  
15  
16  
17  
18  
19  
20  
21  
22  
23  
24  
25  
26  
27  
28  
29  
30  
31  
32  
33  
34  
35  
36  
37  
38  
39  
40  
41  
42  
43  
44  
45  
46  
47  
48  
49  
50  
51  
52  
53  
54  
55  
56  
57  
58  
59  
60

## Tables

Table 1. Characteristics of study sample for uncomplicated vaginal deliveries (DRG 775)

| <b>PATIENT-LEVEL CHARACTERISTICS (n=76,766)</b> |          |                |           |
|-------------------------------------------------|----------|----------------|-----------|
| <b>Age categories</b>                           | <b>N</b> | <b>Percent</b> |           |
| 18-34                                           | 60,175   | 78.39%         |           |
| 35-64                                           | 16,591   | 21.61%         |           |
| <b>Sex</b>                                      |          |                |           |
| Male                                            | 0        | 0.00%          |           |
| Female                                          | 76,766   | 100.00%        |           |
| <b>Private Insurance Type</b>                   |          |                |           |
| Managed Care-Knox Keene                         | 34,387   | 44.79%         |           |
| Managed Care-Other                              | 36,414   | 47.44%         |           |
| Traditional Coverage                            | 5,965    | 7.77%          |           |
| <b>Charlson Comorbidity Index</b>               |          |                |           |
| 0                                               | 75,182   | 97.94%         |           |
| 1                                               | 1,555    | 2.03%          |           |
| 2                                               | 29       | 0.03%          |           |
| <b>Length of Stay</b>                           |          |                |           |
| Less than 3 days                                | 59,724   | 77.80%         |           |
| 3-6 days                                        | 16,826   | 21.92%         |           |
| Greater than 6 days                             | 216      | 0.28%          |           |
| <b>HOSPITAL-LEVEL CHARACTERISTICS (n=198)</b>   |          |                |           |
| <b>Ownership</b>                                |          |                |           |
| Government                                      | 32       | 16.16%         |           |
| NFP                                             | 127      | 64.14%         |           |
| FP                                              | 39       | 19.70%         |           |
| <b>Location</b>                                 |          |                |           |
| Urban                                           | 174      | 87.88%         |           |
| Rural                                           | 24       | 12.12%         |           |
| <b>Teaching Status</b>                          |          |                |           |
| Yes                                             | 20       | 10.10%         |           |
| No                                              | 178      | 89.90%         |           |
| <b>Casemix (severity)</b>                       |          |                |           |
|                                                 | <b>N</b> | <b>Mean</b>    | <b>SD</b> |
| Low                                             | 66       | 1.283          | 0.121     |
| Medium                                          | 66       | 1.555          | 0.053     |
| High                                            | 66       | 1.787          | 0.138     |
| <b>Capacity</b>                                 |          |                |           |
| Licensed Beds                                   | 198      | 280.45         | 180.366   |
| <b>Payer Mix</b>                                |          |                |           |
| % Medicare                                      | 198      | 37.79%         | 12.38%    |
| % Medicaid                                      | 198      | 28.13%         | 15.68%    |



| MARKET-LEVEL CHARACTERISTICS      |     |        |       |
|-----------------------------------|-----|--------|-------|
|                                   | N   | Mean   | SD    |
| <b>Wage Index</b>                 |     |        |       |
| Low                               | 121 | 1.196  | 0.007 |
| Medium                            | 12  | 1.223  | 0.01  |
| High                              | 65  | 1.486  | 0.142 |
| <b>Herfindahl-Hirschman Index</b> |     |        |       |
| Low                               | 67  | 1178   | 629   |
| Medium                            | 70  | 3351   | 721   |
| High                              | 61  | 6831   | 1986  |
| <b>% Without Insurance</b>        | 198 | 18.31% | 3.77% |
| <b>% Below Poverty Line</b>       | 198 | 13.80% | 4.41% |

Table 2. Characteristics of study sample for uncomplicated vaginal deliveries (DRG 775)

| <b>PATIENT-LEVEL CHARACTERISTICS (n=32,660)</b> |          |                |           |
|-------------------------------------------------|----------|----------------|-----------|
| <b>Age categories</b>                           | <b>N</b> | <b>Percent</b> |           |
| 18-34                                           | 22,694   | 69.49%         |           |
| 35-64                                           | 9,966    | 30.51%         |           |
| <b>Sex</b>                                      |          |                |           |
| Male                                            | 0        | 0.00%          |           |
| Female                                          | 32,660   | 100.00%        |           |
| <b>Private Insurance Type</b>                   |          |                |           |
| Managed Care-Knox Keene                         | 14,696   | 45.00%         |           |
| Managed Care-Other                              | 15,237   | 46.65%         |           |
| Traditional Coverage                            | 2,727    | 8.35%          |           |
| <b>Charlson Comorbidity Index</b>               |          |                |           |
| 0                                               | 31,756   | 97.23%         |           |
| 1                                               | 894      | 2.74%          |           |
| 2                                               | 10       | 0.03%          |           |
| <b>Length of Stay</b>                           |          |                |           |
| Less than 3 days                                | 7,172    | 21.96%         |           |
| 3-6 days                                        | 25,325   | 77.54%         |           |
| Greater than 6 days                             | 163      | 0.50%          |           |
| <b>HOSPITAL-LEVEL CHARACTERISTICS (n=195)</b>   |          |                |           |
| <b>Ownership</b>                                |          |                |           |
| Government                                      | 30       | 15.38%         |           |
| NFP                                             | 127      | 64.14%         |           |
| FP                                              | 38       | 19.49%         |           |
| <b>Location</b>                                 |          |                |           |
| Urban                                           | 171      | 87.69%         |           |
| Rural                                           | 24       | 12.31%         |           |
| <b>Teaching Status</b>                          |          |                |           |
| Yes                                             | 18       | 9.23%          |           |
| No                                              | 177      | 90.77%         |           |
| <b>Casemix (severity)</b>                       |          |                |           |
|                                                 | <b>N</b> | <b>Mean</b>    | <b>SD</b> |
| Low                                             | 65       | 1.287          | 0.125     |
| Medium                                          | 65       | 1.559          | 0.052     |
| High                                            | 65       | 1.789          | 0.138     |
| <b>Capacity</b>                                 |          |                |           |
| Licensed Beds                                   | 195      | 279.672        | 180.807   |
| <b>Payer Mix</b>                                |          |                |           |
| % Medicare                                      | 195      | 37.94%         | 12.06%    |
| % Medicaid                                      | 195      | 27.96%         | 15.64%    |

| <b>MARKET-LEVEL CHARACTERISTICS</b> |          |             |           |
|-------------------------------------|----------|-------------|-----------|
| <b>Wage Index</b>                   | <b>N</b> | <b>Mean</b> | <b>SD</b> |
| Low                                 | 119      | 1.196       | 0.007     |
| Medium                              | 12       | 1.223       | 0.01      |
| High                                | 64       | 1.484       | 0.142     |
| <b>Herfindahl-Hirschman Index</b>   |          |             |           |
| Low                                 | 72       | 1283        | 713       |
| Medium                              | 59       | 3440        | 591       |
| High                                | 64       | 6809        | 2115      |
| <b>% Without Insurance</b>          | 195      | 18.30%      | 3.66%     |
| <b>% Below Poverty Line</b>         | 195      | 13.77%      | 4.43%     |

Table 3. Regression of adjusted charges on hospital and market characteristics for uncomplicated vaginal deliveries

|                                                      | Multiplicative increase<br>for each unit change in<br>predictor | 95% CI<br>lower<br>bound | 95% CI<br>upper<br>bound | p-value |
|------------------------------------------------------|-----------------------------------------------------------------|--------------------------|--------------------------|---------|
| <b>HOSPITAL-LEVEL CHARACTERISTICS</b>                |                                                                 |                          |                          |         |
| <b>Ownership</b>                                     |                                                                 |                          |                          |         |
| Government                                           | -0.096                                                          | -0.249                   | 0.057                    | 0.217   |
| NFP                                                  | Reference                                                       |                          |                          |         |
| FP                                                   | 0.198                                                           | 0.0475                   | 0.348                    | 0.01    |
| <b>Teaching Status</b>                               |                                                                 |                          |                          |         |
| Yes                                                  | -0.049                                                          | -0.317                   | 0.22                     | 0.719   |
| No                                                   | Reference                                                       |                          |                          |         |
| <b>MSA</b>                                           |                                                                 |                          |                          |         |
| Urban                                                | Reference                                                       |                          |                          |         |
| Rural                                                | 0.022                                                           | -0.144                   | 0.19                     | 0.849   |
| <b>Casemix (severity)</b>                            |                                                                 |                          |                          |         |
| Low                                                  | Reference                                                       |                          |                          |         |
| Medium                                               | 0.104                                                           | -0.044                   | 0.252                    | 0.166   |
| High                                                 | 0.196                                                           | 0.044                    | 0.349                    | 0.012   |
| <b>Capacity</b>                                      |                                                                 |                          |                          |         |
| Licensed beds                                        | 0.0003                                                          | -0.0001                  | 0.0007                   | 0.234   |
| <b>Payer Mix</b>                                     |                                                                 |                          |                          |         |
| Proportion Medicare                                  | 0.263                                                           | -0.352                   | 0.878                    | 0.4     |
| Proportion Medicaid                                  | -0.002                                                          | -0.442                   | 0.437                    | 0.992   |
| <b>Quality Indicators</b>                            |                                                                 |                          |                          |         |
| Cesarean delivery rate                               | -0.097                                                          | -2.407                   | 2.212                    | 0.934   |
| Vaginal birth after cesarean rate<br>(uncomplicated) | 0.415                                                           | -0.528                   | 1.357                    | 0.386   |
| Primary cesarean delivery rate                       | 0.208                                                           | -2.32                    | 2.737                    | 0.871   |
| <b>MARKET-LEVEL CHARACTERISTICS</b>                  |                                                                 |                          |                          |         |
| <b>Wage Index</b>                                    |                                                                 |                          |                          |         |
| Low                                                  | Reference                                                       |                          |                          |         |
| Medium                                               | 0.202                                                           | 0.0276                   | 0.376                    | 0.023   |
| High                                                 | 0.409                                                           | 0.271                    | 0.547                    | 0       |
| <b>Herfindahl-Hirschman Index (System-wide)</b>      |                                                                 |                          |                          |         |
| Low                                                  | Reference                                                       |                          |                          |         |
| Medium                                               | 0.012                                                           | -0.116                   | 0.139                    | 0.857   |
| High                                                 | 0.005                                                           | -0.14                    | 0.149                    | 0.951   |
| <b>% Without Insurance</b>                           | -0.012                                                          | -0.033                   | 0.009                    | 0.259   |
| <b>% Below Poverty Line</b>                          | 0.013                                                           | -0.005                   | 0.032                    | 0.153   |

Table 4. Regression of adjusted charges on hospital and market characteristics for uncomplicated cesarean sections

|                                                      | Multiplicative<br>increase for each unit<br>change in predictor | 95% CI<br>lower<br>bound | 95% CI<br>upper<br>bound | p-value |
|------------------------------------------------------|-----------------------------------------------------------------|--------------------------|--------------------------|---------|
| <b>HOSPITAL-LEVEL CHARACTERISTICS</b>                |                                                                 |                          |                          |         |
| <b>Ownership</b>                                     |                                                                 |                          |                          |         |
| Government                                           | -0.146                                                          | -0.298                   | 0.006                    | 0.06    |
| NFP                                                  | Reference                                                       |                          |                          |         |
| FP                                                   | 0.172                                                           | 0.032                    | 0.312                    | 0.016   |
| <b>Teaching Status</b>                               |                                                                 |                          |                          |         |
| Yes                                                  | 0.062                                                           | -0.187                   | 0.311                    | 0.626   |
| No                                                   | Reference                                                       |                          |                          |         |
| <b>MSA</b>                                           |                                                                 |                          |                          |         |
| Urban                                                | Reference                                                       |                          |                          |         |
| Rural                                                | 0.088                                                           | -0.081                   | 0.257                    | 0.304   |
| <b>Casemix (severity)</b>                            |                                                                 |                          |                          |         |
| Low                                                  | Reference                                                       |                          |                          |         |
| Medium                                               | 0.087                                                           | -0.052                   | 0.225                    | 0.218   |
| High                                                 | 0.123                                                           | -0.019                   | 0.265                    | 0.088   |
| <b>Capacity</b>                                      |                                                                 |                          |                          |         |
| Licensed beds                                        | -0.0002                                                         | -0.0006                  | 0.0002                   | 0.363   |
| <b>Payer Mix</b>                                     |                                                                 |                          |                          |         |
| Proportion Medicare                                  | 0.491                                                           | -0.004                   | 0.986                    | 0.052   |
| Proportion Medicaid                                  | 0.112                                                           | -0.354                   | 0.578                    | 0.636   |
| <b>Quality Indicators</b>                            |                                                                 |                          |                          |         |
| Cesarean delivery rate                               | 0.491                                                           | -1.659                   | 2.642                    | 0.653   |
| Vaginal birth after cesarean rate<br>(uncomplicated) | 0.508                                                           | -0.315                   | 1.332                    | 0.225   |
| Primary cesarean delivery rate                       | -1.192                                                          | -2.65                    | 2.262                    | 0.877   |
| <b>MARKET-LEVEL CHARACTERISTICS</b>                  |                                                                 |                          |                          |         |
| <b>Wage Index</b>                                    |                                                                 |                          |                          |         |
| Low                                                  | Reference                                                       |                          |                          |         |
| Medium                                               | 0.258                                                           | 0.067                    | 0.449                    | 0.008   |
| High                                                 | 0.378                                                           | 0.26                     | 0.497                    | 0       |
| <b>Herfindahl-Hirschman Index (System-wide)</b>      |                                                                 |                          |                          |         |
| Low                                                  | Reference                                                       |                          |                          |         |
| Medium                                               | -0.079                                                          | -0.196                   | 0.037                    | 0.183   |
| High                                                 | 0.012                                                           | -0.116                   | 0.14                     | 0.855   |
| <b>% Without Insurance</b>                           | -0.0003                                                         | -0.02                    | 0.019                    | 0.025   |
| <b>% Below Poverty Line</b>                          | -0.002                                                          | -0.019                   | 0.015                    | 0.813   |

**Figure Titles & Legends:**

Figure 1. Sample Selection

(no legend)

Figure 2. Adjusted charges and discount prices for uncomplicated vaginal deliveries across California hospitals, 2011

(no legend)

For peer review only

1  
2  
3  
4  
5  
6  
7  
8  
9  
10  
11  
12  
13  
14  
15  
16  
17  
18  
19  
20  
21  
22  
23  
24  
25  
26  
27  
28  
29  
30  
31  
32  
33  
34  
35  
36  
37  
38  
39  
40  
41  
42  
43  
44  
45  
46  
47  
48  
49  
50  
51  
52  
53  
54  
55  
56  
57  
58  
59  
60

# Uncomplicated Vaginal Birth (MS-DRG 755)

# Uncomplicated Cesarean Section (MS-DRG 766)

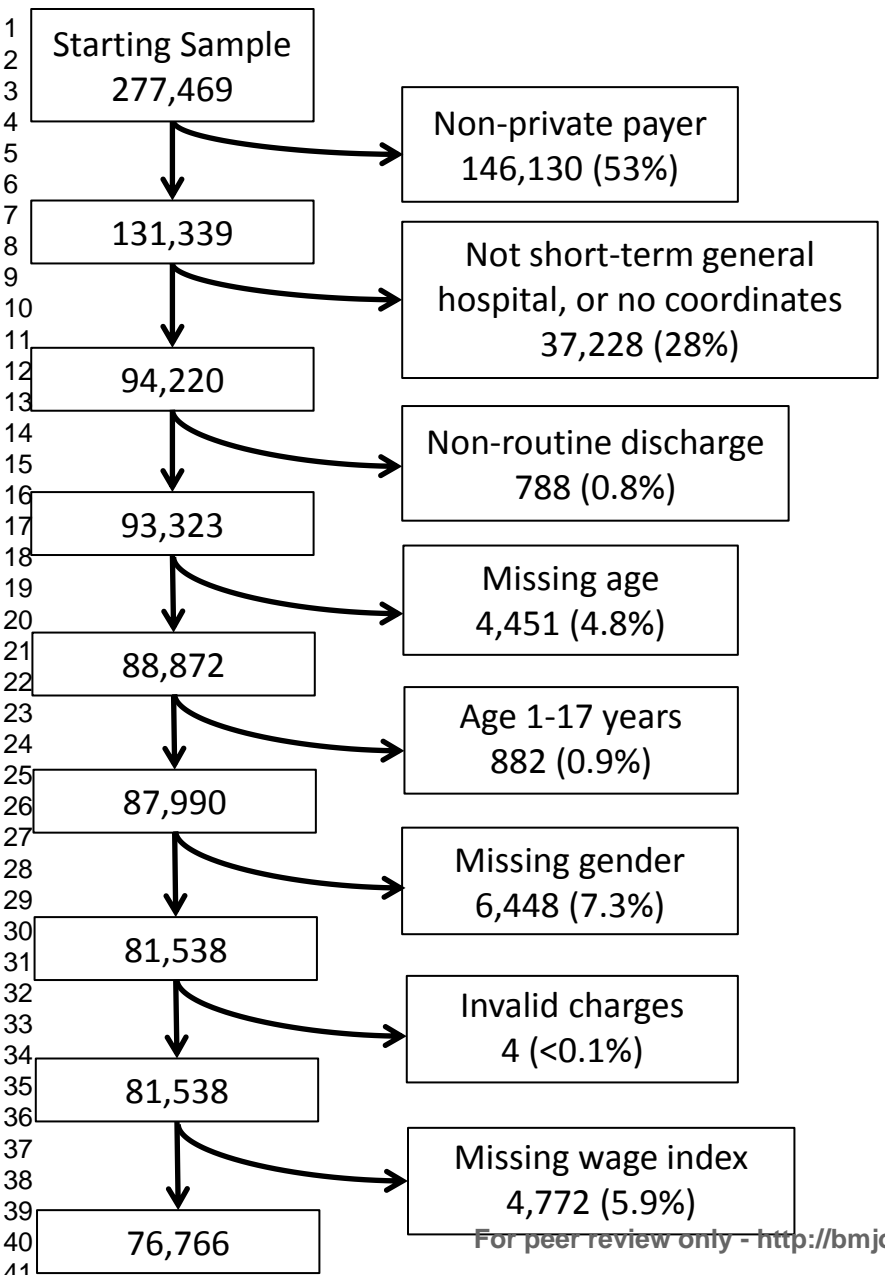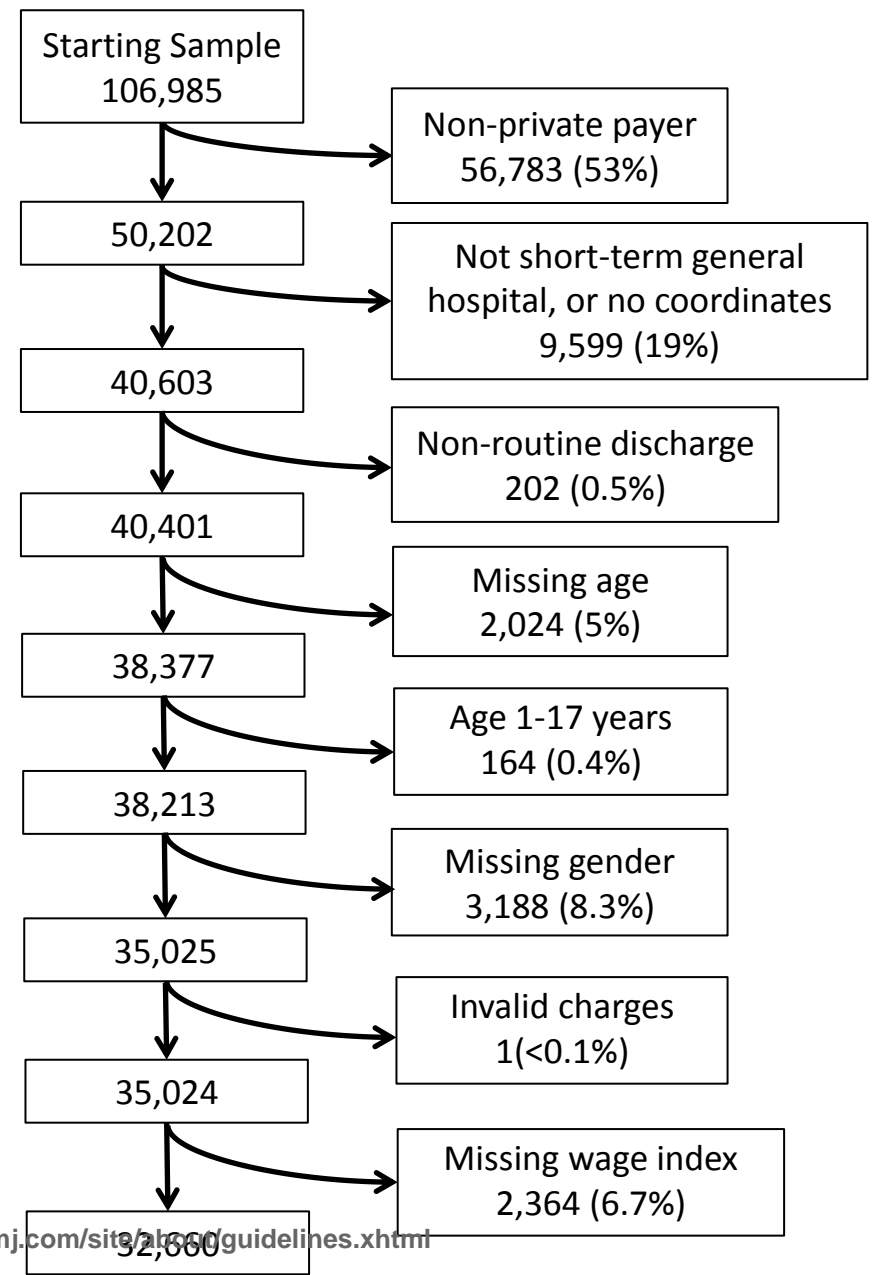

1  
2  
3  
4  
5  
6  
7  
8  
9  
10  
11  
12  
13  
14  
15  
16  
17  
18  
19  
20  
21  
22  
23  
24  
25  
26  
27  
28  
29  
30  
31  
32  
33  
34  
35  
36  
37  
38  
39  
40  
41  
42  
43  
44  
45  
46  
47  
48  
49

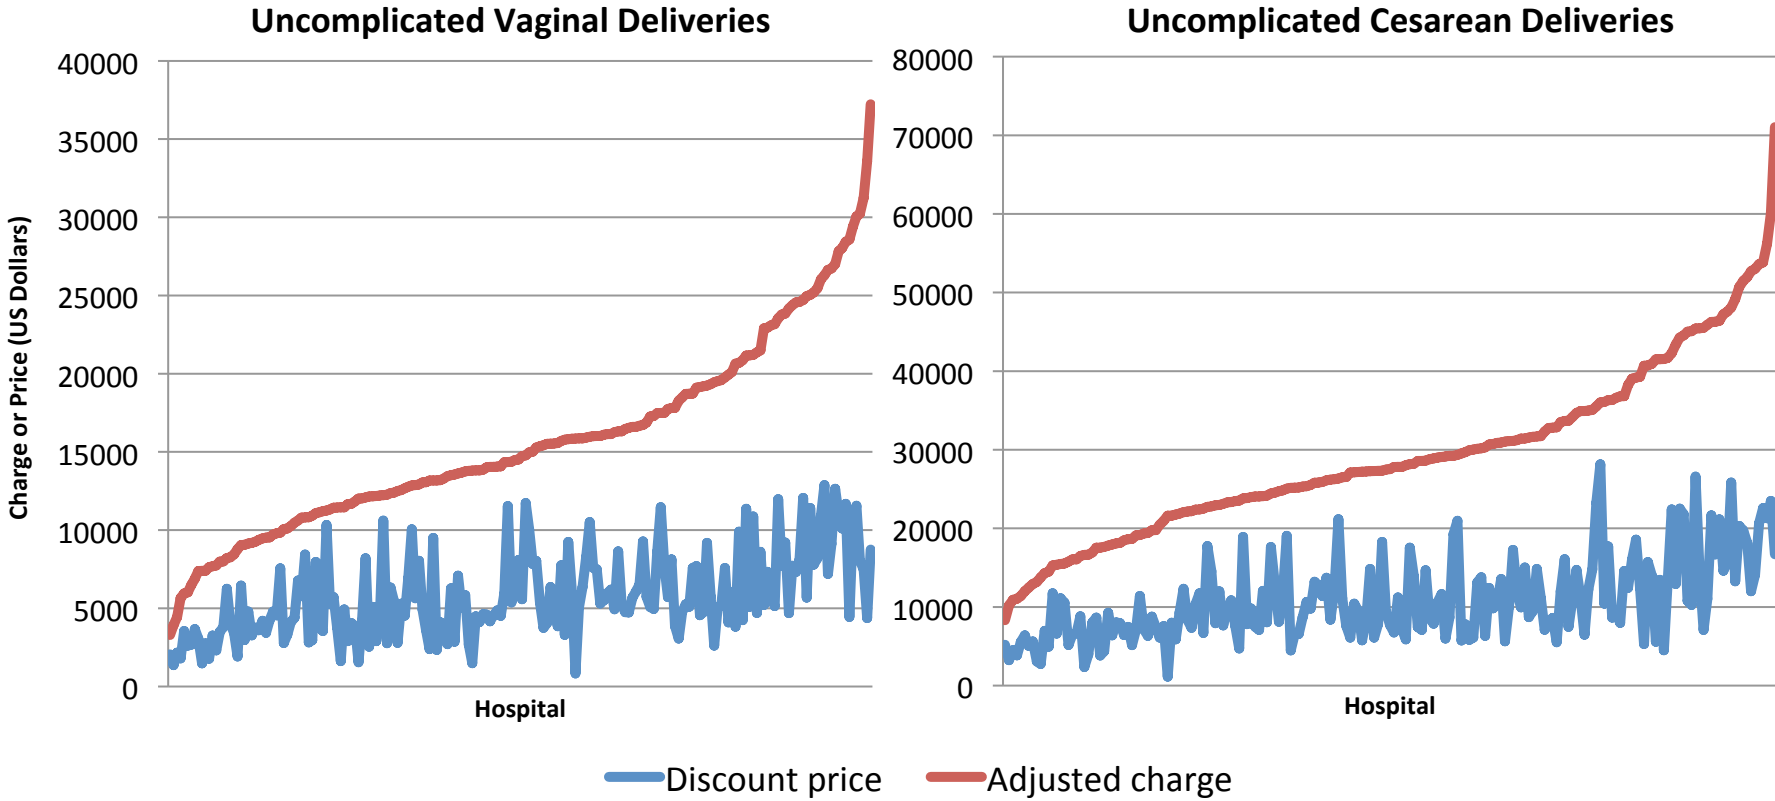



STROBE 2007 (v4) Statement—Checklist of items that should be included in reports of *cross-sectional studies*

| Section/Topic                | Item # | Recommendation                                                                                                                                                                       | Reported on page # |
|------------------------------|--------|--------------------------------------------------------------------------------------------------------------------------------------------------------------------------------------|--------------------|
| Title and abstract           | 1      | (a) Indicate the study's design with a commonly used term in the title or the abstract                                                                                               | 1                  |
|                              |        | (b) Provide in the abstract an informative and balanced summary of what was done and what was found                                                                                  | 2                  |
| <b>Introduction</b>          |        |                                                                                                                                                                                      |                    |
| Background/rationale         | 2      | Explain the scientific background and rationale for the investigation being reported                                                                                                 | 5&6                |
| Objectives                   | 3      | State specific objectives, including any prespecified hypotheses                                                                                                                     | 6                  |
| <b>Methods</b>               |        |                                                                                                                                                                                      |                    |
| Study design                 | 4      | Present key elements of study design early in the paper                                                                                                                              | 6-7                |
| Setting                      | 5      | Describe the setting, locations, and relevant dates, including periods of recruitment, exposure, follow-up, and data collection                                                      | 6-7                |
| Participants                 | 6      | (a) Give the eligibility criteria, and the sources and methods of selection of participants                                                                                          | 7                  |
| Variables                    | 7      | Clearly define all outcomes, exposures, predictors, potential confounders, and effect modifiers. Give diagnostic criteria, if applicable                                             | 8-9                |
| Data sources/<br>measurement | 8*     | For each variable of interest, give sources of data and details of methods of assessment (measurement). Describe comparability of assessment methods if there is more than one group | 9                  |
| Bias                         | 9      | Describe any efforts to address potential sources of bias                                                                                                                            | 8-9                |
| Study size                   | 10     | Explain how the study size was arrived at                                                                                                                                            | 6-7                |
| Quantitative variables       | 11     | Explain how quantitative variables were handled in the analyses. If applicable, describe which groupings were chosen and why                                                         | 8-9                |
| Statistical methods          | 12     | (a) Describe all statistical methods, including those used to control for confounding                                                                                                | 8-9                |
|                              |        | (b) Describe any methods used to examine subgroups and interactions                                                                                                                  | NA                 |
|                              |        | (c) Explain how missing data were addressed                                                                                                                                          | 7-8                |
|                              |        | (d) If applicable, describe analytical methods taking account of sampling strategy                                                                                                   | NA                 |
|                              |        | (e) Describe any sensitivity analyses                                                                                                                                                | NA                 |
| <b>Results</b>               |        |                                                                                                                                                                                      |                    |

|                          |     |                                                                                                                                                                                                              |                                        |
|--------------------------|-----|--------------------------------------------------------------------------------------------------------------------------------------------------------------------------------------------------------------|----------------------------------------|
| Participants             | 13* | (a) Report numbers of individuals at each stage of study—eg numbers potentially eligible, examined for eligibility, confirmed eligible, included in the study, completing follow-up, and analysed            | 10, Figure 1                           |
|                          |     | (b) Give reasons for non-participation at each stage                                                                                                                                                         | NA                                     |
|                          |     | (c) Consider use of a flow diagram                                                                                                                                                                           | Figure 1                               |
| Descriptive data         | 14* | (a) Give characteristics of study participants (eg demographic, clinical, social) and information on exposures and potential confounders                                                                     | 10                                     |
|                          |     | (b) Indicate number of participants with missing data for each variable of interest                                                                                                                          | Figure 1 (excluded – no other missing) |
| Outcome data             | 15* | Report numbers of outcome events or summary measures                                                                                                                                                         | 10-11                                  |
| Main results             | 16  | (a) Give unadjusted estimates and, if applicable, confounder-adjusted estimates and their precision (eg, 95% confidence interval). Make clear which confounders were adjusted for and why they were included | 11-12                                  |
|                          |     | (b) Report category boundaries when continuous variables were categorized                                                                                                                                    | 23-28                                  |
|                          |     | (c) If relevant, consider translating estimates of relative risk into absolute risk for a meaningful time period                                                                                             | NA                                     |
| Other analyses           | 17  | Report other analyses done—eg analyses of subgroups and interactions, and sensitivity analyses                                                                                                               | NA                                     |
| <b>Discussion</b>        |     |                                                                                                                                                                                                              |                                        |
| Key results              | 18  | Summarise key results with reference to study objectives                                                                                                                                                     | 12-13                                  |
| Limitations              | 19  | Discuss limitations of the study, taking into account sources of potential bias or imprecision. Discuss both direction and magnitude of any potential bias                                                   | 15-16                                  |
| Interpretation           | 20  | Give a cautious overall interpretation of results considering objectives, limitations, multiplicity of analyses, results from similar studies, and other relevant evidence                                   | 13-14                                  |
| Generalisability         | 21  | Discuss the generalisability (external validity) of the study results                                                                                                                                        | 16                                     |
| <b>Other information</b> |     |                                                                                                                                                                                                              |                                        |
| Funding                  | 22  | Give the source of funding and the role of the funders for the present study and, if applicable, for the original study on which the present article is based                                                | 4                                      |

\*Give information separately for cases and controls in case-control studies and, if applicable, for exposed and unexposed groups in cohort and cross-sectional studies.

**Note:** An Explanation and Elaboration article discusses each checklist item and gives methodological background and published examples of transparent reporting. The STROBE checklist is best used in conjunction with this article (freely available on the Web sites of PLoS Medicine at <http://www.plosmedicine.org/>, Annals of Internal Medicine at <http://www.annals.org/>, and Epidemiology at <http://www.epidem.com/>). Information on the STROBE Initiative is available at [www.strobe-statement.org](http://www.strobe-statement.org).



**Analysis of Variation in Charges and Prices Paid for Vaginal and Cesarean Section Births: A Cross-Sectional Study**

|                                 |                                                                                                                                                                                                            |
|---------------------------------|------------------------------------------------------------------------------------------------------------------------------------------------------------------------------------------------------------|
| Journal:                        | <i>BMJ Open</i>                                                                                                                                                                                            |
| Manuscript ID:                  | bmjopen-2013-004017.R1                                                                                                                                                                                     |
| Article Type:                   | Research                                                                                                                                                                                                   |
| Date Submitted by the Author:   | 17-Nov-2013                                                                                                                                                                                                |
| Complete List of Authors:       | Hsia, Renee; UCSF, Emergency Medicine<br>Akosa Antwi, Yaa; Indiana University Purdue University – Indianapolis,<br>Department of Economics<br>Weber, Ellerie; University of Texas School of Public Health, |
| <b>Primary Subject Heading</b>: | Health services research                                                                                                                                                                                   |
| Secondary Subject Heading:      | Obstetrics and gynaecology                                                                                                                                                                                 |
| Keywords:                       | HEALTH SERVICES ADMINISTRATION & MANAGEMENT, OBSTETRICS,<br>Health economics < HEALTH SERVICES ADMINISTRATION & MANAGEMENT                                                                                 |
|                                 |                                                                                                                                                                                                            |

SCHOLARONE™  
Manuscripts

Peer Review Only

1  
2  
3 **Analysis of Variation in Charges and Prices Paid for Vaginal and Cesarean Section Births:**  
4  
5  
6 **A Cross-Sectional Study**  
7

8 Renee Y. Hsia, Yaa Akosa Antwi, Ellerie Weber  
9

10  
11  
12 Word Count: 3,886  
13

14  
15  
16 Author affiliations:  
17

18 Renee Y. Hsia, MD, MSc (corresponding author)  
19 Department of Emergency Medicine  
20 University of California, San Francisco  
21 1001 Potrero Ave, 1E21, San Francisco General Hospital  
22 San Francisco, CA 94110  
23 Tel: (415) 206-4612  
24 Fax: (415) 206-5818  
25 Renee.hsia@emergency.ucsf.edu  
26

27  
28 Yaa Akosa Antwi, PhD  
29 Department of Economics  
30 Indiana University Purdue University – Indianapolis  
31 425 University Boulevard, Cavanaugh Hall, Room 516□  
32 Indianapolis, IN 46202  
33 yakosaan@iupui.edu  
34  
35

36  
37 Ellerie Weber, PhD  
38 University of Texas School of Public Health  
39 1200 Pressler St, RAS –W306 □  
40 Houston, TX 77030  
41 elleries@uth.tmc.edu  
42  
43  
44

45 Keywords: hospital charges, obstetrics, cesarean section, health services research  
46  
47  
48  
49  
50  
51  
52  
53  
54  
55  
56  
57  
58  
59  
60

## Abstract

*Objective:* To examine the between-hospital variation of charges and discounted prices for uncomplicated vaginal and cesarean section deliveries, and determine the institutional and market-level characteristics that influence adjusted charges.

*Design, Setting, and Participants:* Using data from the California Office of Statewide Health Planning and Development (OSHPD), we conducted a cross-sectional study of all privately insured patients admitted to California hospitals in 2011 for uncomplicated vaginal delivery (DRG 775) or uncomplicated cesarean section (DRG 766).

*Outcome Measures:* Hospital charges and discounted prices adjusted for each patient's clinical and demographic characteristics.

*Results:* We analyzed 76,766 vaginal deliveries and 32,660 cesarean sections in California in 2011. After adjusting for patient demographic and clinical characteristics, we found that the average California woman could be charged as little as \$3,296 or as much as \$37,227 for a vaginal delivery, and \$8,312 - \$70,908 for a cesarean section depending on which hospital she was admitted to. The discounted prices were, on average, 37% of the charges. We found that hospitals in markets with middling competition had significantly lower adjusted charges for vaginal deliveries, while hospitals with higher wage indices and case mixes, as well as for-profit hospitals, had higher adjusted charges. Hospitals in markets with higher uninsurance rates charged significantly less for cesarean sections, while for-profit hospitals and hospitals with higher wage indices charged more. However, the institutional and market level factors included in our models explained only 35-36% of the between-hospital variation in charges.

*Conclusions:* These results indicate that charges and discounted prices for two common, relatively homogeneous diagnosis groups – uncomplicated vaginal delivery and cesarean section – vary widely between hospitals and are not well explained by observable patient or hospital characteristics.

## Article Summary

### *Article focus:*

- Wide variation in both hospital charges and payment rates has been documented by past studies. However, few studies attempt to explain such variation for episodes of care.
- We aimed to (1) document the variation in charges and discounted prices between California hospitals for the same, average woman's hospital stay for a vaginal birth or cesarean section, and (2) analyze whether hospital or market characteristics could explain that between-hospital variation in charges.

### *Key messages:*

- After adjusting for patient clinical and demographic characteristics, charges for the average California mother's uncomplicated vaginal birth ranged from \$3,296 to \$37,227 depending on which of the 198 hospitals she visited; adjusted charges for cesarean sections ranged from \$8,312 to \$70,908.
- Discounted prices were 37% of charges, on average (range: 5% - 92%)
- For-profit hospitals, hospitals in areas with high costs of living, and hospitals with more severe case-mixes charged more than their counterparts; however, only 35-36% of charges were explained by the observable hospital and market characteristics in our models.

### *Strengths and limitations of this study:*

- Uses a comprehensive dataset of all visits to California hospitals and links to patient and institutional characteristics, allowing for isolation of between-hospital variation and analysis over a complete population.
- Limitations include use of aggregate discount rates to estimate discounted prices paid, potential residual patient-level variation in care intensity, and inability to completely capture hospital quality.

## BACKGROUND

United States healthcare expenditures totaled \$2.7 trillion dollars in 2011 - 17.7% of US GDP – and are projected to rise steeply in future years.<sup>1</sup> Unlike most other industries, the way healthcare is priced and paid for is notoriously opaque, making it difficult for patients to act as educated, price-comparing consumers.<sup>2</sup> At a time when out of pocket payments for healthcare are increasing,<sup>3</sup> and growing numbers of “consumer directed” high deductible health plans put more pressure on patients to make cost-efficient healthcare decisions,<sup>4,5</sup> the opacity of healthcare pricing is increasingly concerning.

Recently, hospital charges have come to the forefront of political, popular, and medical discourse due to their inexplicable magnitude and devastating effects on specific patients.<sup>6-8</sup> While insurers typically negotiate lower reimbursements, these full, inflated charges are still billed to the 22% of American adults aged 19-64 who are uninsured and to privately insured patients receiving care out of network,<sup>9,10</sup> contributing in large part to the 57% of US bankruptcies that result from medical bills.<sup>11</sup> Further, charges indirectly affect healthcare pricing for all patients. Many private insurers use charges as the basis of price negotiations;<sup>7,12,13</sup> Medicare uses charges in determining inpatient diagnosis group weighting and outlier payments,<sup>14-17</sup> and also must adapt their prices to private-sector prices.<sup>18</sup> In addition, hospitals use charges in calculations of uncompensated care, which affect their non-profit status and thus many aspects of their business model, participating insurance plans, and prices.<sup>19,20</sup>

Yet despite their consistent use in many forms of healthcare price setting and hospital bills, charges appear to be nearly random, and are either based on outdated, historical methods or set using idiosyncratic, proprietary formulas.<sup>12,13,21</sup> One hospital administrator called his hospital’s

1  
2  
3 method of setting charges “madness.”<sup>22</sup> The academic literature has supported this assumption;  
4  
5 studies have documented the wide variation in hospital and physician charges and payment rates  
6  
7 for the average inpatient stay.<sup>23</sup> Past economics literature has attempted to discern some method  
8  
9 to charge setting by documenting the relationship between hospital payment rates and industry  
10  
11 organization, and has found for example that less competitive markets have higher predicted  
12  
13 prices.<sup>24 25</sup> These studies, however, have mostly addressed broad price indices based on aggregate  
14  
15 hospital charges.  
16  
17  
18  
19

20         Given the wide range of procedures and diagnoses that comprise hospitals’ inpatient  
21  
22 censuses, it is important to evaluate specific, common episodes of care that should have less  
23  
24 variation in charges, and are more relevant to patients presenting with a complaint and no  
25  
26 knowledge of the specific services they will need. An ideal service is childbirth, the most  
27  
28 common reason for hospitalizations in the US,<sup>26</sup> accounting for 4.2 million inpatient stays and  
29  
30 \$16.1 billion in hospital costs in 2008.<sup>27</sup> Recently, a study by Truven Health Analytics looked at  
31  
32 both charges and discounted prices nationally for vaginal and cesarean childbirth using their own  
33  
34 proprietary database of paid medical claims, finding significant variation in both charges and  
35  
36 reimbursements.<sup>28</sup> However, the study does not address the possible sources of the variation in  
37  
38 charges that it documents.  
39  
40  
41  
42

43         In this study, we sought to fill this gap by documenting and attempting to explain  
44  
45 between-hospital variation in charges for the same, average woman’s inpatient stay for vaginal  
46  
47 birth or cesarean section in California – relatively homogeneous episodes of care. Our analysis is  
48  
49 based on the theory that the variation in charges for these homogeneous episodes of care, once  
50  
51 adjusted for patient characteristics, is potentially explained by measurable hospital and market  
52  
53 characteristics that govern hospital charge-setting behavior. We first predict charges and  
54  
55  
56  
57  
58  
59  
60



1  
2  
3  
4  
5  
6  
7  
8  
9  
10  
11  
12  
13  
14  
15  
16  
17  
18  
19  
20  
21  
22  
23  
24  
25  
26  
27  
28  
29  
30  
31  
32  
33  
34  
35  
36  
37  
38  
39  
40  
41  
42  
43  
44  
45  
46  
47  
48  
49  
50  
51  
52  
53  
54  
55  
56  
57  
58  
59  
60

estimated prices paid at each hospital after adjusting for patient characteristics, and then explore whether hospital or market-level characteristics can explain some of this charge variation.

## METHODS

### Data Source

We used the 2011 California Office of Statewide Health Planning and Development (OSHPD) public Patient Discharge Public Data Set (PDD) to perform our cross-sectional analysis. The OSHPD PDD captures patient demographic and clinical information, along with charges, for each inpatient encounter at California hospitals. Our study was exempt from review by the Committee on Human Research at the University of California, San Francisco because we used a public data source that was masked for identifiers.<sup>1</sup>

To capture hospital-level characteristics, we used OSHPD's hospital financial and utilization files for 2011. We also used the 2009 Area Resources File,<sup>29</sup> the most currently available year, to obtain county-level area percent of uninsurance and poverty, and the Impact Files from the Centers for Medicare & Medicaid Services (CMS), to obtain a hospital wage index.<sup>30</sup>

### Sample Selection

We limited our study to adult women ( $\geq 18$  years old) who were admitted for diagnosis-related group (DRG) 775 (uncomplicated vaginal delivery) or 766 (uncomplicated cesarean section) at short-term general California hospitals. We also only included privately insured

---

<sup>1</sup> OSHPD masks selective patient information in this public dataset to prevent identification of individuals pursuant to the California Health Data and Advisory Council Consolidation Act, Health and Safety Code section 128675 et seq.

1  
2  
3 women (47.5% of DRG 775; 47.1% of DRG 766), as our estimated discount rate only applies to  
4  
5 them. Patients admitted to federal hospitals (e.g. Veterans Administration hospitals) are not in  
6  
7 our data as OSHPD reporting requirements do not apply to such hospitals. Also, privately insured  
8  
9 women who receive care through the Kaiser Permanente network were excluded, as Kaiser  
10  
11 hospitals do not report charges to the state (29.4% of DRG 775; 19.7% of DRG 766).  
12  
13

14  
15 To restrict our sample to a relatively healthy and more homogenous population, we  
16  
17 excluded patients who died in the hospital or who did not have a routine discharge. We further  
18  
19 excluded patients without a valid age group or gender recorded, as we could not accurately adjust  
20  
21 for their demographic predictors of charge. We also excluded patients with invalid charges, those  
22  
23 receiving charitable care, and those with charges too large to fit within the charge variable's  
24  
25 character limit. Finally, we excluded patients visiting hospitals that did not report a wage index.  
26  
27 See Figure 1 for a full description of the applied exclusions.  
28  
29  
30  
31  
32  
33

### 34 Outcome

35  
36 Our first outcome was hospital charges, which are the total dollar amounts billed by the  
37  
38 hospital for each admission, excluding physician fees. These charges reflect the hospital's full,  
39  
40 established rates before contractual adjustments and prepayments.  
41  
42

43  
44 Our secondary outcome was estimated discounted prices, or the amounts which hospitals  
45  
46 received from private insurers for the services their enrollees received. We obtained this by  
47  
48 multiplying the total charge billed to the patient with the hospital's discount rate for privately  
49  
50 insured patients. As done in previous literature, the discount rate for privately insured patients at  
51  
52 each hospital was calculated using the formula: (gross inpatient revenue + gross outpatient  
53  
54  
55  
56  
57  
58  
59  
60

1  
2  
3 revenue - contractual adjustments)/(gross inpatient revenue + gross outpatient revenue).<sup>24 31</sup> We  
4  
5 obtained these amounts through the 2011 OSHPD financial files for each hospital.  
6  
7  
8  
9

## 10 **Statistical analysis**

11  
12 Our analysis is similar to the two-stage approach used by previous economic analyses.<sup>24 32</sup>  
13  
14 The approach first separates out patient-level charge variation within each hospital and estimates  
15  
16 childbirth charges for the average California woman at each hospital, and then looks at the  
17  
18 independent influence of the hospital and market characteristics on variation in those estimated  
19  
20 charges across hospitals. Estimates from this two-stage approach can be mapped to estimates  
21  
22 from hierarchical models, in the sense that they allow for random effects in the intercept  
23  
24 coefficient. However, for our purposes, the two-stage model is preferable because we are  
25  
26 interested in explaining variation in *expected* charges using observable hospital characteristics.  
27  
28 For all analyses, charges are logged to account for the right skew. We performed separate analysis  
29  
30 for each DRG.  
31  
32  
33  
34  
35

36  
37 In the first stage, to control for patient-level variation in charges, we regressed logged raw  
38  
39 charges on patient characteristics shown in previous literature to be correlated with charges for the  
40  
41 price indices and line item charges.<sup>33 34</sup> Patient characteristics included age (in two categories: 18-  
42  
43 34, and  $\geq 35$ ), number of conditions present on admission, Charlson comorbidities, and length of  
44  
45 stay. We chose the 18-34 and  $\geq 35$  maternal age groups because 35 years old is the cutoff at  
46  
47 which the American Congress of Obstetricians and Gynecologists generally defines “advanced  
48  
49 maternal age,” which has been associated with increased risk of complications for both the mother  
50  
51 and the infant.<sup>35-37</sup> Because length of stay is also often right-skewed, we transformed it to log  
52  
53 (length of stay + 1). We included three different types of private insurance, including two forms  
54  
55  
56  
57  
58  
59  
60

1  
2  
3 of managed care (Knox-Keene/Medi-Cal County Organized Health System, or other), and  
4  
5 traditional private coverage. To control for unobservable within-hospital factors that could affect  
6  
7 variation, we also included a dummy variable for each hospital. Errors from this regression are  
8  
9 clustered at the hospital level. Results of these regressions are shown in Supplementary Tables 1  
10  
11 & 2.  
12

13  
14  
15 From this regression, we then calculated a given hospital's adjusted charge for the average  
16  
17 statewide patient for that DRG, where the adjusted charges represented standardized log  
18  
19 charge/(day + 1). This gave us a single adjusted charge per day for each hospital, representing the  
20  
21 predicted charge for a patient with the same, average clinical and demographic characteristics,  
22  
23 which we then used as the dependent variable in our second-stage regression.  
24  
25

26  
27 In the second stage, we regressed our adjusted logged charges on hospital and market level  
28  
29 factors cited by previous literature as related to broad price indices,<sup>24 32 38</sup> to determine which  
30  
31 characteristics explain observed between-hospital variation in charges for childbirth. Hospital-  
32  
33 level factors included ownership (not-for-profit, for-profit, government), teaching status,  
34  
35 urban/rural location, capacity (number of licensed beds), patient payer mix (proportion Medicare,  
36  
37 Medicaid), and case-mix (which was used to adjust the average cost per patient for a given  
38  
39 hospital relative to the adjusted average cost for other hospitals).<sup>39</sup> We also incorporated three  
40  
41 quality measures from the Agency for Healthcare Research Quality's Inpatient Quality Indicators  
42  
43 (IQIs): cesarean delivery rate, vaginal birth after cesarean rate (uncomplicated), and primary  
44  
45 caesarian delivery rate.<sup>40</sup> These utilization indicators are intended to capture either over-use of  
46  
47 procedures found to be unnecessary or low quality, or under-use of procedures with merit, such as  
48  
49 vaginal birth after prior cesarean delivery.<sup>41</sup> We further incorporated market-level factors  
50  
51  
52  
53  
54  
55  
56  
57  
58  
59  
60

1  
2  
3 including the wage index, percent uninsured in the county, percent below the poverty line in the  
4  
5 county, as well as the system-wide Herfindahl-Hirschman Index (HHI).  
6  
7

8 The HHI is a widely used economic measure of the degree of competition faced by a  
9  
10 company, or in this case hospital, within its market.<sup>42</sup> It is calculated as the sum of the squares of  
11  
12 market shares for each hospital in a given market. Higher HHIs are associated with less  
13  
14 competition, while lower HHIs indicate more competitive markets. We calculated these shares of  
15  
16 patients directly from the hospital discharge data. Our HHI calculation also accounts for  
17  
18 membership in a hospital system, which has been shown to influence hospital price setting.<sup>38</sup>  
19  
20  
21  
22  
23

## 24 RESULTS

### 25 Sample

26  
27 We analyzed a sample of 76,766 uncomplicated vaginal deliveries, and 32,660  
28  
29 uncomplicated cesarean sections in 2011 across 198 and 195 California hospitals, respectively. As  
30  
31 shown in Table 1, 78.4% of women with uncomplicated vaginal deliveries were between the ages  
32  
33 of 18-34, and 97.9% had a Charlson comorbidity index of 0, indicating that they were relatively  
34  
35 healthy. The length of stay for 77.8% of these women was less than 3 days. For the 32,660  
36  
37 women with uncomplicated cesarean sections (Table 2), the majority (69.5%) were again between  
38  
39 ages 18-34, almost all (97.2%) had a Charlson comorbidity index of 0, and 77.5% had a hospital  
40  
41 stay between 3 to 6 days. For both DRGs, the majority of hospitals were not-for-profit, non-  
42  
43 teaching hospitals located in urban areas.  
44  
45  
46  
47  
48  
49  
50  
51  
52

### 53 Charges

1  
2  
3 We found that the raw charges for uncomplicated vaginal birth ranged from \$3,344 to  
4 \$43,715, with a median charge of \$15,278 (IQR \$7,981). Once adjusted for patient clinical and  
5 demographic characteristics, charges for the average patient ranged from \$3,296 to \$37,227,  
6 depending on which of the 198 hospitals she visited (median \$14,620; IQR \$7,643). For  
7 uncomplicated cesarean sections, the raw charges ranged from \$7,905 to \$72,569, with a median  
8 charge of \$27,517 (IQR \$14,206). Adjusted charges ranged from \$8,312 to \$70,908 with a  
9 median charge of \$27,481 (IQR \$12,525), again for a patient with the same average  
10 characteristics.  
11  
12  
13  
14  
15  
16  
17  
18  
19  
20  
21  
22  
23  
24

### 25 **Estimated discounted price**

26  
27 Discounted prices paid by private insurers ranged from 5% to 92% of the charge, with an  
28 average of 37%. Discounted prices for vaginal deliveries ranged from \$835 to \$12,873 (median  
29 \$5,123; IQR \$3,827), and prices for cesarean sections varied from \$1,135 to \$28,105 (median  
30 \$9,640; IQR \$6,631). For vaginal births, the largest difference between a hospital's adjusted  
31 charge and estimated discount price was \$29,217, where it charged \$33,593 for an average patient,  
32 almost eight times the \$4,376 it finally received from insurers. The smallest difference was just  
33 \$920, where the hospital's average charge (\$11,251) was a mere 109% higher than its estimated  
34 price (\$10,332). For uncomplicated cesarean sections, the differences were even more dramatic –  
35 one hospital charged 1899% of what it typically received, while another charged 124%. Figure 2  
36 illustrates the differences between the adjusted charges and discounted prices for each hospital in  
37 our dataset for the two conditions.  
38  
39  
40  
41  
42  
43  
44  
45  
46  
47  
48  
49  
50  
51  
52  
53  
54

### 55 **Hospital and market-level factors**

56  
57  
58  
59  
60

1  
2  
3  
4 In the multivariate model using adjusted charges across hospitals as the dependent  
5 variable, for uncomplicated vaginal delivery, hospitals with for-profit ownership, severe case-  
6 mixes, and high wage indices charged significantly more than their counterparts (Table 3).  
7  
8  
9

10 For uncomplicated cesarean section (Table 4), again charge was associated with  
11 ownership. Government-owned hospitals had 14.6% lower charges (95% CI -29.8, 0.6), while  
12 for-profit hospitals had 17.2% higher charges (95% CI 3.2, 31.2) than non-profit hospitals. This  
13 implies that if the mean charge for uncomplicated cesarean section, \$29,480, was offered at a non-  
14 profit hospital, the adjusted charge in a government hospital would be \$25,176 and the adjusted  
15 charge in a for-profit hospital would be \$34,551. Also similar to our findings with uncomplicated  
16 vaginal births, hospitals with higher labor costs (wage index) had higher charges. The case-mix  
17 was no longer predictive, but a higher rate of percent uninsured in the county was significantly  
18 correlated with lower charges. Though the significance was marginal, the proportion of patients  
19 covered by Medicare was also associated with higher charges.  
20  
21  
22  
23  
24  
25  
26  
27  
28  
29  
30  
31  
32  
33  
34  
35

## 36 DISCUSSION

37  
38 Our results demonstrate the wide variability of charges and prices for childbirth between  
39 hospitals, even after controlling for patient characteristics, and point to specific institutional and  
40 market-level factors that affect those standardized charges. Even after adjusting for patient  
41 demographic and clinical characteristics, we found that charges for vaginal births ranged from  
42 \$3,296 to \$37,227, and charges for cesarean sections ranged from \$8,312 to \$70,908, depending  
43 only on which hospital the average California woman giving birth visited. That implies that, after  
44 adjusting for patient characteristics, the highest hospital charge was more than 11 times that of the  
45 lowest hospital charge for vaginal births, and more than 8.5 times that of the lowest hospital  
46  
47  
48  
49  
50  
51  
52  
53  
54  
55  
56  
57  
58  
59  
60

1  
2  
3 charge for cesarean section births. Without adjusting for patient characteristics, the hospital with  
4  
5 the highest charges would charge about 13 times more than the hospital with the lowest charges  
6  
7 for vaginal births, and about 9 times more than the hospital with the lowest charges for cesarean  
8  
9 sections. While the variation of adjusted charges is, as expected, smaller than the variation in raw  
10  
11 charges between hospitals, the very small difference between the two implies that service-  
12  
13 intensity and patient observable factors provide little explanation for variation in charges between  
14  
15 hospitals.  
16  
17  
18  
19

20 Our findings show that some hospital and market-level factors, on the other hand, do  
21  
22 clearly impact the differences in charges between hospitals. We find a positive relationship  
23  
24 between charges for childbirth and hospital wage index, case-mix index, and for-profit ownership.  
25  
26 However, it is probably more notable how *few* of the hospital and market-level regressors are  
27  
28 significant in explaining the variation. Our vaginal and cesarean delivery models account for only  
29  
30 36% and 35%, respectively, of the variation observed between hospitals in adjusted charges. This  
31  
32 implies that either the variation is a result of (a) unobservable hospital characteristics or (b) pure  
33  
34 noise.  
35  
36  
37  
38

39 Based on findings from the existing literature, we hypothesize that the variation we find is  
40  
41 more likely random than due to unobservable hospital characteristics. A MedPAC study of  
42  
43 hospitals found that many items on chargemasters were based on historical prices, which were  
44  
45 formulated before it was possible to accurately estimate costs.<sup>21</sup> Even today, the survey found that  
46  
47 only a third of hospitals reported any concern regarding covering operating costs when updating  
48  
49 their chargemasters. Rather, most were concerned with conforming to regulations and maintaining  
50  
51 their overall bottom line.<sup>21</sup> Today, even for new services providers are not incentivized to set  
52  
53 charges based on costs, because third party payments are largely not based on true costs for a  
54  
55  
56  
57  
58  
59  
60



1  
2  
3 given service.<sup>12 23</sup> This therefore precludes a valuable correlation between cost and charge and  
4  
5 thus an anchor on which charge variation would be limited.<sup>12</sup> In addition, the current lack of  
6  
7 correlation between cost and charge is exacerbated by simplistic “updates” in the form of across  
8  
9 the board percentage increases of charges, often resulting in certain services subsidizing others to  
10  
11 manage the overall solvency of the hospital or department.<sup>12 21 43</sup> Thus, our results again confirm  
12  
13 the documented lack of comprehensible or at least measurable sense in the chargemaster system.  
14  
15

16  
17 The troubling part of this largely random variation is that charges do still matter to patients  
18  
19 and to hospitals in many ways. The 41.9 million uninsured Americans, along with privately  
20  
21 insured patients visiting an out-of-network hospital may be faced with the full charges for their  
22  
23 care, which are typically so high that few patients can pay them, resulting in need for charity care,  
24  
25 sliding scale payments, or often bad debt on the patient’s part.<sup>13 44</sup> In addition, as some private  
26  
27 insurers still negotiate discounts off charges, especially in fee-for-service systems, and use  
28  
29 charges to benchmark the relative weights in their prospective payment systems, higher charges  
30  
31 can lead to higher out of pocket payments for patients.<sup>3 12 13</sup> Medicare also compares charges  
32  
33 between DRG groups modified by cost-to-charge ratios calculated at the cost center level to  
34  
35 determine the relative weight of DRG’s and identify qualifying outlier payments within DRGs.<sup>14</sup>  
36  
37  
38  
39  
40  
41  
42  
43  
44  
45  
46  
47  
48  
49  
50  
51  
52  
53  
54  
55  
56  
57  
58  
59  
60  
17 Finally, many hospitals use charges to calculate their uncompensated care costs, which affect  
their not-for-profit and hence tax exempt status. In fact, the IRS found that 18-20% of hospitals  
include the difference between charges and allowed payments by private insurers, and 50%  
include the difference between charges and payments received from the uninsured in their  
uncompensated care calculations.<sup>19 20</sup>

53 A secondary finding in this study is the large discrepancy between hospitals’ predicted  
54  
55 charges and their estimated discounts. Our finding that insurers pay on average 37% of charges is  
56  
57  
58  
59  
60

1  
2  
3 supported by previous literature showing that private insurers pay on average 39% of the charge  
4 for hospital inpatient services.<sup>45 46</sup> We estimated median payments of \$5,123 for vaginal and  
5  
6 \$9,640 for cesarean section births, slightly lower than the Truven estimates of \$8,519 and \$12,894,  
7  
8 respectively.<sup>28</sup> The difference between the adjusted charge and discounted price estimates what  
9  
10 could be considered “excess charges”, and in 2011 sums to \$1.36 billion dollars for all  
11  
12 uncomplicated vaginal and cesarean births in California (\$760.1 million for uncomplicated  
13  
14 vaginal deliveries; \$601.1 million for uncomplicated cesarean sections).  
15  
16  
17  
18  
19

20 Past literature has speculated two reasons for high charges relative to reimbursements.  
21  
22 First is the change in Medicare’s reimbursement protocol from the historical cost-plus  
23  
24 reimbursement system to today’s prospective payment system.<sup>43</sup> Because providers were paid a  
25  
26 percentage above the charged rate, it was in the providers’ financial interest to maintain exorbitant  
27  
28 charges, a practice that has persisted despite the change in reimbursement. Second, in fee-for-  
29  
30 service payments for which reimbursements are simple discounts of charges, hospitals are  
31  
32 incentivized to raise their charges in an effort to increase reimbursement. Finally, hospitals may  
33  
34 be setting artificially inflated charges to increase the nominal value of their uncompensated care  
35  
36 indices, which are based on charges.<sup>20 47</sup>  
37  
38  
39  
40  
41  
42  
43

#### 44 **Limitations of Research**

45  
46 There are several limitations of this study. First, we used DRGs to determine what  
47  
48 constituted an episode of care. The MS-DRG system was designed to classify patients into groups  
49  
50 based on likely utilization of services and accumulation of costs. However, because the  
51  
52 administrative data we used does not provide charge itemization, it is very likely that some  
53  
54 women received greater “intensity” of services in unobservable ways. For instance, if one woman  
55  
56  
57  
58  
59  
60

1  
2  
3 received an epidural, and another woman did not, we might expect the woman with the epidural  
4  
5 to have higher charges. As much as possible, we are minimizing fallout from this limitation by  
6  
7 using observable attributes of the episode (e.g. length-of-stay, discharge, comorbidities) in our  
8  
9 first-stage regression, which should absorb some of the patient-level differences in care intensity.  
10  
11 It is possible, however, that if unobservable patient characteristics affecting intensity of care are  
12  
13 correlated with hospital characteristics, we might expect our second stage estimates to be biased.  
14  
15 On the other hand, if treatment intensity is a hospital-level characteristic, then our analysis does  
16  
17 accurately capture this.  
18  
19  
20  
21

22  
23 Second, our brief analysis of discounted prices is limited by the fact that we must estimate  
24  
25 discount rates, since insurers and providers carefully guard their actual payment rates as  
26  
27 proprietary. The financial data we used is self-reported, and thus the accuracy of our estimates is  
28  
29 dependent on the accuracy of hospital reporting to OSHPD. However, inaccuracies are not a big  
30  
31 concern as OSHPD performs systematic financial audits of their data. Further, the discount rates  
32  
33 are hospital-wide and aggregate across all insurers, while negotiations regarding discount rates  
34  
35 granted by a given hospital may vary widely by particular insurer and according to DRG or cost  
36  
37 center. It is partly because of this significant limitation that we chose to focus our main results on  
38  
39 charges and the factors affecting them. That said, our estimated prices were roughly consistent  
40  
41 with the Truven study, which did have access to claims-based prices paid.<sup>28</sup> In addition,  
42  
43 discounted rates negotiated by insurers have been found to be broadly applied to wide swaths of  
44  
45 services, as the main goal of such negotiations is overall solvency.<sup>48</sup> Further, modifications to  
46  
47 charges at the aggregate level are regularly used in institutional practice, such as cost to charge  
48  
49 ratios used by Centers for Medicare and Medicaid Services (CMS) to estimate outlier payments,  
50  
51 which have been shown to be imperfect but generally appropriate estimates of cost.<sup>49</sup>  
52  
53  
54  
55  
56  
57  
58  
59  
60

1  
2  
3  
4  
5  
6  
7  
8  
9  
10  
11  
12  
13  
14  
15  
16  
17  
18  
19  
20  
21  
22  
23  
24  
25  
26  
27  
28  
29  
30  
31  
32  
33  
34  
35  
36  
37  
38  
39  
40  
41  
42  
43  
44  
45  
46  
47  
48  
49  
50  
51  
52  
53  
54  
55  
56  
57  
58  
59  
60

Third, our study only examines charges in California. Though California is a large, diverse state, our results cannot be generalized to the entire nation. Last, our study could not examine the full effect of quality of care on hospital price premiums, though we included select quality indicators. However, it is difficult to imagine that these variations could be attributed entirely to quality, given numerous studies demonstrating that both charges and payments are unrelated to quality, which we similarly found in our analysis of three quality measures.<sup>50 51</sup>

## CONCLUSIONS

For the same average patient in California, we find that charges for uncomplicated vaginal delivery ranged from \$3,296 to \$37,227 (median: \$14,620), and charges for uncomplicated cesarean section ranged from \$8,312 to \$70,908 (median: \$27,481) depending on which hospital she visited. Hospital ownership, case-mix, wage index, percent uninsured in the county, and market competitiveness had a significant impact on these adjusted charges. Estimated discounted prices averaged 37% of the adjusted charges. Our findings indicate that the charge faced by a patient for a common obstetrical procedure is significantly influenced by institutional and market-level factors outside of her own presentation, but that the majority of variation in charges between hospitals she could visit remains unexplained. Our results also suggest significant room for improved methodologies, incentives, and policy interventions for accurately estimating and presenting charges and ultimate costs.

## Acknowledgements

We especially thank Julia Brownell, BA, and Emilio Galan, BS, for their editorial and technical assistance.

## Authors' Contributions

RYH conceived of the study, obtained the data, directed and interpreted the analyses, and helped draft and edit the manuscript. YAA helped conceive the study design, analyzed the data, interpreted the results, and edited the manuscript. EW contributed to methodological design, analyzed the data and interpreted the results, and helped with editing of the manuscript. All authors have read and approved the final manuscript.

## Funding Statement:

This work was supported by the National Center for Advancing Translational Sciences, National Institutes of Health, through UCSF-CTSI Grant Number KL2 TR000143 (R.Y.H), the Robert Wood Johnson Foundation Physician Faculty Scholars Program (R.Y.H.), and a UCSF Center for Healthcare Value grant. The funding sponsors played no part in the design and conduct of the study; collection, management, analysis and interpretation of the data; and preparation, review, or approval of the manuscript. Its contents are solely the responsibility of the authors and do not necessarily represent the official views of any of the funding agencies.

## Competing Interests:

None of the authors have any competing interests to report

## Data Sharing Statement

All datasets used in this study are available to the public through the California Office of Statewide Health Planning and Development (OSHPD), either by download or by request at: <http://oshpd.ca.gov>.

**REFERENCES:**

1. Office of the Actuary. National Health Expenditure Projections 2011-2021: Centers for Medicare and Medicaid Services, 2011.
2. Government Accountability Office (GAO). Meaningful Price Information Is Difficult for Consumers to Obtain Prior to Receiving Care. GAO-11-791; 2011.
3. Truffer CJ, Keehan S, Smith S, et al. Health spending projections through 2019: the recession's impact continues. *Health Aff (Millwood)* 2010;29(3):522-29.
4. The Kaiser Family Foundation, Health Research & Educational Trust. Employer Health Benefits 2012 Annual Survey, 2012.
5. Robinson JC, Ginsburg PB. Consumer-driven health care: promise and performance. *Health Aff (Millwood)* 2009;28(2):w272-81.
6. Brill S. Bitter Pill: Why Medical Bills Are Killing Us. *TIME Magazine* Feb 20, 2013.
7. Selberg J, Marks CM. A Problem Too Big to See: The Sobering Reality of Hospital Pricing: Institute for Healthcare Improvement; 2013.
8. Salam R. Guest Post by Oren Cass: What Steven Brill Gets Wrong on U.S. Health Care Costs. *The National Review Online*. Feb 28, 2013.
9. Anderson GF. From 'Soak The Rich' To 'Soak The Poor': Recent Trends In Hospital Pricing. *Health Aff (Millwood)* 2007;26(3):780-89.
10. DeNavas-Walt C, Proctor B, Smith J. Income, Poverty, and Health Insurance Coverage in the United States: 2011. In: Bureau UC, editor. *Current Population Reports*. Washington, D.C., 2012.
11. Himmelstein DU, Thorne D, Warren E, et al. Medical Bankruptcy in the United States, 2007: Results of a National Study. *Am J Med* 2009;122(8):741-46.
12. Ginsburg PB, Grossman JM. When the price isn't right: how inadvertent payment incentives drive medical care. *Health Aff (Millwood)* 2005;W5.
13. Reinhardt UE. The Pricing Of U.S. Hospital Services: Chaos Behind A Veil Of Secrecy. *Health Aff (Millwood)* 2006;25(1):57-69.
14. Medicare Program; Change in Methodology for Determining Payment for Extraordinarily High-Cost Cases (Cost Outliers) Under the Acute Care Hospital Inpatient and Long-Term Care Hospital Prospective Payment Systems; Final Rule. 68 *Federal Register* 110. (June 9, 2003): 34494-504.
15. Medicare Program; Changes to the Hospital Inpatient Prospective Payment Systems and Fiscal Year 2007 Rates; Fiscal Year 2007 Occupational Mix Adjustment to Wage Index;

- 1  
2  
3 Health Care Infrastructure Improvement Program; Selection Criteria of Loan Program for  
4 Qualifying Hospitals Engaged in Cancer-Related Health Care and Forgiveness of  
5 Indebtedness; and Exclusion of Vendor Purchases Made Under the Competitive  
6 Acquisition Program (CAP) for Outpatient Drugs and Biologicals Under Part B for the  
7 Purpose of Calculating the Average Sales Price (ASP); Final Rules & Interim Final Rule  
8 With Comment Period. *71 Federal Register* 160. (August 18, 2006): 47870 -8351.  
9  
10  
11 16. Medicare Program; Proposed Changes to the Hospital Inpatient Prospective Payment Systems  
12 and Fiscal Year 2009 Rates; Proposed Changes to Disclosure of Physician Ownership in  
13 Hospitals and Physician Self-Referral Rules; Proposed Collection of Information  
14 Regarding Financial Relationships Between Hospitals and Physicians; Proposed Rule. *73*  
15 *Federal Register* 84. (April 30, 2008): 23542-47.  
16  
17  
18 17. Carter GM, Rogowski JA. The Hospital Relative Value Method as an Alternative for  
19 Recalibrating DRG Relative Weights: RAND/UCLA/Harvard Center for Health Care  
20 Financing Policy Research, 1993.  
21  
22  
23 18. Reinhardt UE. The disruptive innovation of price transparency in health care. *JAMA*  
24 2013;310(18):1927-28.  
25  
26  
27 19. Internal Revenue Service. IRS Exempt Organizations (TE/GE) Hospital Compliance Project  
28 Final Report, 2006:98.  
29  
30 20. Capps C, David G, Carlton D. Antitrust Treatment of Nonprofits: Should Hospitals Receive  
31 Special Care? *University of Chicago George J. Stigler Center for the Study of the*  
32 *Economy and the State Working Paper*. 2010(232).  
33  
34 21. Dobson AJ, DaVanzo J, Doherty J, et al. A Study of Hospital Charge Setting Practices: Lewin  
35 Group, 2005.  
36  
37  
38 22. Lagnado L. California Hospitals Open Books, Showing Huge Price Differences. *Wall Street*  
39 *Journal*. December 27, 2004.  
40  
41 23. Ginsburg PB. Wide variation in hospital and physician payment rates evidence of provider  
42 market power: Center for Studying Health System Change; 2010.  
43  
44 24. Gaynor M, Vogt WB. Competition among hospitals. *RAND J Econ* 2003;34(4):764-85.  
45  
46 25. Melnick GA, Zwanziger J, Bamezai A, et al. The effects of market structure and bargaining  
47 position on hospital prices. *J Health Econ* 1992;11(3):217-33.  
48  
49 26. Vashi AA, Fox JP, Carr BG, et al. Use of hospital-based acute care among patients recently  
50 discharged from the hospital. *JAMA* 2013;309(4):364-71.  
51  
52  
53 27. Podulka J, Stranges E, Steiner C. Hospitalizations Related to Childbirth, 2008: Statistical  
54 Brief #110: Agency for Healthcare Research and Quality, 2011.  
55  
56  
57 28. Truven Health Analytics. The Cost of Having a Baby in the United States, 2013.  
58  
59  
60

- 1
- 2
- 3
- 4 29. Health Resources and Services Administration. Area Resource File: US Department of Health
- 5 and Human Services; 2009.
- 6
- 7 30. Centers for Medicare and Medicaid Services. Historical Impact Files: US Department of
- 8 Health and Human Services; 2011.
- 9
- 10 31. Dranove D, Lindrooth R, White WD, et al. Is the impact of managed care on hospital prices
- 11 decreasing? *J Health Econ* 2008;27(2):362-76.
- 12
- 13 32. Keeler E, Melnick G, Zwanziger J. The changing effects of competition on non-profit and for-
- 14 profit hospital pricing behavior. *J Health Econ* 1999;18(1):69-86.
- 15
- 16 33. Lynk WJ. One DRG, One Price? The Effect of Patient Condition on Price Variation within
- 17 DRGs and across Hospitals. *Int J Health Care Finance Econ* 2001;1(2):111-37.
- 18
- 19 34. Hsia RY, Kothari AH, Srebotnjak T, et al. Health Care as a "Market Good"? Appendicitis as a
- 20 Case Study. *Arch Intern Med* 2012;172(10):818-819.
- 21
- 22 35. Cleary-Goldman J, Malone FD, Vidaver J, et al. Impact of maternal age on obstetric outcome.
- 23 *Obstet Gynecol* 2005;105(5, Part 1):983-90.
- 24
- 25 36. Berkowitz GS, Skovron ML, Lapinski RH, et al. Delayed Childbearing and the Outcome of
- 26 Pregnancy. *N Engl J Med* 1990;322(10):659-64.
- 27
- 28 37. American College of Obstetricians and Gynecologists. Screening for Fetal Chromosomal
- 29 Abnormalities. *Practice Bulletin*, No. 77; 2007.
- 30
- 31 38. Melnick G, Keeler E. The effects of multi-hospital systems on hospital prices. *J Health Econ*
- 32 2007;26(2):400-13.
- 33
- 34 39. California Office of Statewide Health Planning and Development. Calculation of the Office of
- 35 Statewide Health Planning and Development's (OSHPD) Case Mix Index (CMI).
- 36
- 37 40. Agency for Healthcare Research and Quality. Inpatient Quality Indicators Technical
- 38 Specifications, Version 4.4, 2012.
- 39
- 40 41. Davies SM, Geppert JJ, McClellan M, et al. Refinement of the HCUP Quality Indicators:
- 41 Agency for Healthcare Research and Quality. AHRQ Publication No. 01-0035; 2001.
- 42
- 43 42. US Department of Justice and the Federal Trade Commission. Horizontal Merger Guidelines.,
- 44 2010.
- 45
- 46 43. Kaplan RS, Porter ME. How to solve the cost crisis in health care. *Harvard Business Review*
- 47 2011;89(9):46-52.
- 48
- 49 44. Reinhardt U. What Hospitals Charge the Uninsured. *The New York Times* March 15, 2013.
- 50
- 51 45. Ginsburg PB. Shopping for price in medical care. *Health Aff (Millwood)* 2007;26(2):w208-16.
- 52
- 53
- 54
- 55
- 56
- 57
- 58
- 59
- 60



- 1  
2  
3 46. Tompkins CP, Altman SH, Eilat E. The precarious pricing system for hospital services.  
4 *Health Aff (Millwood)* 2006;25(1):45-56.  
5  
6  
7 47. David G, Helmchen LA. The Role of Task Adhesion in Limiting Specialization along the  
8 Medical Care Continuum. *Labour* 2011;25(1):24-44.  
9  
10 48. Reinhardt U. How Do Hospitals Get Paid? A Primer. *The New York Times* January 23, 2009.  
11  
12 49. Shwartz M, Young DW, Siegrist R. The ratio of costs to charges: how good a basis for  
13 estimating costs? *Inquiry* 1995;32(4):476-81.  
14  
15 50. Commonwealth of Massachusetts Division of Health Care Finance and Policy.  
16 Recommendations of the Special Commission on Provider Price Reform, 2011.  
17  
18 51. Massachusetts Attorney General. Examination of Health Care Cost Trends and Cost Drivers:  
19 Report for Annual Public Hearing, 2011.  
20  
21  
22  
23  
24  
25  
26  
27  
28  
29  
30  
31  
32  
33  
34  
35  
36  
37  
38  
39  
40  
41  
42  
43  
44  
45  
46  
47  
48  
49  
50  
51  
52  
53  
54  
55  
56  
57  
58  
59  
60

1  
2  
3  
4  
5  
6  
7  
8  
9  
10  
11  
12  
13  
14  
15  
16  
17  
18  
19  
20  
21  
22  
23  
24  
25  
26  
27  
28  
29  
30  
31  
32  
33  
34  
35  
36  
37  
38  
39  
40  
41  
42  
43  
44  
45  
46  
47  
48  
49  
50  
51  
52  
53  
54  
55  
56  
57  
58  
59  
60

## Tables

Table 1. Characteristics of study sample for uncomplicated vaginal deliveries (DRG 775)

| <b>PATIENT-LEVEL CHARACTERISTICS (n=76,766)</b> |          |                |           |
|-------------------------------------------------|----------|----------------|-----------|
| <b>Age categories</b>                           | <b>N</b> | <b>Percent</b> |           |
| 18-34                                           | 60,175   | 78.39%         |           |
| 35-64                                           | 16,591   | 21.61%         |           |
| <b>Sex</b>                                      |          |                |           |
| Male                                            | 0        | 0.00%          |           |
| Female                                          | 76,766   | 100.00%        |           |
| <b>Private Insurance Type</b>                   |          |                |           |
| Managed Care-Knox Keene                         | 34,387   | 44.79%         |           |
| Managed Care-Other                              | 36,414   | 47.44%         |           |
| Traditional Coverage                            | 5,965    | 7.77%          |           |
| <b>Charlson Comorbidity Index</b>               |          |                |           |
| 0                                               | 75,182   | 97.94%         |           |
| 1                                               | 1,555    | 2.03%          |           |
| 2                                               | 29       | 0.03%          |           |
| <b>Length of Stay</b>                           |          |                |           |
| Less than 3 days                                | 59,724   | 77.80%         |           |
| 3-6 days                                        | 16,826   | 21.92%         |           |
| Greater than 6 days                             | 216      | 0.28%          |           |
| <b>HOSPITAL-LEVEL CHARACTERISTICS (n=198)</b>   |          |                |           |
| <b>Ownership</b>                                |          |                |           |
| Government                                      | 32       | 16.16%         |           |
| NFP                                             | 127      | 64.14%         |           |
| FP                                              | 39       | 19.70%         |           |
| <b>Location</b>                                 |          |                |           |
| Urban                                           | 174      | 87.88%         |           |
| Rural                                           | 24       | 12.12%         |           |
| <b>Teaching Status</b>                          |          |                |           |
| Yes                                             | 20       | 10.10%         |           |
| No                                              | 178      | 89.90%         |           |
| <b>Casemix (severity)</b>                       |          |                |           |
|                                                 | <b>N</b> | <b>Mean</b>    | <b>SD</b> |
| Low                                             | 66       | 1.283          | 0.121     |
| Medium                                          | 66       | 1.555          | 0.053     |
| High                                            | 66       | 1.787          | 0.138     |
| <b>Capacity</b>                                 |          |                |           |
| Licensed Beds                                   | 198      | 280.45         | 180.366   |
| <b>Payer Mix</b>                                |          |                |           |
| % Medicare                                      | 198      | 37.79%         | 12.38%    |
| % Medicaid                                      | 198      | 28.13%         | 15.68%    |

| MARKET-LEVEL CHARACTERISTICS      |     |        |       |
|-----------------------------------|-----|--------|-------|
|                                   | N   | Mean   | SD    |
| <b>Wage Index</b>                 |     |        |       |
| Low                               | 121 | 1.196  | 0.007 |
| Medium                            | 12  | 1.223  | 0.01  |
| High                              | 65  | 1.486  | 0.142 |
| <b>Herfindahl-Hirschman Index</b> |     |        |       |
| Low                               | 67  | 1178   | 629   |
| Medium                            | 70  | 3351   | 721   |
| High                              | 61  | 6831   | 1986  |
| <b>% Without Insurance</b>        | 198 | 18.31% | 3.77% |
| <b>% Below Poverty Line</b>       | 198 | 13.80% | 4.41% |

Table 2. Characteristics of study sample for uncomplicated cesarean sections (DRG 766)

| <b>PATIENT-LEVEL CHARACTERISTICS (n=32,660)</b> |          |                |           |
|-------------------------------------------------|----------|----------------|-----------|
| <b>Age categories</b>                           | <b>N</b> | <b>Percent</b> |           |
| 18-34                                           | 22,694   | 69.49%         |           |
| 35-64                                           | 9,966    | 30.51%         |           |
| <b>Sex</b>                                      |          |                |           |
| Male                                            | 0        | 0.00%          |           |
| Female                                          | 32,660   | 100.00%        |           |
| <b>Private Insurance Type</b>                   |          |                |           |
| Managed Care-Knox Keene                         | 14,696   | 45.00%         |           |
| Managed Care-Other                              | 15,237   | 46.65%         |           |
| Traditional Coverage                            | 2,727    | 8.35%          |           |
| <b>Charlson Comorbidity Index</b>               |          |                |           |
| 0                                               | 31,756   | 97.23%         |           |
| 1                                               | 894      | 2.74%          |           |
| 2                                               | 10       | 0.03%          |           |
| <b>Length of Stay</b>                           |          |                |           |
| Less than 3 days                                | 7,172    | 21.96%         |           |
| 3-6 days                                        | 25,325   | 77.54%         |           |
| Greater than 6 days                             | 163      | 0.50%          |           |
| <b>HOSPITAL-LEVEL CHARACTERISTICS (n=195)</b>   |          |                |           |
| <b>Ownership</b>                                |          |                |           |
| Government                                      | 30       | 15.38%         |           |
| NFP                                             | 127      | 64.14%         |           |
| FP                                              | 38       | 19.49%         |           |
| <b>Location</b>                                 |          |                |           |
| Urban                                           | 171      | 87.69%         |           |
| Rural                                           | 24       | 12.31%         |           |
| <b>Teaching Status</b>                          |          |                |           |
| Yes                                             | 18       | 9.23%          |           |
| No                                              | 177      | 90.77%         |           |
| <b>Casemix (severity)</b>                       |          |                |           |
|                                                 | <b>N</b> | <b>Mean</b>    | <b>SD</b> |
| Low                                             | 65       | 1.287          | 0.125     |
| Medium                                          | 65       | 1.559          | 0.052     |
| High                                            | 65       | 1.789          | 0.138     |
| <b>Capacity</b>                                 |          |                |           |
| Licensed Beds                                   | 195      | 279.672        | 180.807   |
| <b>Payer Mix</b>                                |          |                |           |
| % Medicare                                      | 195      | 37.94%         | 12.06%    |
| % Medicaid                                      | 195      | 27.96%         | 15.64%    |

| <b>MARKET-LEVEL CHARACTERISTICS</b> |          |             |           |
|-------------------------------------|----------|-------------|-----------|
| <b>Wage Index</b>                   | <b>N</b> | <b>Mean</b> | <b>SD</b> |
| Low                                 | 119      | 1.196       | 0.007     |
| Medium                              | 12       | 1.223       | 0.01      |
| High                                | 64       | 1.484       | 0.142     |
| <b>Herfindahl-Hirschman Index</b>   |          |             |           |
| Low                                 | 72       | 1283        | 713       |
| Medium                              | 59       | 3440        | 591       |
| High                                | 64       | 6809        | 2115      |
| <b>% Without Insurance</b>          | 195      | 18.30%      | 3.66%     |
| <b>% Below Poverty Line</b>         | 195      | 13.77%      | 4.43%     |

Table 3. Regression of adjusted charges on hospital and market characteristics for uncomplicated vaginal deliveries

|                                                      | Multiplicative increase<br>for each unit change in<br>predictor | 95% CI<br>lower<br>bound | 95% CI<br>upper<br>bound | p-value |
|------------------------------------------------------|-----------------------------------------------------------------|--------------------------|--------------------------|---------|
| <b>HOSPITAL-LEVEL CHARACTERISTICS</b>                |                                                                 |                          |                          |         |
| <b>Ownership</b>                                     |                                                                 |                          |                          |         |
| Government                                           | -0.096                                                          | -0.249                   | 0.057                    | 0.217   |
| NFP                                                  | Reference                                                       |                          |                          |         |
| FP                                                   | 0.198                                                           | 0.0475                   | 0.348                    | 0.010   |
| <b>Teaching Status</b>                               |                                                                 |                          |                          |         |
| Yes                                                  | -0.049                                                          | -0.317                   | 0.22                     | 0.719   |
| No                                                   | Reference                                                       |                          |                          |         |
| <b>MSA</b>                                           |                                                                 |                          |                          |         |
| Urban                                                | Reference                                                       |                          |                          |         |
| Rural                                                | 0.022                                                           | -0.144                   | 0.19                     | 0.849   |
| <b>Casemix (severity)</b>                            |                                                                 |                          |                          |         |
| Low                                                  | Reference                                                       |                          |                          |         |
| Medium                                               | 0.104                                                           | -0.044                   | 0.252                    | 0.166   |
| High                                                 | 0.196                                                           | 0.044                    | 0.349                    | 0.012   |
| <b>Capacity</b>                                      |                                                                 |                          |                          |         |
| Licensed beds                                        | 0.0003                                                          | -0.0001                  | 0.0007                   | 0.234   |
| <b>Payer Mix</b>                                     |                                                                 |                          |                          |         |
| Proportion Medicare                                  | 0.263                                                           | -0.352                   | 0.878                    | 0.400   |
| Proportion Medicaid                                  | -0.002                                                          | -0.442                   | 0.437                    | 0.992   |
| <b>Quality Indicators</b>                            |                                                                 |                          |                          |         |
| Cesarean delivery rate                               | -0.097                                                          | -2.407                   | 2.212                    | 0.934   |
| Vaginal birth after cesarean rate<br>(uncomplicated) | 0.415                                                           | -0.528                   | 1.357                    | 0.386   |
| Primary cesarean delivery rate                       | 0.208                                                           | -2.32                    | 2.737                    | 0.871   |
| <b>MARKET-LEVEL CHARACTERISTICS</b>                  |                                                                 |                          |                          |         |
| <b>Wage Index</b>                                    |                                                                 |                          |                          |         |
| Low                                                  | Reference                                                       |                          |                          |         |
| Medium                                               | 0.202                                                           | 0.0276                   | 0.376                    | 0.023   |
| High                                                 | 0.409                                                           | 0.271                    | 0.547                    | <0.001  |
| <b>Herfindahl-Hirschman Index (System-wide)</b>      |                                                                 |                          |                          |         |
| Low                                                  | Reference                                                       |                          |                          |         |
| Medium                                               | 0.012                                                           | -0.116                   | 0.139                    | 0.857   |
| High                                                 | 0.005                                                           | -0.14                    | 0.149                    | 0.951   |
| <b>% Without Insurance</b>                           | -0.012                                                          | -0.033                   | 0.009                    | 0.259   |
| <b>% Below Poverty Line</b>                          | 0.013                                                           | -0.005                   | 0.032                    | 0.153   |

Table 4. Regression of adjusted charges on hospital and market characteristics for uncomplicated cesarean sections

|                                                      | Multiplicative increase<br>for each unit change in<br>predictor | 95% CI<br>lower<br>bound | 95% CI<br>upper<br>bound | p-value |
|------------------------------------------------------|-----------------------------------------------------------------|--------------------------|--------------------------|---------|
| <b>HOSPITAL-LEVEL CHARACTERISTICS</b>                |                                                                 |                          |                          |         |
| <b>Ownership</b>                                     |                                                                 |                          |                          |         |
| Government                                           | -0.146                                                          | -0.298                   | 0.006                    | 0.060   |
| NFP                                                  | Reference                                                       |                          |                          |         |
| FP                                                   | 0.172                                                           | 0.032                    | 0.312                    | 0.016   |
| <b>Teaching Status</b>                               |                                                                 |                          |                          |         |
| Yes                                                  | 0.062                                                           | -0.187                   | 0.311                    | 0.626   |
| No                                                   | Reference                                                       |                          |                          |         |
| <b>MSA</b>                                           |                                                                 |                          |                          |         |
| Urban                                                | Reference                                                       |                          |                          |         |
| Rural                                                | 0.088                                                           | -0.081                   | 0.257                    | 0.304   |
| <b>Casemix (severity)</b>                            |                                                                 |                          |                          |         |
| Low                                                  | Reference                                                       |                          |                          |         |
| Medium                                               | 0.087                                                           | -0.052                   | 0.225                    | 0.218   |
| High                                                 | 0.123                                                           | -0.019                   | 0.265                    | 0.088   |
| <b>Capacity</b>                                      |                                                                 |                          |                          |         |
| Licensed beds                                        | -0.0002                                                         | -0.0006                  | 0.0002                   | 0.363   |
| <b>Payer Mix</b>                                     |                                                                 |                          |                          |         |
| Proportion Medicare                                  | 0.491                                                           | -0.004                   | 0.986                    | 0.052   |
| Proportion Medicaid                                  | 0.112                                                           | -0.354                   | 0.578                    | 0.636   |
| <b>Quality Indicators</b>                            |                                                                 |                          |                          |         |
| Cesarean delivery rate                               | 0.491                                                           | -1.659                   | 2.642                    | 0.653   |
| Vaginal birth after cesarean rate<br>(uncomplicated) | 0.508                                                           | -0.315                   | 1.332                    | 0.225   |
| Primary cesarean delivery rate                       | -1.192                                                          | -2.65                    | 2.262                    | 0.877   |
| <b>MARKET-LEVEL CHARACTERISTICS</b>                  |                                                                 |                          |                          |         |
| <b>Wage Index</b>                                    |                                                                 |                          |                          |         |
| Low                                                  | Reference                                                       |                          |                          |         |
| Medium                                               | 0.258                                                           | 0.067                    | 0.449                    | 0.008   |
| High                                                 | 0.378                                                           | 0.26                     | 0.497                    | <0.001  |
| <b>Herfindahl-Hirschman Index (System-wide)</b>      |                                                                 |                          |                          |         |
| Low                                                  | Reference                                                       |                          |                          |         |
| Medium                                               | -0.079                                                          | -0.196                   | 0.037                    | 0.183   |
| High                                                 | 0.012                                                           | -0.116                   | 0.14                     | 0.855   |
| <b>% Without Insurance</b>                           | -0.0003                                                         | -0.02                    | 0.019                    | 0.025   |
| <b>% Below Poverty Line</b>                          | -0.002                                                          | -0.019                   | 0.015                    | 0.813   |

1  
2  
3 **Figure Titles & Legends:**  
4

5  
6 Figure 1. Sample selection  
7

8 (no legend)  
9

10 Figure 2. Adjusted charges and discount prices for uncomplicated vaginal deliveries and  
11 uncomplicated cesarean sections across California hospitals, 2011  
12

13 (no legend)  
14  
15  
16  
17  
18  
19  
20  
21  
22  
23  
24  
25  
26  
27  
28  
29  
30  
31  
32  
33  
34  
35  
36  
37  
38  
39  
40  
41  
42  
43  
44  
45  
46  
47  
48  
49  
50  
51  
52  
53  
54  
55  
56  
57  
58  
59  
60

For peer review only



**Analysis of Variation in Charges and Prices Paid for Vaginal and Cesarean Section Births:****A Cross-Sectional Study**

Renee Y. Hsia, Yaa Akosa Antwi, Ellerie Weber, ~~Emilio Galan~~

Word Count: [3,886](#)

## Author affiliations:

Renee Y. Hsia, MD, MSc (corresponding author)  
Department of Emergency Medicine  
University of California, San Francisco  
1001 Potrero Ave, 1E21, San Francisco General Hospital  
San Francisco, CA 94110  
Tel: (415) 206-4612  
Fax: (415) 206-5818  
Renee.hsia@emergency.ucsf.edu

Yaa Akosa Antwi, PhD  
Department of Economics  
Indiana University Purdue University – Indianapolis  
425 University Boulevard, Cavanaugh Hall, Room 516 □  
Indianapolis, IN 46202  
yakosaan@iupui.edu

Ellerie Weber, PhD  
~~RAND University of Pittsburgh Health Institute Carnegie Mellon University~~ University of  
Texas School of Public Health  
5000 Forbes Ave, Hamburg Hall 1200 Pressler St, RAS -W306 □  
Pittsburgh, PA 15213 Houston, TX 77030  
elleries@emuth.tmc.edu

~~Emilio Galan, BS~~  
~~UC Berkeley – UCSF Joint Medical Program~~  
~~570 University Hall #1190 □~~  
~~University of California, Berkeley □ 94720~~  
~~egalan@berkeley.edu~~

Keywords: hospital charges, obstetrics, cesarean section, health services research

1  
2  
3  
4  
5  
6  
7  
8  
9  
10  
11  
12  
13  
14  
15  
16  
17  
18  
19  
20  
21  
22  
23  
24  
25  
26  
27  
28  
29  
30  
31  
32  
33  
34  
35  
36  
37  
38  
39  
40  
41  
42  
43  
44  
45  
46  
47  
48  
49  
50  
51  
52  
53  
54  
55  
56  
57  
58  
59  
60

## Abstract

*Objective:* To examine the between-hospital variation of charges and discounted prices for uncomplicated vaginal and cesarean section deliveries, and determine the institutional and market-level characteristics that influence adjusted charges.

*Design, Setting, and Participants:* Using data from the California Office of Statewide Health Planning and Development (OSHPD), we conducted a cross-sectional study of all privately insured patients admitted to California hospitals in 2011 for uncomplicated vaginal delivery (DRG 775) or uncomplicated cesarean section (DRG 766).

*Outcome Measures:* Hospital charges and discounted prices adjusted for each patient's clinical and demographic characteristics.

*Results:* We analyzed 76,766 vaginal deliveries and 32,660 cesarean sections in California in 2011. After adjusting for patient demographic and clinical characteristics, we found that the average California woman could be charged as little as \$3,296 or as much as \$37,227 for a vaginal delivery, and \$8,312 - \$70,908 for a cesarean section depending on which hospital she was admitted to. The discounted prices were, on average, 37% of the charges. We found that hospitals in markets with middling competition had significantly lower adjusted charges for vaginal deliveries, while hospitals with higher wage indices and case mixes, as well as for-profit hospitals, had higher adjusted charges. [Hospitals in markets with higher uninsurance rates](#) ~~Government hospitals~~ charged significantly less for cesarean sections, while [for-profit hospitals and hospitals with higher wage indices](#) ~~hospitals in markets with higher uninsurance rates~~ charged more. However, the institutional and market level factors included in our models explained only 35-36% of the between-hospital variation in charges.

*Conclusions:* These results indicate that charges and discounted prices for two common, relatively homogeneous diagnosis groups – uncomplicated vaginal delivery and cesarean section – vary widely between hospitals and are not well explained by observable patient or hospital characteristics.

## Article Summary

### *Article focus:*

- Wide variation in both hospital charges and payment rates has been documented by past studies. However, few studies attempt to explain such variation for episodes of care.
- We aimed to (1) document the variation in charges and discounted prices between California hospitals for the same, average woman's hospital stay for a vaginal birth or cesarean section, and (2) analyze whether hospital or market characteristics could explain that between-hospital variation in charges.

### *Key messages:*

- After adjusting for patient clinical and demographic characteristics, charges for the average California mother's uncomplicated vaginal birth ranged from \$3,296 to \$37,227 depending on which of the 198 hospitals she visited; adjusted charges for cesarean sections ranged from \$8,312 to \$70,908.
- Discounted prices were 37% of charges, on average (range: 5% - 92%)
- For-profit hospitals, hospitals in areas with high costs of living, and hospitals with more severe case-mixes charged more than their counterparts; however, only 35-36% of charges were explained by the observable hospital and market characteristics in our models.

### *Strengths and limitations of this study:*

- Uses a comprehensive dataset of all visits to California hospitals and links to patient and institutional characteristics, allowing for isolation of between-hospital variation and analysis over a complete population.
- Limitations include use of aggregate discount rates to estimate discounted prices paid, potential residual patient-level variation in care intensity, and inability to completely capture hospital quality.

1  
2  
3  
4  
5  
6  
7  
8  
9  
10  
11  
12  
13  
14  
15  
16  
17  
18  
19  
20  
21  
22  
23  
24  
25  
26  
27  
28  
29  
30  
31  
32  
33  
34  
35  
36  
37  
38  
39  
40  
41  
42  
43  
44  
45  
46  
47  
48  
49  
50  
51  
52  
53  
54  
55  
56  
57  
58  
59  
60

**Funding Statement:**

This work was supported by the National Center for Advancing Translational Sciences, National Institutes of Health, through UCSF-CTSI Grant Number KL2 TR000143 (R.Y.H), the Robert Wood Johnson Foundation Physician Faculty Scholars Program (R.Y.H.), and a UCSF Center for Healthcare Value grant. The funding sponsors played no part in the design and conduct of the study; collection, management, analysis and interpretation of the data; and preparation, review, or approval of the manuscript. Its contents are solely the responsibility of the authors and do not necessarily represent the official views of any of the funding agencies.

**Competing Interests:**

None of the authors have any competing interests to report.

## BACKGROUND

United States healthcare expenditures in 2011 totaled \$2.7 trillion dollars in 2011 - 17.7% of US GDP – and are projected to rise steeply in future years.<sup>1</sup> Unlike most other industries, the way healthcare is priced and paid for is notoriously opaque, making it difficult for patients to act as educated, price-comparing consumers.<sup>2</sup> At a time when out of pocket payments for healthcare are increasing,<sup>3</sup> and growing numbers of “consumer directed” high deductible health plans put more pressure on patients to make cost-efficient healthcare decisions,<sup>4,5</sup> the opacity of the system healthcare pricing is increasingly concerning becoming an even greater concern.

Recently, hospital charges have come to the forefront of political, popular, and medical discourse due to their seemingly inexplicable magnitude and devastating effects on specific patients.<sup>6-8</sup> While insurers typically negotiate lower reimbursements, these full, inflated charges are still billed to the 22% of American adults aged 19-64 who are uninsured and to privately insured patients receiving care out of network,<sup>9,10</sup> contributing in large part to the 57% of US bankruptcies that are due to result from medical bills.<sup>11</sup> Further, charges indirectly affect healthcare pricing for all patients. charges are the basis of price negotiations with M many private insurers use charges are the basis of price negotiations;<sup>7,12,13</sup> involved in inpatient diagnosis group weighting and outlier payments by Medicare uses charges in determining inpatient diagnosis group weighting and outlier payments;<sup>14-17</sup> and also must adapt their prices to private-sector prices;<sup>18</sup> -In addition, and hospitals use charges in calculations of uncompensated care, which affect hospital their non-profit status and thus many aspects of their business model, participating insurance plans, and prices.<sup>19,20</sup>

Yet despite their consistent use in many forms of healthcare price setting and hospital bills, charges appear to be nearly random, and are either based on outdated, historical methods or set

1  
2  
3  
4  
5  
6  
7  
8  
9  
10  
11  
12  
13  
14  
15  
16  
17  
18  
19  
20  
21  
22  
23  
24  
25  
26  
27  
28  
29  
30  
31  
32  
33  
34  
35  
36  
37  
38  
39  
40  
41  
42  
43  
44  
45  
46  
47  
48  
49  
50  
51  
52  
53  
54  
55  
56  
57  
58  
59  
60

using ~~opaque~~ idiosyncratic, proprietary formulas.<sup>12 13 21</sup> One hospital administrator called his hospital's method of setting charges "madness."<sup>22</sup> The academic literature has supported this assumption; studies have documented the wide variation in hospital and physician charges and payment rates for the average inpatient stay.<sup>23</sup> Past economics literature has attempted to discern some method to charge setting by documenting the relationship between hospital payment rates and industry organization, and has found for example that less competitive markets have higher predicted prices.<sup>24 25</sup> These studies, however, have mostly addressed broad price ~~indexes~~indices based on aggregate hospital charges.

Given the wide range of procedures and diagnoses that comprise hospitals' inpatient censuses, it is important to evaluate specific, common episodes of care that should have less variation in charges, and are more relevant to patients presenting with a complaint and no knowledge of the specific services they will need. An ideal service is childbirth, the most common reason for hospitalizations in the US,<sup>26</sup> accounting for 4.2 million inpatient stays and \$16.1 billion in hospital costs in 2008.<sup>27</sup> Recently, a study by Truven Health Analytics looked at both charges and discounted prices nationally for vaginal and cesarean childbirth using their own proprietary database of paid medical claims, finding significant variation ~~in~~of both charges and reimbursements.<sup>28</sup> However, the study does not address the possible sources of the variation in charges that it documents.

In this study, we sought to fill this gap by documenting and attempting to explain between-hospital variation in charges for the same, average woman's inpatient stay for vaginal birth or cesarean section in California – relatively homogeneous episodes of care. Our analysis is based on the theory that the variation in charges for these homogeneous episodes of care, once adjusted for patient characteristics, is potentially ~~predicted~~ explained by measurable hospital and

1  
2  
3  
4  
5  
6  
7  
8  
9 [market characteristics that may govern hospital charge-setting behavior](#). We first predict charges  
10 and estimated prices paid at each hospital after adjusting for patient characteristics, and then  
11 ~~determine-explore whether if~~ hospital or market-level characteristics can explain some of this  
12 charge variation.  
13  
14  
15

## 16 17 18 **METHODS**

### 19 **Data Source**

20 We used the 2011 California Office of Statewide Health Planning and Development  
21 (OSHPD) [public](#) Patient Discharge Public Data Set (PDD) to perform our cross-sectional analysis.  
22 The OSHPD PDD captures patient demographic and clinical information, along with charges, for  
23 each inpatient encounter at California hospitals. ~~OSHPD masks selective patient information in  
24 this public dataset to prevent identification of individuals pursuant to the California Health Data  
25 and Advisory Council Consolidation Act, Health and Safety Code section 128675 et seq.~~ Our  
26 study was exempt from review by the Committee on Human Research at the University of  
27 California, San Francisco because we used a public data source that was masked for identifiers.<sup>1</sup>  
28  
29  
30  
31  
32  
33  
34  
35  
36

37 To capture hospital-level characteristics, we used OSHPD's hospital financial and  
38 utilization files for 2011. We also used the 2009 Area Resources File,<sup>29</sup> the most currently  
39 available year, to obtain county-level area percent of uninsurance and poverty, and the Impact  
40 Files from the Centers for Medicare & Medicaid Services (CMS), to obtain [a](#) hospital wage  
41 index.<sup>30</sup>  
42  
43  
44  
45  
46  
47  
48  
49

50 <sup>1</sup> [OSHPD masks selective patient information in this public dataset to prevent identification of  
51 individuals pursuant to the California Health Data and Advisory Council Consolidation Act,  
52 Health and Safety Code section 128675 et seq.](#)  
53  
54

1  
2  
3  
4  
5  
6  
7  
8  
9  
10  
11  
12  
13  
14  
15  
16  
17  
18  
19  
20  
21  
22  
23  
24  
25  
26  
27  
28  
29  
30  
31  
32  
33  
34  
35  
36  
37  
38  
39  
40  
41  
42  
43  
44  
45  
46  
47  
48  
49  
50  
51  
52  
53  
54  
55  
56  
57  
58  
59  
60

### Sample Selection

We limited our study to adult women ( $\geq 18$  years old) who were admitted for diagnosis-related group (DRG) ~~of~~ 775 (uncomplicated vaginal delivery) or 766 (uncomplicated ~~c~~esarean section) at short-term general California hospitals. We also only included privately insured women ([47.5% of DRG 775; 47.1% of DRG 766](#)), as our estimated discount rate only applies to them. Patients admitted to federal hospitals (e.g. Veterans Administration hospitals) are not in our data as OSHPD reporting requirements do not apply to such hospitals. Also, [privately insured](#) women who receive care through the Kaiser Permanente network ~~are absent~~[were excluded](#), as ~~they~~ [Kaiser hospitals](#) do not report charges to the state ([29.4% of DRG 775; 19.7% of DRG 766](#)).

To restrict our sample to a relatively healthy and more homogenous population, we excluded patients who died in the hospital or who did not have a routine discharge. We further excluded patients without a valid age group or gender recorded, as we could not accurately adjust for their demographic predictors of charge. We also excluded patients with invalid charges, those receiving ~~charit~~[able](#) care, and those with charges [too large to fit within the charge variable's character limit](#)~~exceeding the cell size limit~~. Finally, we excluded patients visiting hospitals that did not report a wage index. See Figure 1 for a full description of the applied exclusions.

### Outcome

Our first outcome was hospital charges, which are the total dollar amounts billed by the hospital for each admission, excluding physician fees. These charges reflect the hospital's full, established rates before contractual adjustments and prepayments.

Our secondary outcome was estimated discounted prices, or the amounts which hospitals received from private insurers for the services their enrollees received. We obtained this by



1  
2  
3  
4  
5  
6  
7  
8  
9 multiplying the total hospital charge billed to the patient ~~by with~~ the hospital's average hospital  
10 discount rate for privately insured patients. As done in previous literature, the is discount ~~factor~~  
11 rate for privately insured patients at each hospital was calculated using the formula: (gross  
12 inpatient revenue + gross outpatient revenue - contractual adjustments)/(gross inpatient revenue +  
13 gross outpatient revenue).<sup>24 31</sup> We obtained these amounts through the 2011 OSHPD financial  
14 files for each hospital.

### 21 22 **Statistical analysis**

23 Our analysis is similar to the two-stage approach used by previous economic analyses.<sup>24 32</sup>

24 The approach first separates out patient-level charge variation within each hospital and estimates  
25 childbirth charges for the average California woman at each hospital, and then looks at the  
26 independent influence of the hospital and market characteristics on variation in those estimated  
27 charges across hospitals. Estimates from Athis two-stage approach can be mapped to estimates  
28 from accomplishes the same clustering of charges by hospital as hierarchical modelings, in the  
29 sense that they allow for random effects in the intercept coefficient. However, for our purposes,  
30 the two-stage model is but is preferable because we are interested in explaining variation in  
31 expected charges using observable hospital characteristics. ... The approach first separates out  
32 charge variation within each hospital and estimate charges for childbirth for a woman with  
33 identical observable characteristics at each hospital. Then, using the one observation of charge for  
34 the theoretical identical and average woman for each hospital, the independent influence of the  
35 hospital characteristics on charges can be determined. For all analyses, charges are logged to  
36 account for the right skew. We performed separate analysis for each DRG.

Formatted: Font: Italic

1  
2  
3  
4  
5  
6  
7  
8  
9  
10  
11  
12  
13  
14  
15  
16  
17  
18  
19  
20  
21  
22  
23  
24  
25  
26  
27  
28  
29  
30  
31  
32  
33  
34  
35  
36  
37  
38  
39  
40  
41  
42  
43  
44  
45  
46  
47  
48  
49  
50  
51  
52  
53  
54  
55  
56  
57  
58  
59  
60

In the first stage, to control for patient-level variation in charges, we regressed [logged](#) raw charges on patient characteristics [shown in previous literature to be correlated with charges for the price indices and line item charges](#).<sup>33 34</sup> ~~For all analyses, charges are logged to account for the right skew. These~~ Patient characteristics included ~~ing~~ age (in two categories: 18-34, and  $\geq 35$ ), number of conditions present on admission, Charlson comorbidities, and length of stay. [We chose the 18-34 and  \$\geq 35\$  maternal age groups because 35 years old is the cutoff at which the American Congress of Obstetricians and Gynecologists generally defines “advanced maternal age,” which has been associated with increased risk of complications for both the mother and the infant](#).<sup>35-37</sup> Because length of stay is [also](#) often right-skewed, we transformed it to log (length of stay + 1). We included three different types of private insurance, including two forms of managed care (Knox-Keene/Medi-Cal County Organized Health System, or other), and traditional private coverage. To control for unobservable within-hospital factors that could affect variation, we also included a dummy variable for each hospital. [Errors from this regression are clustered at the hospital level. Results of these regressions are shown in Supplementary Tables 1 & 2.](#)

From this regression, we then calculated a given hospital’s adjusted charge for the average statewide patient for that DRG, where the adjusted charges represented standardized log charge/(day + 1). This gave us a single adjusted [charge per day](#) for each hospital, representing the predicted charge for a patient with the same, average clinical and demographic characteristics, which we then used as the dependent variable in our second-stage regression.

In the second stage, we regressed our adjusted [logged](#) charges on hospital and market level factors cited by previous literature as related to broad price indices,<sup>24 32 38</sup> to determine which characteristics explain observed between-hospital variation in charges for childbirth. Hospital-level factors included ownership (not-for-profit, for-profit, government), teaching status,

Formatted: Indent: First line: 0.5"

1  
2  
3  
4  
5  
6  
7  
8  
9 urban/rural location, capacity (number of licensed beds), patient payer mix (proportion Medicare,  
10 Medicaid), and case-mix (which was used to adjust the average cost per patient for a given  
11 hospital relative to the adjusted average cost for other hospitals).<sup>39</sup> We also incorporated three  
12 quality measures from the Agency for Healthcare Research Quality's Inpatient Quality Indicators  
13 (IQIs): cesarean delivery rate, vaginal birth after cesarean rate (uncomplicated), and primary  
14 caesarian delivery rate.<sup>40</sup> These utilization indicators are intended to capture either over-use of  
15 procedures found to be unnecessary or low quality, or under-use of procedures with merit, such as  
16 vaginal birth after prior cesarean delivery.<sup>41</sup> We further incorporated market-level factors  
17 including [the](#) wage index, percent uninsured in the county, percent below the poverty line in the  
18 county, as well as the system-wide Herfindahl-Hirschman Index (HHI).

19  
20  
21  
22  
23  
24  
25  
26  
27  
28 The HHI is a widely used economic measure of [the](#) degree of competition faced by a  
29 company, or in this case hospital, within its market.<sup>42</sup> It is calculated as the sum of the squares of  
30 market shares for each hospital in a given market. Higher HHIs are associated with less  
31 competition, while lower HHIs indicate more competitive markets. We calculated these shares of  
32 patients directly from the hospital discharge data. Our HHI calculation also accounts for  
33 membership in a hospital system, which has been shown to influence hospital price setting.<sup>38</sup>

## 40 RESULTS

### 41 Sample

42  
43  
44 We analyzed a sample of 76,766 uncomplicated vaginal deliveries, and 32,660  
45 uncomplicated cesarean sections in 2011 across [198 and 195](#) California [hospitals, respectively](#). As  
46 shown in Table 1, 78.4% of women with uncomplicated vaginal deliveries were between the ages  
47 of 18-34, and 97.9% had a Charlson comorbidity index of 0, indicating that they were relatively  
48  
49  
50  
51  
52  
53  
54  
55  
56  
57  
58  
59  
60

1  
2  
3  
4  
5  
6  
7  
8  
9  
10  
11  
12  
13  
14  
15  
16  
17  
18  
19  
20  
21  
22  
23  
24  
25  
26  
27  
28  
29  
30  
31  
32  
33  
34  
35  
36  
37  
38  
39  
40  
41  
42  
43  
44  
45  
46  
47  
48  
49  
50  
51  
52  
53  
54  
55  
56  
57  
58  
59  
60

healthy. The length of stay for 77.8% of these women was less than 3 days. For the 32,660 women with uncomplicated cesarean sections (Table 2), the majority (69.5%) were again between ages 18-34, almost all (97.2%) had a Charlson comorbidity index of 0, and 77.5% had a hospital stay between 3 to 6 days. For both DRGs, the majority of hospitals were not-for-profit, non-teaching hospitals located in urban areas.

### Charges

We found that the raw charges for uncomplicated vaginal birth ranged from \$3,344 to \$43,715, with a median charge of \$15,278 (IQR \$7,981). Once adjusted for patient clinical and demographic characteristics, charges for the average patient ranged from \$3,296 to \$37,227, depending on which of the 198 hospitals she visited (median \$14,620; IQR \$7,643). For uncomplicated cesarean sections, the raw charges ranged from \$7,905 to \$72,569, with a median charge of \$27,517 (IQR \$14,206). Adjusted charges ranged from \$8,312 to \$70,908 with a median charge of \$27,481 (IQR \$12,525), again for a patient with the same average characteristics.

### Estimated discounted price

Discounted prices paid by private insurers ranged from 5% to 92% of the charge, with an average of 37%. Discounted prices for vaginal deliveries ranged from \$835 to \$12,873 (median \$5,123; IQR \$3,827), and prices for cesarean sections varied from \$1,135 to \$28,105 (median \$9,640; IQR \$6,631). For vaginal births, the largest difference between a hospital's adjusted charge and estimated discount price was \$29,217, where it charged \$33,593 for an average patient, almost eight times the \$4,376 it finally received from insurers. The smallest difference was just

1  
2  
3  
4  
5  
6  
7  
8  
9 \$920, where the hospital's average charge (\$11,251) was a mere 109% higher than its estimated  
10 price (\$10,332). For uncomplicated cCesarean sections, the differences were even more dramatic  
11 – one hospital charged 1899% of what it typically received, while another charged 124%. Figure  
12  
13 2 illustrates the differences between the adjusted charges and discounted prices for each hospital  
14  
15 in our dataset for the two conditions.  
16  
17

### 18 19 20 **Hospital and market-level factors**

21  
22 In the multivariate model using adjusted charges across hospitals as the dependent  
23 variable, for uncomplicated vaginal delivery, hospitals with for-profit ownership, severe case-  
24 mixes, and high wage indices charged significantly more than their counterparts (Table 3).  
25  
26

27  
28 For uncomplicated cCesarean section (Table 4), again charge was associated with  
29 ownership. Government-owned hospitals had 14.6% lower charges (95% CI -29.8, 0.6), while  
30 for-profit hospitals had 17.2% higher charges (95% CI 3.2, 31.2) than non-profit hospitals. This  
31  
32 implies that if the mean charge for uncomplicated cCesarean section, \$29,480, was offered at a  
33 non-profit hospital, the adjusted charge in a government hospital would be \$25,176 and the  
34 adjusted charge in a for-profit hospital would be \$34,551. Also similar to our findings with  
35 uncomplicated vaginal births, hospitals with higher labor costs (wage index) had higher charges.  
36  
37 The case-mix was no longer predictive, but a higher rate of percent uninsured in the county was  
38 significantly correlated with lower charges. Though the significance was marginal, the  
39 proportion of patients covered by Medicare was also associated with higher charges.  
40  
41  
42  
43  
44  
45  
46  
47

### 48 **DISCUSSION**

49  
50  
51  
52  
53  
54  
55  
56  
57  
58  
59  
60

1  
2  
3  
4  
5  
6  
7  
8  
9 Our results demonstrate the wide variability of charges and prices for childbirth between  
10 hospitals, even after controlling for patient characteristics, and point to specific institutional and  
11 market-level factors that affect those standardized charges. Even after adjusting for patient  
12 demographic and clinical characteristics, we found that charges for vaginal births ranged from  
13 \$3,296 to \$37,227, and charges for cesarean sections ranged from \$8,312 to \$70,908, depending  
14 only on which hospital the average California woman giving birth visited. That implies that, after  
15 adjusting for patient characteristics, the highest hospital charge was more than 11 times that of the  
16 lowest hospital charge for vaginal births, and more than 8.5 times that of the lowest hospital  
17 charge for cesarean section births. Without adjusting for patient characteristics, the hospital with  
18 the highest charges would charge about 13 times more than the hospital with the lowest charges  
19 for vaginal births, and about 9 times more than the hospital with the lowest charges for cesarean  
20 sections. While the variation of adjusted charges is, as expected, smaller than the variation in raw  
21 charges between hospitals, the very small difference between the two implies that service-  
22 intensity and patient observable factors provide little explanation for variation in charges between  
23 hospitals.

24  
25  
26  
27  
28  
29  
30  
31  
32  
33  
34  
35  
36  
37 Our findings show that some hospital and market-level factors, on the other hand, do  
38 clearly impact the differences in charges between hospitals. We find a positive relationship  
39 between charges for childbirth and hospital wage index, case-mix index, [and](#) for-profit ownership  
40 [and county percent uninsured](#). However, it is probably more notable how *few* of the hospital and  
41 market-level regressors are significant in explaining the variation. Our vaginal and cesarean  
42 delivery models account for only 36% and 35%, respectively, of the variation observed between  
43 hospitals in adjusted charges. This implies that either the variation is a result of (a) unobservable  
44 hospital characteristics or (b) pure noise.

1  
2  
3  
4  
5  
6  
7  
8  
9 Based on findings from ~~past literature~~the existing literature, we hypothesize that ~~the~~  
10 variation we find is more likely random than due to unobservable hospital characteristics~~the pure~~  
11 noise explanation is more likely. A MedPAC study of hospitals found that many items on  
12 chargemasters were based on historical prices, which were formulated before it was possible to  
13 accurately estimate costs.<sup>21</sup> Even today, the survey found that only a third of hospitals reported  
14 any concern regarding covering operating costs when updating their chargemasters. Rather, most  
15 were concerned with conforming to regulations and maintaining their overall bottom line.<sup>21</sup> Today,  
16 even for new services providers are not incentivized to set charges based on costs, because third  
17 party payments are largely not based on true costs for a given service.<sup>12 23</sup> This therefore precludes  
18 a valuable correlation between cost and charge and thus an anchor on which charge variation  
19 would be limited.<sup>12</sup> In addition, the current ~~mis~~correlation-lack of correlation between cost and  
20 charge is exacerbated by simplistic “updates” in the form of across the board percentage increases  
21 of charges, often resulting in certain services subsidizing others to manage the overall solvency of  
22 the hospital or department.<sup>12 21 43</sup> Thus, our results again confirm the documented lack of  
23 comprehensible or at least measurable sense in the chargemaster system.

24  
25  
26  
27  
28  
29  
30  
31  
32  
33  
34  
35  
36  
37 The troubling part of this largely random variation is that charges do still matter to patients  
38 and to hospitals in many ways. The 41.9 million uninsured Americans, along with privately  
39 insured patients visiting an out-of-network hospital may be faced with the full charges for their  
40 care, which are typically so high that few patients can pay them, resulting in need for charity care,  
41 sliding scale payments, or often bad debt on the patient’s part.<sup>13 44</sup> In addition, as some private  
42 insurers still negotiate discounts off charges, especially in fee-for-service (FFS) systems, and use  
43 charges to benchmark the relative weights of-in their prospective payment systems, higher  
44 charges can lead to higher out of pocket payments for patients.<sup>3 12 13</sup> Medicare also compares  
45  
46  
47  
48  
49  
50  
51  
52  
53  
54  
55  
56  
57  
58  
59  
60

1  
2  
3  
4  
5  
6  
7  
8  
9 charges between DRG groups modified by cost-to-charge ratios calculated at the cost center level  
10 to determine the relative weight of DRG's and identify qualifying outlier payments within  
11 DRGs.<sup>14-17</sup> Finally, many hospitals use charges to calculate their uncompensated care costs, which  
12 affect their not-for-profit and hence tax exempt status. In fact, the IRS found that 18-20% of  
13 hospitals include the difference between charges and allowed payments by private insurers, and  
14 50% include the difference between charges and payments received from the uninsured in their  
15 uncompensated care calculations.<sup>19 20</sup>

16  
17  
18  
19  
20  
21  
22 A secondary finding in this study is the large discrepancy between hospitals' predicted  
23 charges and their estimated discounts. Our finding [of that insurers pay an average 37% discount](#)  
24 [of charges](#) is supported by previous literature showing that private insurers pay on average 39% of  
25 the charge for hospital inpatient services.<sup>45 46</sup> We estimated median payments of \$5,123 for  
26 vaginal and \$9,640 for cesarean section births, slightly lower than the Truven estimates of \$8,519  
27 and \$12,894, respectively.<sup>28</sup> The difference between the adjusted charge and discounted price  
28 estimates what could be considered "excess charges", and in 2011 sums to \$1.36 billion dollars  
29 for all uncomplicated vaginal and cesarean births in California (\$760.1 million for uncomplicated  
30 vaginal deliveries; \$601.1 million for uncomplicated cesarean sections).

31  
32  
33  
34  
35  
36  
37  
38  
39 Past literature has speculated two reasons for high charges relative to reimbursements.  
40 First is the change in Medicare's reimbursement protocol from the historical cost-plus  
41 reimbursement system to today's prospective payment system.<sup>43</sup> Because providers were paid a  
42 percentage above the charged rate, it was in the providers' financial interest to maintain exorbitant  
43 charges, a practice that has persisted despite the change in reimbursement. Second, in ~~fee-for-~~  
44 service payments for which reimbursements are simple discounts of charges, hospitals are  
45 incentivized to raise their charges in an effort to increase reimbursement. Finally, hospitals may  
46  
47  
48  
49  
50  
51  
52  
53  
54  
55  
56  
57  
58  
59  
60



1  
2  
3  
4  
5  
6  
7  
8  
9 be setting artificially inflated charges to increase the nominal value of their uncompensated care  
10 indices, which are based on charges.<sup>20 47</sup>  
11  
12  
13

#### 14 **Limitations of Research**

15  
16 There are several limitations of this study. First, we used DRGs to determine what  
17 constituted an episode of care. The MS-DRG system was designed to classify patients into groups  
18 based on likely utilization of services and accumulation of costs. However, because the  
19 administrative data we used does not provide charge itemization, it is very likely that some  
20 women received greater “intensity” of services in unobservable ways. For instance, if one woman  
21 received an epidural, and another woman did not, we might expect the woman with the epidural  
22 to have higher charges. As much as possible, we are minimizing fallout from this limitation by  
23 using observable attributes of the episode (e.g. length-of-stay, discharge, comorbidities) in our  
24 first-stage regression, which should absorb some of the patient-level differences in care intensity.  
25 It is possible, however, that if unobservable patient characteristics affecting intensity of care are  
26 correlated with hospital characteristics, we might expect our second stage estimates to be biased.  
27  
28 On the other hand, if treatment intensity is a hospital-level characteristic, then our analysis does  
29 accurately capture this.  
30  
31  
32  
33  
34  
35  
36  
37  
38  
39

40 Second, our brief analysis of discounted prices is limited by the fact that we must estimate  
41 discount rates, since insurers and providers carefully guard their actual payment rates as  
42 proprietary. The financial data we used is self-reported, and thus the accuracy of our estimates is  
43 dependent on the accuracy of hospital reporting to OSHPD. However, inaccuracies are not a big  
44 concern as OSHPD performs systematic financial audits of their data. Further, the discount rates  
45 are hospital-wide and aggregate across all insurers, while negotiations regarding discount rates  
46  
47  
48  
49  
50  
51  
52  
53  
54

1  
2  
3  
4  
5  
6  
7  
8  
9 granted by a given hospital may vary widely by particular insurer and according to DRG or cost  
10 center. It is partly because of this significant limitation that we chose to focus our main results on  
11 charges and the factors affecting them. That said, our estimated prices were roughly consistent  
12 with the Truven study, which did have access to claims-based prices paid.<sup>28</sup> In addition,  
13 discounted rates negotiated by insurers have been found to be broadly applied to wide swaths of  
14 services, as the main goal of such negotiations is overall solvency.<sup>48</sup> Further, modifications to  
15 charges at the aggregate level are regularly used in institutional practice, such as cost to charge  
16 ratios used by Centers for Medicare and Medicaid Services (CMS) to estimate outlier payments,  
17 which have been shown to be imperfect but generally appropriate estimates of cost.<sup>49</sup>

18  
19  
20  
21  
22  
23  
24  
25  
26 Third, our study only examines charges in California. Though California is a large, diverse  
27 state, our results cannot be generalized to the entire nation. Last, our study could not examine the  
28 full effect of quality of care on hospital price premiums, though we included select quality  
29 indicators. However, it is difficult to imagine that these variations could be attributed entirely to  
30 quality, given numerous studies demonstrating that both charges and payments are unrelated to  
31 quality, which we similarly found in our analysis of three quality measures.<sup>50 51</sup>

## 32 33 34 35 36 37 38 39 **CONCLUSIONS**

40 For the same average patient in California, we find that charges for uncomplicated vaginal  
41 delivery ranged from \$3,296 to \$37,227 (median: \$14,620), and charges for uncomplicated  
42 cesarean section ranged from \$8,312 to \$70,908 (median: \$27,481) depending on which hospital  
43 she visited. Hospital ownership, case-mix, wage index, percent uninsured in the county, and  
44 market competitiveness had a significant impact on these adjusted charges. Estimated discounted  
45 prices averaged 37% of the adjusted charges. Our findings indicate that the charge faced by a  
46  
47  
48  
49  
50  
51  
52  
53  
54

1  
2  
3  
4  
5  
6  
7  
8  
9 patient for a common obstetrical procedure is significantly influenced by institutional and market-  
10 level factors outside of her own presentation, but that the majority of variation in charges between  
11 hospitals she could visit remains unexplained. Our results also suggest significant room for  
12 improved methodologies, incentives, and policy interventions for accurately estimating and  
13 presenting charges and ultimate costs.  
14  
15  
16  
17  
18  
19  
20  
21  
22  
23  
24  
25  
26  
27  
28  
29  
30  
31  
32  
33  
34  
35  
36  
37  
38  
39  
40  
41  
42  
43  
44  
45  
46  
47  
48  
49  
50  
51  
52  
53  
54  
55  
56  
57  
58  
59  
60

1  
2  
3  
4  
5  
6  
7  
8  
9  
10  
11  
12  
13  
14  
15  
16  
17  
18  
19  
20  
21  
22  
23  
24  
25  
26  
27  
28  
29  
30  
31  
32  
33  
34  
35  
36  
37  
38  
39  
40  
41  
42  
43  
44  
45  
46  
47  
48  
49  
50  
51  
52  
53  
54  
55  
56  
57  
58  
59  
60

### Authors' Contributions

RYH conceived of the study, obtained the data, directed and interpreted the analyses, and helped draft and edit the manuscript. YAA helped conceive the study design, analyzed the data, interpreted the results, and edited the manuscript. EW [contributed to methodological design](#), analyzed the data and interpreted the results, and helped with editing of the manuscript. EG ~~conducted background research, helped in interpreting the results, drafted the manuscript, and assisted in editing~~. All authors have read and approved the final manuscript.

### Acknowledgements

We especially thank Julia Brownell, BA, [and Emilio Galan, BS](#), for ~~their~~ editorial [and technical](#) assistance.

**REFERENCES:**

1. Office of the Actuary. National Health Expenditure Projections 2011-2021: Centers for Medicare and Medicaid Services, 2011.
2. Government Accountability Office (GAO). Meaningful Price Information Is Difficult for Consumers to Obtain Prior to Receiving Care. GAO-11-791; 2011.
3. Truffer CJ, Keehan S, Smith S, Cylus J, Sisko A, Poisal JA, et al. Health spending projections through 2019: the recession's impact continues. *Health Aff (Millwood)* 2010;29(3):522-29.
4. The Kaiser Family Foundation, Health Research & Educational Trust. Employer Health Benefits 2012 Annual Survey, 2012.
5. Robinson JC, Ginsburg PB. Consumer-driven health care: promise and performance. *Health Aff (Millwood)* 2009;28(2):w272-81.
6. Brill S. Bitter Pill: Why Medical Bills Are Killing Us. *TIME Magazine* Feb 20, 2013.
7. Selberg J, Marks CM. A Problem Too Big to See: The Sobering Reality of Hospital Pricing: Institute for Healthcare Improvement; 2013.
8. Salam R. Guest Post by Oren Cass: What Steven Brill Gets Wrong on U.S. Health Care Costs. *The National Review Online*. Feb 28, 2013.
9. Anderson GF. From 'Soak The Rich' To 'Soak The Poor': Recent Trends In Hospital Pricing. *Health Aff (Millwood)* 2007;26(3):780-89.
10. DeNavas-Walt C, Proctor B, Smith J. Income, Poverty, and Health Insurance Coverage in the United States: 2011. In: Bureau UC, editor. *Current Population Reports*. Washington, D.C., 2012.
11. Himmelstein DU, Thorne D, Warren E, Woolhandler S. Medical Bankruptcy in the United States, 2007: Results of a National Study. *Am J Med* 2009;122(8):741-46.
12. Ginsburg PB, Grossman JM. When the price isn't right: how inadvertent payment incentives drive medical care. *Health Aff (Millwood)* 2005;W5.
13. Reinhardt UE. The Pricing Of U.S. Hospital Services: Chaos Behind A Veil Of Secrecy. *Health Aff (Millwood)* 2006;25(1):57-69.
14. Medicare Program; Change in Methodology for Determining Payment for Extraordinarily High-Cost Cases (Cost Outliers) Under the Acute Care Hospital Inpatient and Long-Term Care Hospital Prospective Payment Systems; Final Rule. 68 *Federal Register* 110. (June 9, 2003): 34494-504.
15. Medicare Program; Changes to the Hospital Inpatient Prospective Payment Systems and Fiscal Year 2007 Rates; Fiscal Year 2007 Occupational Mix Adjustment to Wage Index;

1  
2  
3  
4  
5  
6  
7  
8  
9  
10  
11  
12  
13  
14  
15  
16  
17  
18  
19  
20  
21  
22  
23  
24  
25  
26  
27  
28  
29  
30  
31  
32  
33  
34  
35  
36  
37  
38  
39  
40  
41  
42  
43  
44  
45  
46  
47  
48  
49  
50  
51  
52  
53  
54  
55  
56  
57  
58  
59  
60

Health Care Infrastructure Improvement Program; Selection Criteria of Loan Program for Qualifying Hospitals Engaged in Cancer-Related Health Care and Forgiveness of Indebtedness; and Exclusion of Vendor Purchases Made Under the Competitive Acquisition Program (CAP) for Outpatient Drugs and Biologicals Under Part B for the Purpose of Calculating the Average Sales Price (ASP); Final Rules & Interim Final Rule With Comment Period. 71 *Federal Register* 160. (August 18, 2006): 47870 -8351.

16. Medicare Program; Proposed Changes to the Hospital Inpatient Prospective Payment Systems and Fiscal Year 2009 Rates; Proposed Changes to Disclosure of Physician Ownership in Hospitals and Physician Self-Referral Rules; Proposed Collection of Information Regarding Financial Relationships Between Hospitals and Physicians; Proposed Rule. 73 *Federal Register* 84. (April 30, 2008): 23542-47.
17. Carter GM, Rogowski JA. The Hospital Relative Value Method as an Alternative for Recalibrating DRG Relative Weights: RAND/UCLA/Harvard Center for Health Care Financing Policy Research, 1993.
18. Reinhardt UE. The disruptive innovation of price transparency in health care. *JAMA* 2013;310(18):1927-28.
19. Internal Revenue Service. IRS Exempt Organizations (TE/GE) Hospital Compliance Project Final Report, 2006:98.
20. Capps C, David G, Carlton D. Antitrust Treatment of Nonprofits: Should Hospitals Receive Special Care? *University of Chicago George J. Stigler Center for the Study of the Economy and the State Working Paper*. 2010(232).
21. Dobson AJ, DaVanzo J, Doherty J, Tanamor M. A Study of Hospital Charge Setting Practices: Lewin Group, 2005.
22. Lagnado L. California Hospitals Open Books, Showing Huge Price Differences. *Wall Street Journal*. December 27, 2004.
23. Ginsburg PB. Wide variation in hospital and physician payment rates evidence of provider market power: Center for Studying Health System Change; 2010.
24. Gaynor M, Vogt WB. Competition among hospitals. *RAND J Econ* 2003;34(4):764-85.
25. Melnick GA, Zwanziger J, Bamezai A, Pattison R. The effects of market structure and bargaining position on hospital prices. *J Health Econ* 1992;11(3):217-33.
26. Vashi AA, Fox JP, Carr BG, D'Onofrio G, Pines JM, Ross JS, et al. Use of hospital-based acute care among patients recently discharged from the hospital. *JAMA* 2013;309(4):364-71.
27. Podulka J, Stranges E, Steiner C. Hospitalizations Related to Childbirth, 2008: Statistical Brief #110: Agency for Healthcare Research and Quality, 2011.

- 1
- 2
- 3
- 4
- 5
- 6
- 7
- 8
- 9 28. Truven Health Analytics. The Cost of Having a Baby in the United States, 2013.
- 10 29. Health Resources and Services Administration. Area Resource File: US Department of Health
- 11 and Human Services; 2009.
- 12
- 13 30. Centers for Medicare and Medicaid Services. Historical Impact Files: US Department of
- 14 Health and Human Services; 2011.
- 15
- 16 31. Dranove D, Lindrooth R, White WD, Zwanziger J. Is the impact of managed care on hospital
- 17 prices decreasing? *J Health Econ* 2008;27(2):362-76.
- 18
- 19 32. Keeler E, Melnick G, Zwanziger J. The changing effects of competition on non-profit and for-
- 20 profit hospital pricing behavior. *J Health Econ* 1999;18(1):69-86.
- 21
- 22 33. Lynk WJ. One DRG, One Price? The Effect of Patient Condition on Price Variation within
- 23 DRGs and across Hospitals. *Int J Health Care Finance Econ* 2001;1(2):111-37.
- 24
- 25 34. Hsia RY, Kothari AH, Srebotnjak T, Maselli J. Health Care as a "Market Good"? Appendicitis
- 26 as a Case Study. *Arch Intern Med* 2012;172(10):818-819.
- 27
- 28 35. Cleary-Goldman J, Malone FD, Vidaver J, Ball RH, Nyberg DA, Comstock CH, et al. Impact
- 29 of maternal age on obstetric outcome. *Obstet Gynecol* 2005;105(5, Part 1):983-90.
- 30
- 31 36. Berkowitz GS, Skovron ML, Lapinski RH, Berkowitz RL. Delayed Childbearing and the
- 32 Outcome of Pregnancy. *N Engl J Med* 1990;322(10):659-64.
- 33
- 34 37. American College of Obstetricians and Gynecologists. Screening for Fetal Chromosomal
- 35 Abnormalities. *Practice Bulletin*, No. 77; 2007.
- 36
- 37 38. Melnick G, Keeler E. The effects of multi-hospital systems on hospital prices. *J Health Econ*
- 38 2007;26(2):400-13.
- 39
- 40 39. California Office of Statewide Health Planning and Development. Calculation of the Office of
- 41 Statewide Health Planning and Development's (OSHPD) Case Mix Index (CMI).
- 42
- 43 40. Agency for Healthcare Research and Quality. Inpatient Quality Indicators Technical
- 44 Specifications, Version 4.4, 2012.
- 45
- 46 41. Davies SM, Geppert JJ, McClellan M, McDonald KM, Romano PS, Shojania KG. Refinement
- 47 of the HCUP Quality Indicators: Agency for Healthcare Research and Quality. AHRQ
- 48 Publication No. 01-0035; 2001.
- 49
- 50 42. US Department of Justice and the Federal Trade Commission. Horizontal Merger Guidelines.,
- 51 2010.
- 52
- 53 43. Kaplan RS, Porter ME. How to solve the cost crisis in health care. *Harvard Business Review*
- 54 2011;89(9):46-52.
- 55
- 56 44. Reinhardt U. What Hospitals Charge the Uninsured. *The New York Times* March 15, 2013.
- 57
- 58
- 59
- 60

- 1
- 2
- 3
- 4
- 5
- 6
- 7
- 8
- 9 45. Ginsburg PB. Shopping for price in medical care. *Health Aff (Millwood)* 2007;26(2):w208-16.
- 10
- 11 46. Tompkins CP, Altman SH, Eilat E. The precarious pricing system for hospital services.
- 12 *Health Aff (Millwood)* 2006;25(1):45-56.
- 13
- 14 47. David G, Helmchen LA. The Role of Task Adhesion in Limiting Specialization along the
- 15 Medical Care Continuum. *Labour* 2011;25(1):24-44.
- 16
- 17 48. Reinhardt U. How Do Hospitals Get Paid? A Primer. *The New York Times* January 23, 2009.
- 18
- 19 49. Schwartz M, Young DW, Siegrist R. The ratio of costs to charges: how good a basis for
- 20 estimating costs? *Inquiry* 1995;32(4):476-81.
- 21
- 22 50. Commonwealth of Massachusetts Division of Health Care Finance and Policy.
- 23 Recommendations of the Special Commission on Provider Price Reform, 2011.
- 24
- 25 51. Massachusetts Attorney General. Examination of Health Care Cost Trends and Cost Drivers:
- 26 Report for Annual Public Hearing, 2011.
- 27
- 28
- 29
- 30
- 31
- 32
- 33
- 34
- 35
- 36
- 37
- 38
- 39
- 40
- 41
- 42
- 43
- 44
- 45
- 46
- 47
- 48
- 49
- 50
- 51
- 52
- 53
- 54
- 55
- 56
- 57
- 58
- 59
- 60



1  
2  
3  
4  
5  
6  
7  
8  
9 **Tables**

10 | Table 1. Characteristics of study sample for uncomplicated vaginal deliveries (DRG 775)

| <b>PATIENT-LEVEL CHARACTERISTICS (n=76,766)</b> |          |                |           |
|-------------------------------------------------|----------|----------------|-----------|
| <b>Age categories</b>                           | <b>N</b> | <b>Percent</b> |           |
| 18-34                                           | 60,175   | 78.39%         |           |
| 35-64                                           | 16,591   | 21.61%         |           |
| <b>Sex</b>                                      |          |                |           |
| Male                                            | 0        | 0.00%          |           |
| Female                                          | 76,766   | 100.00%        |           |
| <b>Private Insurance Type</b>                   |          |                |           |
| Managed Care-Knox Keene                         | 34,387   | 44.79%         |           |
| Managed Care-Other                              | 36,414   | 47.44%         |           |
| Traditional Coverage                            | 5,965    | 7.77%          |           |
| <b>Charlson Comorbidity Index</b>               |          |                |           |
| 0                                               | 75,182   | 97.94%         |           |
| 1                                               | 1,555    | 2.03%          |           |
| 2                                               | 29       | 0.03%          |           |
| <b>Length of Stay</b>                           |          |                |           |
| Less than 3 days                                | 59,724   | 77.80%         |           |
| 3-6 days                                        | 16,826   | 21.92%         |           |
| Greater than 6 days                             | 216      | 0.28%          |           |
| <b>HOSPITAL-LEVEL CHARACTERISTICS (n=198)</b>   |          |                |           |
| <b>Ownership</b>                                |          |                |           |
| Government                                      | 32       | 16.16%         |           |
| NFP                                             | 127      | 64.14%         |           |
| FP                                              | 39       | 19.70%         |           |
| <b>Location</b>                                 |          |                |           |
| Urban                                           | 174      | 87.88%         |           |
| Rural                                           | 24       | 12.12%         |           |
| <b>Teaching Status</b>                          |          |                |           |
| Yes                                             | 20       | 10.10%         |           |
| No                                              | 178      | 89.90%         |           |
| <b>Casemix (severity)</b>                       |          |                |           |
|                                                 | <b>N</b> | <b>Mean</b>    | <b>SD</b> |
| Low                                             | 66       | 1.283          | 0.121     |
| Medium                                          | 66       | 1.555          | 0.053     |
| High                                            | 66       | 1.787          | 0.138     |
| <b>Capacity</b>                                 |          |                |           |
| Licensed Beds                                   | 198      | 280.45         | 180.366   |
| <b>Payer Mix</b>                                |          |                |           |
| % Medicare                                      | 198      | 37.79%         | 12.38%    |

1  
2  
3  
4  
5  
6  
7  
8  
9  
10  
11  
12  
13  
14  
15  
16  
17  
18  
19  
20  
21  
22  
23  
24  
25  
26  
27  
28  
29  
30  
31  
32  
33  
34  
35  
36  
37  
38  
39  
40  
41  
42  
43  
44  
45  
46  
47  
48  
49  
50  
51  
52  
53  
54  
55  
56  
57  
58  
59  
60

|                                     |          |             |           |
|-------------------------------------|----------|-------------|-----------|
| % Medicaid                          | 198      | 28.13%      | 15.68%    |
| <b>MARKET-LEVEL CHARACTERISTICS</b> |          |             |           |
|                                     | <b>N</b> | <b>Mean</b> | <b>SD</b> |
| <b>Wage Index</b>                   |          |             |           |
| Low                                 | 121      | 1.196       | 0.007     |
| Medium                              | 12       | 1.223       | 0.01      |
| High                                | 65       | 1.486       | 0.142     |
| <b>Herfindahl-Hirschman Index</b>   |          |             |           |
| Low                                 | 67       | 1178        | 629       |
| Medium                              | 70       | 3351        | 721       |
| High                                | 61       | 6831        | 1986      |
| <b>% Without Insurance</b>          | 198      | 18.31%      | 3.77%     |
| <b>% Below Poverty Line</b>         | 198      | 13.80%      | 4.41%     |

For peer review only

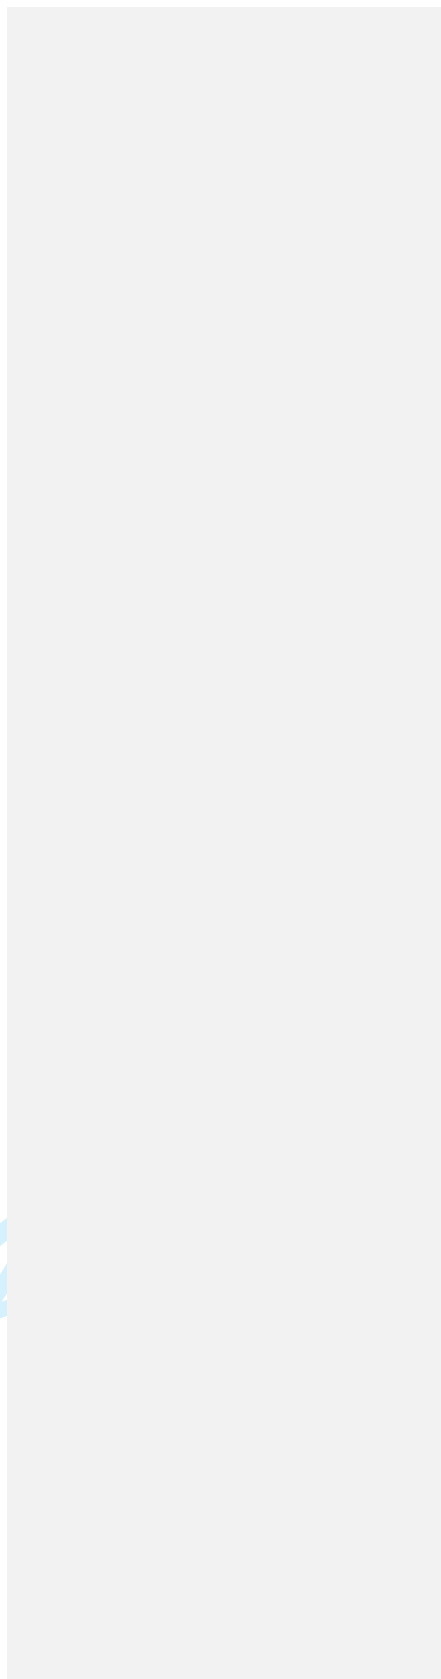

Table 2. Characteristics of study sample for uncomplicated [vaginal deliveries](#)/[cesarean sections](#) (DRG [76675](#))

| PATIENT-LEVEL CHARACTERISTICS (n=32,660) |        |         |         |
|------------------------------------------|--------|---------|---------|
| Age categories                           | N      | Percent |         |
| 18-34                                    | 22,694 | 69.49%  |         |
| 35-64                                    | 9,966  | 30.51%  |         |
| <b>Sex</b>                               |        |         |         |
| Male                                     | 0      | 0.00%   |         |
| Female                                   | 32,660 | 100.00% |         |
| <b>Private Insurance Type</b>            |        |         |         |
| Managed Care-Knox Keene                  | 14,696 | 45.00%  |         |
| Managed Care-Other                       | 15,237 | 46.65%  |         |
| Traditional Coverage                     | 2,727  | 8.35%   |         |
| <b>Charlson Comorbidity Index</b>        |        |         |         |
| 0                                        | 31,756 | 97.23%  |         |
| 1                                        | 894    | 2.74%   |         |
| 2                                        | 10     | 0.03%   |         |
| <b>Length of Stay</b>                    |        |         |         |
| Less than 3 days                         | 7,172  | 21.96%  |         |
| 3-6 days                                 | 25,325 | 77.54%  |         |
| Greater than 6 days                      | 163    | 0.50%   |         |
| HOSPITAL-LEVEL CHARACTERISTICS (n=195)   |        |         |         |
| <b>Ownership</b>                         |        |         |         |
| Government                               | 30     | 15.38%  |         |
| NFP                                      | 127    | 64.14%  |         |
| FP                                       | 38     | 19.49%  |         |
| <b>Location</b>                          |        |         |         |
| Urban                                    | 171    | 87.69%  |         |
| Rural                                    | 24     | 12.31%  |         |
| <b>Teaching Status</b>                   |        |         |         |
| Yes                                      | 18     | 9.23%   |         |
| No                                       | 177    | 90.77%  |         |
| <b>Casemix (severity)</b>                |        |         |         |
|                                          | N      | Mean    | SD      |
| Low                                      | 65     | 1.287   | 0.125   |
| Medium                                   | 65     | 1.559   | 0.052   |
| High                                     | 65     | 1.789   | 0.138   |
| <b>Capacity</b>                          |        |         |         |
| Licensed Beds                            | 195    | 279.672 | 180.807 |
| <b>Payer Mix</b>                         |        |         |         |
| % Medicare                               | 195    | 37.94%  | 12.06%  |

1  
2  
3  
4  
5  
6  
7  
8  
9  
10  
11  
12  
13  
14  
15  
16  
17  
18  
19  
20  
21  
22  
23  
24  
25  
26  
27  
28  
29  
30  
31  
32  
33  
34  
35  
36  
37  
38  
39  
40  
41  
42  
43  
44  
45  
46  
47  
48  
49  
50  
51  
52  
53  
54  
55  
56  
57  
58  
59  
60

|                                     |          |             |           |
|-------------------------------------|----------|-------------|-----------|
| % Medicaid                          | 195      | 27.96%      | 15.64%    |
| <b>MARKET-LEVEL CHARACTERISTICS</b> |          |             |           |
| <b>Wage Index</b>                   | <b>N</b> | <b>Mean</b> | <b>SD</b> |
| Low                                 | 119      | 1.196       | 0.007     |
| Medium                              | 12       | 1.223       | 0.01      |
| High                                | 64       | 1.484       | 0.142     |
| <b>Herfindahl-Hirschman Index</b>   |          |             |           |
| Low                                 | 72       | 1283        | 713       |
| Medium                              | 59       | 3440        | 591       |
| High                                | 64       | 6809        | 2115      |
| <b>% Without Insurance</b>          | 195      | 18.30%      | 3.66%     |
| <b>% Below Poverty Line</b>         | 195      | 13.77%      | 4.43%     |

For peer review only



Table 3. Regression of adjusted charges on hospital and market characteristics for uncomplicated vaginal deliveries

|                                                      | Multiplicative increase<br>for each unit change in<br>predictor | 95% CI<br>lower<br>bound | 95% CI<br>upper<br>bound | p-value |
|------------------------------------------------------|-----------------------------------------------------------------|--------------------------|--------------------------|---------|
| <b>HOSPITAL-LEVEL CHARACTERISTICS</b>                |                                                                 |                          |                          |         |
| <b>Ownership</b>                                     |                                                                 |                          |                          |         |
| Government                                           | -0.096                                                          | -0.249                   | 0.057                    | 0.217   |
| NFP                                                  | Reference                                                       |                          |                          |         |
| FP                                                   | 0.198                                                           | 0.0475                   | 0.348                    | 0.010   |
| <b>Teaching Status</b>                               |                                                                 |                          |                          |         |
| Yes                                                  | -0.049                                                          | -0.317                   | 0.22                     | 0.719   |
| No                                                   | Reference                                                       |                          |                          |         |
| <b>MSA</b>                                           |                                                                 |                          |                          |         |
| Urban                                                | Reference                                                       |                          |                          |         |
| Rural                                                | 0.022                                                           | -0.144                   | 0.19                     | 0.849   |
| <b>Casemix (severity)</b>                            |                                                                 |                          |                          |         |
| Low                                                  | Reference                                                       |                          |                          |         |
| Medium                                               | 0.104                                                           | -0.044                   | 0.252                    | 0.166   |
| High                                                 | 0.196                                                           | 0.044                    | 0.349                    | 0.012   |
| <b>Capacity</b>                                      |                                                                 |                          |                          |         |
| Licensed beds                                        | 0.0003                                                          | -0.0001                  | 0.0007                   | 0.234   |
| <b>Payer Mix</b>                                     |                                                                 |                          |                          |         |
| Proportion Medicare                                  | 0.263                                                           | -0.352                   | 0.878                    | 0.400   |
| Proportion Medicaid                                  | -0.002                                                          | -0.442                   | 0.437                    | 0.992   |
| <b>Quality Indicators</b>                            |                                                                 |                          |                          |         |
| Cesarean delivery rate                               | -0.097                                                          | -2.407                   | 2.212                    | 0.934   |
| Vaginal birth after cesarean rate<br>(uncomplicated) | 0.415                                                           | -0.528                   | 1.357                    | 0.386   |
| Primary cesarean delivery rate                       | 0.208                                                           | -2.32                    | 2.737                    | 0.871   |
| <b>MARKET-LEVEL CHARACTERISTICS</b>                  |                                                                 |                          |                          |         |
| <b>Wage Index</b>                                    |                                                                 |                          |                          |         |
| Low                                                  | Reference                                                       |                          |                          |         |
| Medium                                               | 0.202                                                           | 0.0276                   | 0.376                    | 0.023   |
| High                                                 | 0.409                                                           | 0.271                    | 0.547                    | <0.001  |
| <b>Herfindahl-Hirschman Index (System-wide)</b>      |                                                                 |                          |                          |         |
| Low                                                  | Reference                                                       |                          |                          |         |
| Medium                                               | 0.012                                                           | -0.116                   | 0.139                    | 0.857   |
| High                                                 | 0.005                                                           | -0.14                    | 0.149                    | 0.951   |
| <b>% Without Insurance</b>                           | -0.012                                                          | -0.033                   | 0.009                    | 0.259   |
| <b>% Below Poverty Line</b>                          | 0.013                                                           | -0.005                   | 0.032                    | 0.153   |

Table 4. Regression of adjusted charges on hospital and market characteristics for uncomplicated cesarean sections

|                                                      | Multiplicative increase<br>for each unit change in<br>predictor | 95% CI<br>lower<br>bound | 95% CI<br>upper<br>bound | p-value |
|------------------------------------------------------|-----------------------------------------------------------------|--------------------------|--------------------------|---------|
| <b>HOSPITAL-LEVEL CHARACTERISTICS</b>                |                                                                 |                          |                          |         |
| <b>Ownership</b>                                     |                                                                 |                          |                          |         |
| Government                                           | -0.146                                                          | -0.298                   | 0.006                    | 0.060   |
| NFP                                                  | Reference                                                       |                          |                          |         |
| FP                                                   | 0.172                                                           | 0.032                    | 0.312                    | 0.016   |
| <b>Teaching Status</b>                               |                                                                 |                          |                          |         |
| Yes                                                  | 0.062                                                           | -0.187                   | 0.311                    | 0.626   |
| No                                                   | Reference                                                       |                          |                          |         |
| <b>MSA</b>                                           |                                                                 |                          |                          |         |
| Urban                                                | Reference                                                       |                          |                          |         |
| Rural                                                | 0.088                                                           | -0.081                   | 0.257                    | 0.304   |
| <b>Casemix (severity)</b>                            |                                                                 |                          |                          |         |
| Low                                                  | Reference                                                       |                          |                          |         |
| Medium                                               | 0.087                                                           | -0.052                   | 0.225                    | 0.218   |
| High                                                 | 0.123                                                           | -0.019                   | 0.265                    | 0.088   |
| <b>Capacity</b>                                      |                                                                 |                          |                          |         |
| Licensed beds                                        | -0.0002                                                         | -0.0006                  | 0.0002                   | 0.363   |
| <b>Payer Mix</b>                                     |                                                                 |                          |                          |         |
| Proportion Medicare                                  | 0.491                                                           | -0.004                   | 0.986                    | 0.052   |
| Proportion Medicaid                                  | 0.112                                                           | -0.354                   | 0.578                    | 0.636   |
| <b>Quality Indicators</b>                            |                                                                 |                          |                          |         |
| Cesarean delivery rate                               | 0.491                                                           | -1.659                   | 2.642                    | 0.653   |
| Vaginal birth after cesarean rate<br>(uncomplicated) | 0.508                                                           | -0.315                   | 1.332                    | 0.225   |
| Primary cesarean delivery rate                       | -1.192                                                          | -2.65                    | 2.262                    | 0.877   |
| <b>MARKET-LEVEL CHARACTERISTICS</b>                  |                                                                 |                          |                          |         |
| <b>Wage Index</b>                                    |                                                                 |                          |                          |         |
| Low                                                  | Reference                                                       |                          |                          |         |
| Medium                                               | 0.258                                                           | 0.067                    | 0.449                    | 0.008   |
| High                                                 | 0.378                                                           | 0.26                     | 0.497                    | ≤0.001  |
| <b>Herfindahl-Hirschman Index (System-wide)</b>      |                                                                 |                          |                          |         |
| Low                                                  | Reference                                                       |                          |                          |         |
| Medium                                               | -0.079                                                          | -0.196                   | 0.037                    | 0.183   |
| High                                                 | 0.012                                                           | -0.116                   | 0.14                     | 0.855   |
| <b>% Without Insurance</b>                           | -0.0003                                                         | -0.02                    | 0.019                    | 0.025   |
| <b>% Below Poverty Line</b>                          | -0.002                                                          | -0.019                   | 0.015                    | 0.813   |

1  
2  
3  
4  
5  
6  
7  
8  
9  
10  
11  
12  
13  
14  
15  
16  
17  
18  
19  
20  
21  
22  
23  
24  
25  
26  
27  
28  
29  
30  
31  
32  
33  
34  
35  
36  
37  
38  
39  
40  
41  
42  
43  
44  
45  
46  
47  
48  
49  
50  
51  
52  
53  
54  
55  
56  
57  
58  
59  
60

**Figure Titles & Legends:**

Figure 1. Sample [selection](#)

(no legend)

Figure 2. Adjusted charges and discount prices for uncomplicated vaginal deliveries [and uncomplicated cesarean sections](#) across California hospitals, 2011

(no legend)

For peer review only

1  
2  
3  
4  
5  
6  
7  
8  
9  
10  
11  
12  
13  
14  
15  
16  
17  
18  
19  
20  
21  
22  
23  
24  
25  
26  
27  
28  
29  
30  
31  
32  
33  
34  
35  
36  
37  
38  
39  
40  
41  
42  
43  
44  
45  
46  
47  
48  
49  
50  
51  
52  
53  
54  
55  
56  
57  
58  
59  
60

**Uncomplicated Vaginal Birth (MS-DRG 755)**

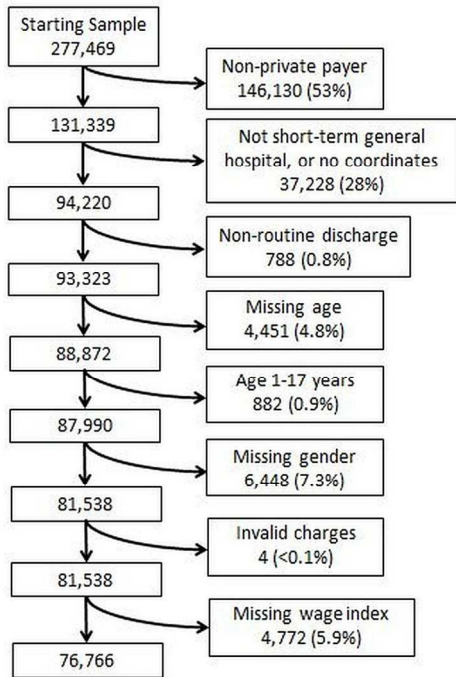

**Uncomplicated Cesarean Section (MS-DRG 766)**

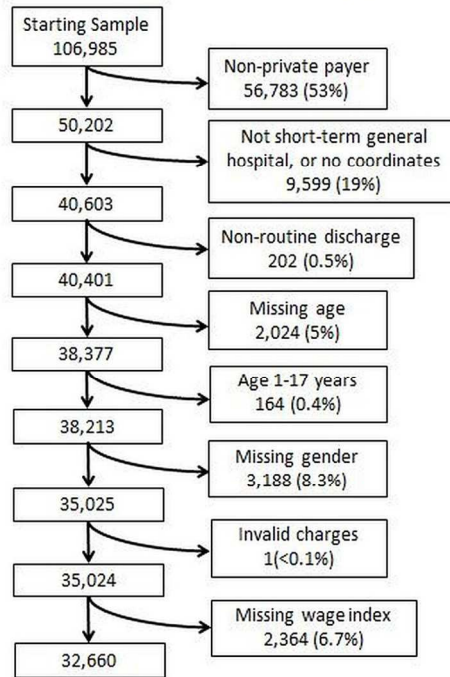

None  
121x90mm (300 x 300 DPI)

Review only



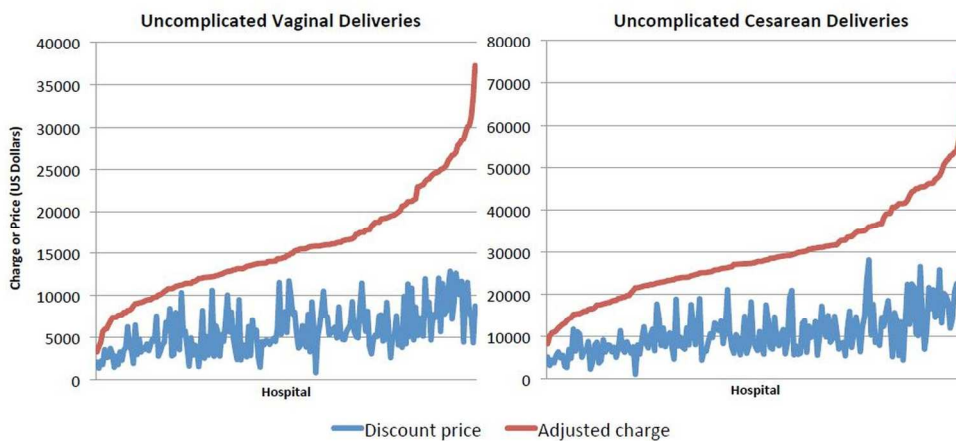

166x90mm (300 x 300 DPI)

review only

1  
2  
3  
4  
5  
6  
7  
8  
9  
10  
11  
12  
13  
14  
15  
16  
17  
18  
19  
20  
21  
22  
23  
24  
25  
26  
27  
28  
29  
30  
31  
32  
33  
34  
35  
36  
37  
38  
39  
40  
41  
42  
43  
44  
45  
46  
47  
48  
49  
50  
51  
52  
53  
54  
55  
56  
57  
58  
59  
60

Supplementary Table 1. First-stage regression of log raw charges on patient characteristics for uncomplicated vaginal deliveries (DRG 775)

|                                                                   | <b>Multiplicative increase<br/>for each unit change in<br/>predictor</b> | <b>95% CI<br/>lower<br/>bound</b> | <b>95% CI<br/>upper<br/>bound</b> | <b>p-value</b> |
|-------------------------------------------------------------------|--------------------------------------------------------------------------|-----------------------------------|-----------------------------------|----------------|
| <b>PATIENT-LEVEL CHARACTERISTICS</b>                              |                                                                          |                                   |                                   |                |
| <b>Charlson Comorbidities</b>                                     | 0.013                                                                    | 0.003                             | 0.024                             | 0.012          |
| <b>Log Length of Stay (days)</b>                                  | 0.869                                                                    | 0.830                             | 0.908                             | <0.001         |
| <b>No. Conditions Present on Admission</b>                        | 0.023                                                                    | 0.021                             | 0.026                             | <0.001         |
| <b>Age</b>                                                        |                                                                          |                                   |                                   |                |
| 18-34 years                                                       | 0.033                                                                    | 0.027                             | 0.039                             | <0.001         |
| 35-64 years                                                       | Reference                                                                |                                   |                                   |                |
| <b>Insurance Type</b>                                             |                                                                          |                                   |                                   |                |
| Managed Care – Knox-Keene/Medi-Cal County Organized Health System | Reference                                                                |                                   |                                   |                |
| Managed Care – Other                                              | 0.006                                                                    | 0.000                             | 0.010                             | 0.022          |
| Traditional Coverage                                              | -0.000                                                                   | -0.009                            | 0.008                             | 0.927          |

Supplementary Table 2. First-stage regression of log raw charges on patient characteristics for uncomplicated cesarean sections (DRG 766)

|                                                                   | <b>Multiplicative increase<br/>for each unit change in<br/>predictor</b> | <b>95% CI<br/>lower<br/>bound</b> | <b>95% CI<br/>upper<br/>bound</b> | <b>p-value</b> |
|-------------------------------------------------------------------|--------------------------------------------------------------------------|-----------------------------------|-----------------------------------|----------------|
| <b>PATIENT-LEVEL CHARACTERISTICS</b>                              |                                                                          |                                   |                                   |                |
| <b>Charlson Comorbidities</b>                                     | 0.011                                                                    | 0.001                             | 0.022                             | 0.026          |
| <b>Log Length of Stay (days)</b>                                  | 0.740                                                                    | 0.709                             | 0.771                             | <0.001         |
| <b>No. Conditions Present on Admission</b>                        | 0.014                                                                    | 0.011                             | 0.016                             | <0.001         |
| <b>Age</b>                                                        |                                                                          |                                   |                                   |                |
| 18-34 years                                                       | 0.022                                                                    | 0.017                             | 0.028                             | <0.001         |
| 35-64 years                                                       | Reference                                                                |                                   |                                   |                |
| <b>Insurance Type</b>                                             |                                                                          |                                   |                                   |                |
| Managed Care – Knox-Keene/Medi-Cal County Organized Health System | Reference                                                                |                                   |                                   |                |
| Managed Care – Other                                              | -0.004                                                                   | -0.009                            | 0.000                             | 0.069          |
| Traditional Coverage                                              | 0.002                                                                    | -0.007                            | 0.011                             | 0.686          |

STROBE 2007 (v4) Statement—Checklist of items that should be included in reports of *cross-sectional studies*

| Section/Topic                | Item # | Recommendation                                                                                                                                                                       | Reported on page # |
|------------------------------|--------|--------------------------------------------------------------------------------------------------------------------------------------------------------------------------------------|--------------------|
| Title and abstract           | 1      | (a) Indicate the study's design with a commonly used term in the title or the abstract                                                                                               | 1                  |
|                              |        | (b) Provide in the abstract an informative and balanced summary of what was done and what was found                                                                                  | 2                  |
| <b>Introduction</b>          |        |                                                                                                                                                                                      |                    |
| Background/rationale         | 2      | Explain the scientific background and rationale for the investigation being reported                                                                                                 | 5&6                |
| Objectives                   | 3      | State specific objectives, including any prespecified hypotheses                                                                                                                     | 6                  |
| <b>Methods</b>               |        |                                                                                                                                                                                      |                    |
| Study design                 | 4      | Present key elements of study design early in the paper                                                                                                                              | 6-7                |
| Setting                      | 5      | Describe the setting, locations, and relevant dates, including periods of recruitment, exposure, follow-up, and data collection                                                      | 6-7                |
| Participants                 | 6      | (a) Give the eligibility criteria, and the sources and methods of selection of participants                                                                                          | 7                  |
| Variables                    | 7      | Clearly define all outcomes, exposures, predictors, potential confounders, and effect modifiers. Give diagnostic criteria, if applicable                                             | 8-9                |
| Data sources/<br>measurement | 8*     | For each variable of interest, give sources of data and details of methods of assessment (measurement). Describe comparability of assessment methods if there is more than one group | 9                  |
| Bias                         | 9      | Describe any efforts to address potential sources of bias                                                                                                                            | 8-9                |
| Study size                   | 10     | Explain how the study size was arrived at                                                                                                                                            | 6-7                |
| Quantitative variables       | 11     | Explain how quantitative variables were handled in the analyses. If applicable, describe which groupings were chosen and why                                                         | 8-9                |
| Statistical methods          | 12     | (a) Describe all statistical methods, including those used to control for confounding                                                                                                | 8-9                |
|                              |        | (b) Describe any methods used to examine subgroups and interactions                                                                                                                  | NA                 |
|                              |        | (c) Explain how missing data were addressed                                                                                                                                          | 7-8                |
|                              |        | (d) If applicable, describe analytical methods taking account of sampling strategy                                                                                                   | NA                 |
|                              |        | (e) Describe any sensitivity analyses                                                                                                                                                | NA                 |
| <b>Results</b>               |        |                                                                                                                                                                                      |                    |

|                          |     |                                                                                                                                                                                                              |                                        |
|--------------------------|-----|--------------------------------------------------------------------------------------------------------------------------------------------------------------------------------------------------------------|----------------------------------------|
| Participants             | 13* | (a) Report numbers of individuals at each stage of study—eg numbers potentially eligible, examined for eligibility, confirmed eligible, included in the study, completing follow-up, and analysed            | 10, Figure 1                           |
|                          |     | (b) Give reasons for non-participation at each stage                                                                                                                                                         | NA                                     |
|                          |     | (c) Consider use of a flow diagram                                                                                                                                                                           | Figure 1                               |
| Descriptive data         | 14* | (a) Give characteristics of study participants (eg demographic, clinical, social) and information on exposures and potential confounders                                                                     | 10                                     |
|                          |     | (b) Indicate number of participants with missing data for each variable of interest                                                                                                                          | Figure 1 (excluded – no other missing) |
| Outcome data             | 15* | Report numbers of outcome events or summary measures                                                                                                                                                         | 10-11                                  |
| Main results             | 16  | (a) Give unadjusted estimates and, if applicable, confounder-adjusted estimates and their precision (eg, 95% confidence interval). Make clear which confounders were adjusted for and why they were included | 11-12                                  |
|                          |     | (b) Report category boundaries when continuous variables were categorized                                                                                                                                    | 23-28                                  |
|                          |     | (c) If relevant, consider translating estimates of relative risk into absolute risk for a meaningful time period                                                                                             | NA                                     |
| Other analyses           | 17  | Report other analyses done—eg analyses of subgroups and interactions, and sensitivity analyses                                                                                                               | NA                                     |
| <b>Discussion</b>        |     |                                                                                                                                                                                                              |                                        |
| Key results              | 18  | Summarise key results with reference to study objectives                                                                                                                                                     | 12-13                                  |
| Limitations              | 19  | Discuss limitations of the study, taking into account sources of potential bias or imprecision. Discuss both direction and magnitude of any potential bias                                                   | 15-16                                  |
| Interpretation           | 20  | Give a cautious overall interpretation of results considering objectives, limitations, multiplicity of analyses, results from similar studies, and other relevant evidence                                   | 13-14                                  |
| Generalisability         | 21  | Discuss the generalisability (external validity) of the study results                                                                                                                                        | 16                                     |
| <b>Other information</b> |     |                                                                                                                                                                                                              |                                        |
| Funding                  | 22  | Give the source of funding and the role of the funders for the present study and, if applicable, for the original study on which the present article is based                                                | 4                                      |

\*Give information separately for cases and controls in case-control studies and, if applicable, for exposed and unexposed groups in cohort and cross-sectional studies.

**Note:** An Explanation and Elaboration article discusses each checklist item and gives methodological background and published examples of transparent reporting. The STROBE checklist is best used in conjunction with this article (freely available on the Web sites of PLoS Medicine at <http://www.plosmedicine.org/>, Annals of Internal Medicine at <http://www.annals.org/>, and Epidemiology at <http://www.epidem.com/>). Information on the STROBE Initiative is available at [www.strobe-statement.org](http://www.strobe-statement.org).
